# Supplementary material for: Transcriptome Analysis Reveals the Profile of Long Non-coding RNAs During Chicken Muscle Development
Source: Front Physiol. 2021 May 10;12:660370. doi: 10.3389/fphys.2021.660370 (PMC8141850; doi:10.3389/fphys.2021.660370)
Supplement: Supplementary Table 1 — Primers used in this study (XLSX). [file Table_1.XLSX]

## Sheet: Sheet1
Table S1. Primers used in this study
gene name	Sequence(5'-3')	Product length/bp
Primers for qPCR
MSTRG.34078.1	F: ATACAGGGTCAGGTGCAAGC	198
	R: TTGGGCTGTATGAACCAACA
MSTRG.13530.1	F: CAGGGCTGAGTCTTGCTTTT	150
	R: TCAGAGCAGTTGGACGTAGG
MSTRG.11775.1	F: GGAACAGCTGTCATTCAGCA	158
	R: CTGCAGAAACGGTCAGTGAA
MSTRG.1790.1	F: GCCTGATGAATGGGATGAGT	162
	R: CTTGGCACCTCCACCACTAT
MSTRG.12254.1	F: ATACCGGCAGCCATTTAGTG	192
	R: TGTCAGCTCCACCAGAGTTG
MSTRG.1967.1	F: CCTAAATTTCCAGTCAGAACCTG	151
	R: CAAATCGTTTGCCAGAACAG
Primers for sex determin of chicken
CHD1	F: GTTACTGATTCGTCTACGAGA	600/450
	R: ATTGAAATGATCCAGTGCTTG
