# Supplementary material for: Transcriptome Analysis Reveals the Profile of Long Non-coding RNAs During Chicken Muscle Development
Source: Front Physiol. 2021 May 10;12:660370. doi: 10.3389/fphys.2021.660370 (PMC8141850; doi:10.3389/fphys.2021.660370)
Supplement: Supplementary Table 6 — The transcripts in profile 21. (XLSX). [file Table_6.XLSX]

## Sheet: pofile21_lncRNAs
Table S6 The transcripts in profile 21 (lncRNAs)
t_id	class_code	chr	strand	start	end	t_name	num_exons	length	gene_id	gene_name	FPKM.D98_1	FPKM.D98_2	FPKM.D98_3	FPKM.D56_1	FPKM.D56_2	FPKM.D56_3	FPKM.D14_1	FPKM.D14_2	FPKM.D14_3	FPKM.D1_1	FPKM.D1_2	FPKM.D1_3	FPKM.E17_1	FPKM.E17_3	FPKM.E12_1	FPKM.E12_2	FPKM.E12_3
6404	x	chr1	-	95100898	95109358	MSTRG.2892.2	4	839	MSTRG.2892	GBE1	3.12453	3.73628	2.05978	3.3239	2.9995	2.85945	0.976177	0.627401	2.7082	1.14489	0	3.8331	0	2.02379	0.050477	0.341527	1.09123
6705	i	chr1	.	104986483	104986710	MSTRG.3019.1	1	228	MSTRG.3019	ENSGALG00000032882	0.515467	0.884415	0.485703	1.34416	0.631488	1.74049	0.929429	0.492119	0.64274	1.58673	1.77386	0.292413	0.032044	0	0	0.025713	0
8873	u	chr1	+	142731193	142733838	MSTRG.3913.1	2	1293	MSTRG.3913	.	5.45824	3.71135	3.03738	7.20311	8.57536	2.53429	6.5402	3.80423	2.19414	0.43315	0.324139	0.143208	0.047268	0	0.034743	0.018017	0
10963	u	chr1	+	189151254	189166252	MSTRG.4872.1	1	14999	MSTRG.4872	.	4.4485	3.19949	3.72303	3.48908	3.70215	5.07923	4.867	3.91146	2.90737	4.09669	0.477353	3.87902	0.944405	1.2299	0.104241	1.71313	1.22097
25753	x	chr18	+	10431249	10433384	MSTRG.10414.2	3	1456	MSTRG.10414	ACSF2	6.36185	6.99682	6.6227	7.47857	3.17407	9.63922	5.42242	5.32876	4.60297	0.183695	2.47594	2.21975	1.50065	0.452996	2.1171	1.78728	1.3872
35084	j	chr2	+	139865984	139948542	MSTRG.14215.1	4	3603	MSTRG.14215	ENSGALG00000033453	1.34292	1.50821	1.17167	0.614644	1.02416	0.963971	1.08699	0.598351	1.1174	0	1.72388	0.795882	0.170763	0	0	0.508305	0.185997
45279	x	chr3	-	9742510	9767423	MSTRG.17611.1	3	480	MSTRG.17611	LGALSL	0.59276	1.31761	1.4031	1.62232	0.397235	1.46608	1.18461	1.31146	0.750881	0	0	0.120886	0.170942	0.106447	0.060667	0	0
59296	u	chr5	.	12541911	12551308	MSTRG.23802.1	1	9398	MSTRG.23802	.	0.359865	1.63333	0.176031	1.05184	2.03972	1.03814	1.07198	0.547267	1.26758	0.098295	0.163584	0.085719	0.182779	0.153459	0.190646	0.125958	0.148352
60802	i	chr5	-	29291378	29329422	MSTRG.24338.1	2	24272	MSTRG.24338	GPHN	3.52263	4.69822	1.19593	1.89553	3.93804	2.05983	2.78719	2.82041	2.25706	2.41919	1.5919	1.41662	0.61706	0.825176	0.669089	0.83876	0.633089
62069	i	chr5	.	48598089	48601222	MSTRG.24896.1	1	3134	MSTRG.24896	YY1	3.16516	2.77536	4.40472	1.80607	2.79689	4.26221	2.41028	2.50748	2.59824	2.62147	1.87348	2.63388	0.425895	0.452594	1.0039	0.986793	1.03763
75593	u	chrAADN04001305.1	-	23	7499	MSTRG.30424.1	2	301	MSTRG.30424	.	2.37483	4.16785	3.42562	0.080654	0.12141	0	0	0.975221	0	0	0	0.06737	0.024272	0.171507	0	0.070219	0
75829	u	chrAADN04001652.1	.	8832	9417	MSTRG.30597.1	1	586	MSTRG.30597	.	37.1735	73.8121	88.3363	34.7057	37.681	48.6861	13.8739	21.2642	49.1806	4.46471	63.0497	3.86475	4.94046	1.92373	1.21978	3.67999	3.57576
75840	u	chrAADN04001678.1	.	518	729	MSTRG.30605.1	1	212	MSTRG.30605	.	6.21118	14.6062	18.5029	6.98137	8.06234	6.36835	0.09238	4.44492	9.42567	1.6475	4.39098	1.05658	0.570618	0.084498	0.193656	0.216859	0.85003
76063	u	chrAADN04001811.1	+	3361	20002	MSTRG.30672.1	2	482	MSTRG.30672	.	2.54921	4.93717	3.88078	1.19786	3.429	2.59597	0.674802	1.5661	3.06979	0	1.24592	0.070825	0.201131	0.03953	0.146898	0	0.143582
77404	u	chrAADN04004039.1	.	2476	4795	MSTRG.31664.1	1	2320	MSTRG.31664	.	2.44471	1.37025	1.17255	3.04349	4.70785	0.665208	2.95607	1.71621	0.929024	0.227137	0.284154	0	0	0.010599	0	0.010041	0.009943
77447	u	chrAADN04004137.1	.	9309	10440	MSTRG.31694.1	1	1132	MSTRG.31694	.	97.186	204.872	177.891	94.2782	104.638	99.0392	26.1409	63.4297	104.178	26.1427	25.692	41.4707	28.8609	47.1139	17.705	28.8167	37.3213
77553	u	chrAADN04004386.1	.	13992	14489	MSTRG.31772.1	1	498	MSTRG.31772	.	1.38547	3.10905	3.01317	1.5437	1.51791	0.869792	0.191443	0.90993	1.58976	0.795071	1.88439	0.968184	0.831436	1.16186	0.039428	0.166667	0.535423
78152	u	chrAADN04005436.1	.	12405	13010	MSTRG.32189.1	1	606	MSTRG.32189	.	7.30426	20.1307	22.2309	11.1825	8.74926	16.6351	7.14913	2.11818	10.4094	0.790321	10.2804	1.42118	2.49168	2.26759	1.00288	1.45798	3.26768
78328	u	chrAADN04005797.1	.	12746	12958	MSTRG.32329.1	1	213	MSTRG.32329	.	1.70158	4.66516	3.63439	2.2006	1.03286	1.40708	0.288789	0.563178	1.76236	0.305834	0.51785	0.481495	0.450525	0.785965	0.105452	0.199907	0.324912
78359	u	chrAADN04005841.1	.	7908	8123	MSTRG.32355.1	1	216	MSTRG.32355	.	2.45951	2.8196	2.8956	1.16811	0.673745	0.665775	0	0.44564	1.85862	0.39489	0.432924	0	0.336941	0	0	0.212129	0.567383
79652	u	chrAADN04008222.1	.	897	1536	MSTRG.33418.1	1	640	MSTRG.33418	.	0.887731	1.727	1.37371	1.03733	0.767453	0.443811	0.061078	0.743881	0.891153	0.563342	1.21476	0.637913	0.152685	0.598519	0.173818	0.097627	0.131767
79761	u	chrAADN04008368.1	.	3072	5428	MSTRG.33495.1	1	2357	MSTRG.33495	.	0.26391	2.17222	0.087287	1.55763	1.53055	0.883745	0.412197	0.244673	0.663349	0.037262	0.015599	0.120572	0.304249	0.171764	0.16112	0.123152	0.04777
80338	u	chrAADN04009392.1	+	949	8603	MSTRG.33991.1	2	389	MSTRG.33991	.	4.62665	5.73986	6.76358	3.28149	2.10447	4.53883	1.893	2.02992	3.06151	1.21971	2.293	1.93328	1.18504	0.426593	0.866115	0.980384	0.689248
80494	u	chrAADN04009621.1	.	8371	9000	MSTRG.34091.1	1	630	MSTRG.34091	.	4.53406	2.66752	3.87618	1.16657	2.27874	3.67253	1.84092	0.947876	2.63609	4.15335	1.05789	1.37018	1.16705	1.99066	1.04361	1.43648	0.764352
80582	u	chrAADN04009819.1	-	7039	8858	MSTRG.34175.1	3	246	MSTRG.34175	.	5.24253	5.73456	6.91955	6.90211	4.30086	3.82155	3.42199	3.83568	7.95224	0.793832	1.72876	2.56073	1.83793	1.36371	0	0.361858	0.535328
80641	u	chrAADN04009913.1	.	78	5996	MSTRG.34218.1	1	5919	MSTRG.34218	.	2.42566	2.19431	3.66929	0.970231	0.635403	1.52422	0.988	1.77391	0.959979	1.8194	0.895051	1.70804	0.973309	0.777798	0.476822	0.714115	0.719937
81081	u	chrAADN04010794.1	.	48	3054	MSTRG.34606.1	1	3007	MSTRG.34606	.	10.3492	11.3517	6.76456	5.93224	11.2189	13.0789	10.9068	10.2634	13.3438	5.3526	6.02726	5.97454	0.78072	0.975371	0.435169	0.512337	0.462232
81082	u	chrAADN04010794.1	.	5011	8296	MSTRG.34607.1	1	3286	MSTRG.34607	.	7.19063	8.23224	4.12833	4.57636	8.62419	7.9054	8.66446	7.74365	7.50791	3.73715	4.17189	3.5049	0.743464	0.678164	0.207168	0.388929	0.304106
81480	u	chrAADN04011440.1	.	3631	3958	MSTRG.34911.1	1	328	MSTRG.34911	.	0.754536	1.80323	1.35485	0.528676	1.13619	0.304747	0.562294	0.5166	0.322912	0.134832	0	0	0	0.211519	0.07238	0	0.122033
81793	u	chrAADN04011989.1	.	5085	7149	MSTRG.35189.1	1	2065	MSTRG.35189	.	2.58036	1.65488	2.0942	0.134193	0.254276	0.482541	0.636132	0.620332	0.634274	0.249728	0.069677	0.308305	0.070284	0.035725	0	0.021292	0
82017	u	chrAADN04012360.1	.	1549	4581	MSTRG.35386.1	1	3033	MSTRG.35386	.	1.00026	1.53357	1.65566	1.22463	1.56675	1.86478	1.05499	0.916412	1.34584	1.18321	1.15446	1.55617	0.328807	0.45733	0.087053	0.188457	0.196344
82840	u	chrAADN04013723.1	.	5956	6350	MSTRG.36033.1	1	395	MSTRG.36033	.	2.26223	4.02779	3.90464	2.02056	2.21778	1.80051	0.230033	1.43862	2.2308	0.349715	0.957967	0.742545	1.10995	0.753236	0	0.822934	0.448264
82937	u	chrAADN04013890.1	.	1904	2978	MSTRG.36104.1	1	1075	MSTRG.36104	.	1.1396	2.41919	2.04569	0.904816	0.85148	0.991956	0.150845	0.289789	0.972172	0.23502	0	0.535913	0.506913	0.427275	0.133529	0.346152	0.495483
83510	u	chrAADN04014962.1	.	609	2137	MSTRG.36552.1	1	1529	MSTRG.36552	.	19.739	10.9536	6.26925	4.14817	10.9542	6.92268	9.21696	7.69115	11.8702	3.76558	5.51831	6.39764	1.40611	1.01907	0.601518	0.392399	0.597105
83734	u	chrAADN04015518.1	.	467	5495	MSTRG.36759.1	1	5029	MSTRG.36759	.	5.33446	3.81013	2.90224	5.03634	8.02876	5.36995	5.04281	5.25636	4.38954	2.08343	1.77818	2.36556	1.06309	0.787489	0.956523	0.778403	1.19059
84645	u	chrAADN04017766.1	.	102	546	MSTRG.37510.1	1	445	MSTRG.37510	.	0.800406	8.62711	0.709045	8.18013	10.3759	3.7749	1.64566	1.58204	3.63075	0.690769	0.617195	0.57699	0.877102	0.275931	0.050475	0	0
84646	u	chrAADN04017766.1	.	1048	2191	MSTRG.37511.1	1	1144	MSTRG.37511	.	1.94463	4.68585	0.833615	7.76178	8.91253	2.95731	2.0517	2.97478	1.33392	0.610992	0.688209	1.06941	0.348672	0.294669	0.115073	0.020363	0
85465	u	chrAADN04020188.1	.	327	911	MSTRG.38142.1	1	585	MSTRG.38142	.	1.68897	5.65689	3.65998	2.339	1.6881	1.53576	0.742193	0.508641	2.31885	0.148142	0.984128	0.279055	0.392921	0.956226	0.170581	0.467046	0.188029
86108	u	chrAADN04024010.1	.	965	1332	MSTRG.38715.1	1	368	MSTRG.38715	.	0.605249	1.38767	1.50204	1.4299	2.21432	1.26203	1.1019	0.645123	1.74769	0.619959	1.28253	1.22537	0.279092	0.200466	0.063057	0.423	0.125374

## Sheet: profile21_mRNAs
Table S6 The transcripts in profile 21 (mRNAs)
t_id	class_code	chr	strand	start	end	t_name	num_exons	length	gene_id	gene_name	GO	KEGG	KO_ENTRY	EC	Description	FPKM.D98_1	FPKM.D98_2	FPKM.D98_3	FPKM.D56_1	FPKM.D56_2	FPKM.D56_3	FPKM.D14_1	FPKM.D14_2	FPKM.D14_3	FPKM.D1_1	FPKM.D1_2	FPKM.D1_3	FPKM.E17_1	FPKM.E17_3	FPKM.E12_1	FPKM.E12_2	FPKM.E12_3
360	0	chr1	+	3561963	3579733	ENSGALT00000049952	16	1584	MSTRG.152	PFKFB3	GO:0005654(nucleoplasm)	00051(Fructose and mannose metabolism)	NA	NA	6-phosphofructo-2-kinase/fructose-2,6-biphosphatase 3 [Source:HGNC Symbol;Acc:HGNC:8874]	572.696	212.17	243.495	4.13462	110.642	14.0559	102.365	53.6	82.192	0.148293	0.448389	1.15545	0.977374	0.835055	0	0	0.169655
363	0	chr1	+	3561963	3579756	ENSGALT00000083042	15	1584	MSTRG.152	PFKFB3	GO:0005654(nucleoplasm)	00051(Fructose and mannose metabolism)	NA	NA	6-phosphofructo-2-kinase/fructose-2,6-biphosphatase 3 [Source:HGNC Symbol;Acc:HGNC:8874]	566.785	240.564	241.064	4.03717	110.323	23.5708	99.9019	54.3065	80.0252	0.153895	1.23319	3.69992	0.928105	2.24896	0.497979	0.678025	0.792186
371	0	chr1	-	3665779	3701334	ENSGALT00000071190	18	2648	MSTRG.153	PRKCQ	NA	04140(Autophagy - animal);04920(Adipocytokine signaling pathway);04270(Vascular smooth muscle contraction)	NA	NA	protein kinase C theta [Source:HGNC Symbol;Acc:HGNC:9410]	70.4293	29.1554	35.3307	18.9679	14.8243	6.50105	13.5628	16.2789	9.70791	1.17728	1.85936	5.42313	4.3689	2.12465	0.837651	1.19455	1.1185
388	0	chr1	+	4248371	4255204	ENSGALT00000010913	10	1125	MSTRG.160	ATP5C1	GO:0070062(extracellular exosome);GO:0045261(proton-transporting ATP synthase complex, catalytic core F(1));GO:0043209(myelin sheath);GO:0016020(membrane);GO:0005753(mitochondrial proton-transporting ATP synthase complex);GO:0005743(mitochondrial inner membrane);GO:0005739(mitochondrion);GO:0006754(ATP biosynthetic process);GO:0016887(ATPase activity);GO:0003723(RNA binding);GO:0046933(proton-tra…	00190(Oxidative phosphorylation)	NA	NA	ATP synthase, H+ transporting, mitochondrial F1 complex, gamma polypeptide 1 [Source:HGNC Symbol;Acc:HGNC:833]	48.6987	40.7982	44.6841	88.8124	97.0103	34.014	95.4656	107.664	101.938	37.6125	23.2165	22.6948	26.8231	21.4111	11.9243	33.8304	8.32831
493	0	chr1	-	6734021	6745789	ENSGALT00000076689	9	2058	MSTRG.188	PHYH	GO:0048037(cofactor binding);GO:0005777(peroxisome);GO:0005739(mitochondrion);GO:0006720(isoprenoid metabolic process);GO:0003824(catalytic activity);GO:0008198(ferrous iron binding);GO:0031406(carboxylic acid binding);GO:0048244(phytanoyl-CoA dioxygenase activity);GO:0001561(fatty acid alpha-oxidation);GO:0006103(2-oxoglutarate metabolic process);GO:0097089(methyl-branched fatty acid metabolic p…	04146(Peroxisome)	NA	NA	phytanoyl-CoA 2-hydroxylase [Source:HGNC Symbol;Acc:HGNC:8940]	35.3583	41.9511	35.7183	37.3072	37.4566	31.4483	35.3765	35.3721	33.7221	24.6548	17.9398	22.161	13.4914	9.83373	5.05582	6.03283	5.57442
711	0	chr1	+	12776938	12782933	ENSGALT00000013522	2	3117	MSTRG.297	FGL2	GO:0070062(extracellular exosome);GO:0008233(peptidase activity);GO:0006508(proteolysis)	NA	NA	NA	fibrinogen like 2 [Source:HGNC Symbol;Acc:HGNC:3696]	8.32994	3.79777	7.00414	7.42995	2.91672	5.42996	2.14778	1.70459	1.43021	3.61246	2.71652	4.23961	0.074916	0.39127	0.072013	0.089487	0.059208
730	0	chr1	-	12927124	12946956	ENSGALT00000013482	5	2413	MSTRG.307	NAPEPLD	GO:0070062(extracellular exosome);GO:0005829(cytosol);GO:0070290(N-acylphosphatidylethanolamine-specific phospholipase D activity);GO:0008270(zinc ion binding);GO:0042802(identical protein binding);GO:0070291(N-acylethanolamine metabolic process)	NA	NA	NA	N-acyl phosphatidylethanolamine phospholipase D [Source:HGNC Symbol;Acc:HGNC:21683]	13.4919	15.0514	5.50545	9.42834	8.07982	8.32009	5.91871	6.29985	3.15169	1.67354	0.379474	1.04178	1.73333	1.96047	1.1813	0.009654	1.89034
814	0	chr1	-	14227437	14253838	ENSGALT00000013144	11	1637	MSTRG.339	NAMPT	GO:0004514(nicotinate-nucleotide diphosphorylase (carboxylating) activity);GO:0009435(NAD biosynthetic process);GO:0032922(circadian regulation of gene expression);GO:0045944(positive regulation of transcription from RNA polymerase II promoter);GO:0042802(identical protein binding);GO:0005737(cytoplasm);GO:0007623(circadian rhythm);GO:0070062(extracellular exosome);GO:0030054(cell junction);GO:00…	00760(Nicotinate and nicotinamide metabolism);04621(NOD-like receptor signaling pathway)	NA	NA	nicotinamide phosphoribosyltransferase [Source:HGNC Symbol;Acc:HGNC:30092]	147.824	176.521	75.9203	170.717	188.27	101.356	218.589	287.221	212.936	140.716	59.2677	60.1631	11.4085	12.2097	13.0014	12.3012	13.537
830	0	chr1	+	14555740	14570086	ENSGALT00000013062	11	1741	MSTRG.347	HBP1	GO:0016607(nuclear speck);GO:0005654(nucleoplasm);GO:0003723(RNA binding);GO:0005634(nucleus);GO:0003677(DNA binding)	NA	NA	NA	HMG box-containing protein 1 [Source:RefSeq peptide;Acc:NP_001186383]	36.7896	27.27	34.5315	7.11098	13.3099	10.0266	25.9374	22.9799	20.5703	15.6734	8.24369	13.85	4.12424	3.09044	2.30243	1.60261	2.64789
1055	0	chr1	+	20290347	20303283	ENSGALT00000066608	9	5100	MSTRG.465	SELENOO	GO:0005739(mitochondrion)	NA	NA	NA	selenoprotein O [Source:HGNC Symbol;Acc:HGNC:30395]	5.3089	4.61056	3.67315	5.10245	4.92928	4.3365	2.12376	3.67564	4.58024	4.1686	2.41267	2.48669	1.20225	1.47751	1.85034	1.50915	1.69763
1084	0	chr1	-	20490162	20663084	ENSGALT00000075689	37	5782	MSTRG.478	PLXNB2	GO:0008360(regulation of cell shape);GO:0043087(regulation of GTPase activity);GO:0009986(cell surface);GO:0007420(brain development);GO:0005887(integral component of plasma membrane);GO:0001932(regulation of protein phosphorylation);GO:0070062(extracellular exosome);GO:0001843(neural tube closure);GO:0017154(semaphorin receptor activity);GO:0007156(homophilic cell adhesion via plasma membrane ad…	NA	NA	NA	plexin B2 [Source:HGNC Symbol;Acc:HGNC:9104]	12.8223	7.18565	6.45856	11.925	5.32799	5.51923	7.67529	5.98754	3.38379	0.504688	7.91054	1.30942	0.369679	0.539435	3.99061	0.633637	0.545121
2941	0	chr1	-	50711697	50722039	ENSGALT00000019854	4	954	MSTRG.1374	SYNGR1	GO:0031594(neuromuscular junction);GO:0048172(regulation of short-term neuronal synaptic plasticity);GO:0048169(regulation of long-term neuronal synaptic plasticity);GO:0030672(synaptic vesicle membrane);GO:0016021(integral component of membrane);GO:0016020(membrane);GO:1990830(cellular response to leukemia inhibitory factor)	NA	NA	NA	synaptogyrin 1 [Source:HGNC Symbol;Acc:HGNC:11498]	0.896154	1.40368	5.07578	2.17328	1.75924	1.64333	1.00998	1.46462	3.80213	0.41497	0.106537	0.55765	1.1924	0.413764	0.159306	0.279856	0.584283
3090	0	chr1	-	51230967	51239478	ENSGALT00000062983	17	1998	MSTRG.1413	GGA1	GO:0016020(membrane);GO:0043234(protein complex);GO:0046982(protein heterodimerization activity);GO:0005654(nucleoplasm);GO:0043231(intracellular membrane-bounded organelle);GO:0045732(positive regulation of protein catabolic process);GO:1901998(toxin transport);GO:0030306(ADP-ribosylation factor binding)	04142(Lysosome)	NA	NA	golgi associated, gamma adaptin ear containing, ARF binding protein 1 [Source:HGNC Symbol;Acc:HGNC:17842]	27.1906	25.2418	27.9299	21.7313	20.7799	23.396	14.7941	14.869	18.6579	20.6093	18.209	14.4536	11.1045	11.044	15.7206	14.6321	14.1153
3112	0	chr1	+	51492000	51505358	ENSGALT00000020381	10	3239	ENSGALG00000012472	IL2RB	GO:0019221(cytokine-mediated signaling pathway);GO:0004896(cytokine receptor activity);GO:0016021(integral component of membrane);GO:0016020(membrane);GO:0004911(interleukin-2 receptor activity);GO:0043066(negative regulation of apoptotic process)	04060(Cytokine-cytokine receptor interaction);04144(Endocytosis)	K05069	NA	interleukin 2 receptor subunit beta [Source:HGNC Symbol;Acc:HGNC:6009]	1.23118	0.73005	1.51142	0.29143	0.287096	1.88077	0.243735	0.066307	0.049022	0.038114	0.187335	0.089563	0.114728	0.010609	0.02907	0.014718	0.065137
3281	0	chr1	+	53375666	53392366	ENSGALT00000020600	11	2406	MSTRG.1465	PRDM4	GO:1990226(histone methyltransferase binding);GO:0006366(transcription from RNA polymerase II promoter);GO:0003676(nucleic acid binding);GO:0006355(regulation of transcription, DNA-templated);GO:0006351(transcription, DNA-templated);GO:0005634(nucleus);GO:0003677(DNA binding);GO:0000978(RNA polymerase II core promoter proximal region sequence-specific DNA binding);GO:0001077(transcriptional activ…	NA	NA	NA	PR/SET domain 4 [Source:HGNC Symbol;Acc:HGNC:9348]	22.9954	18.3847	21.5421	11.6137	17.6612	13.8043	2.35812	7.01092	10.3543	3.18205	0	1.30665	4.56468	3.55397	2.10122	3.65806	0.759024
3311	0	chr1	-	53642388	53676704	ENSGALT00000020627	14	2000	MSTRG.1470	CRY1	GO:0097381(photoreceptor disc membrane);GO:0042622(photoreceptor outer segment membrane);GO:0005739(mitochondrion);GO:0005634(nucleus);GO:2000850(negative regulation of glucocorticoid secretion);GO:2000323(negative regulation of glucocorticoid receptor signaling pathway);GO:2000001(regulation of DNA damage checkpoint);GO:0045892(negative regulation of transcription, DNA-templated);GO:0045744(nega…	NA	NA	NA	cryptochrome circadian regulator 1 [Source:HGNC Symbol;Acc:HGNC:2384]	26.7241	28.5922	8.6652	18.2699	18.6011	21.8836	26.6252	3.70733	12.701	3.28518	3.85698	22.1385	7.60192	1.211	4.08685	3.79027	4.30753
3532	0	chr1	+	56075644	56198466	ENSGALT00000020873	15	3621	MSTRG.1542	HIPK2	GO:0090575(RNA polymerase II transcription factor complex);GO:0016605(PML body);GO:0016604(nuclear body);GO:0005737(cytoplasm);GO:0005634(nucleus);GO:0061072(iris morphogenesis);GO:0060395(SMAD protein signal transduction);GO:0060235(lens induction in camera-type eye);GO:0060059(embryonic retina morphogenesis in camera-type eye);GO:0051091(positive regulation of sequence-specific DNA binding tran…	04218(Cellular senescence)	K08826	EC:2.7.11.1	homeodomain interacting protein kinase 2 [Source:HGNC Symbol;Acc:HGNC:14402]	36.2481	36.9597	63.0008	37.0218	31.0726	69.4129	35.7225	22.8245	3.40589	9.85317	11.8765	14.5777	4.73889	4.48095	8.04254	16.7948	6.77665
3893	0	chr1	+	60997447	61037837	ENSGALT00000067627	8	1916	MSTRG.1771	ADIPOR2	GO:0042802(identical protein binding);GO:0007186(G-protein coupled receptor signaling pathway);GO:0046982(protein heterodimerization activity);GO:0016021(integral component of membrane);GO:0016020(membrane);GO:0004872(receptor activity);GO:0055100(adiponectin binding);GO:0097003(adipokinetic hormone receptor activity);GO:0033211(adiponectin-activated signaling pathway);GO:0042593(glucose homeosta…	04920(Adipocytokine signaling pathway)	K07297	NA	adiponectin receptor 2 [Source:HGNC Symbol;Acc:HGNC:24041]	63.8386	50.9559	31.2329	25.99	38.8312	31.1615	29.0852	43.093	44.7536	37.2861	17.9099	13.341	6.76569	4.96803	5.76887	6.07165	6.96806
3954	0	chr1	+	61870544	61907992	ENSGALT00000021282	7	1770	MSTRG.1807	BCL2L13	GO:0005739(mitochondrion);GO:0016021(integral component of membrane);GO:0042981(regulation of apoptotic process);GO:0016020(membrane)	04137(Mitophagy - animal)	K15485	NA	BCL2 like 13 [Source:HGNC Symbol;Acc:HGNC:17164]	18.1174	19.2464	18.0221	17.4926	18.8359	13.2303	15.1218	18.4171	17.0848	7.42444	12.7879	13.6468	7.07378	5.74663	7.60037	9.3947	7.19556
4046	0	chr1	+	62239536	62258379	ENSGALT00000021340	5	4043	MSTRG.1801	BPGM	GO:0070062(extracellular exosome);GO:0043456(regulation of pentose-phosphate shunt);GO:0046538(2,3-bisphosphoglycerate-dependent phosphoglycerate mutase activity);GO:0006094(gluconeogenesis);GO:0004619(phosphoglycerate mutase activity);GO:0004082(bisphosphoglycerate mutase activity);GO:0006096(glycolytic process);GO:0016868(intramolecular transferase activity, phosphotransferases);GO:0005829(cyto…	00010(Glycolysis / Gluconeogenesis);00260(Glycine, serine and threonine metabolism)	NA	NA	bisphosphoglycerate mutase [Source:HGNC Symbol;Acc:HGNC:1093]	60.7215	83.9225	57.806	42.3677	131.606	62.4903	84.4127	104.428	81.2636	22.7205	15.5002	6.35394	6.26931	12.6482	11.003	5.36159	9.19941
4769	0	chr1	-	74319821	74458552	ENSGALT00000037259	52	8788	MSTRG.2156	VWF	GO:0070062(extracellular exosome);GO:0033093(Weibel-Palade body);GO:0031012(extracellular matrix);GO:0005783(endoplasmic reticulum);GO:0005576(extracellular region);GO:0051260(protein homooligomerization);GO:0031589(cell-substrate adhesion);GO:0030168(platelet activation);GO:0007599(hemostasis);GO:0007596(blood coagulation);GO:0007155(cell adhesion);GO:0051087(chaperone binding);GO:0047485(protei…	04512(ECM-receptor interaction);04510(Focal adhesion)	NA	NA	von Willebrand factor [Source:HGNC Symbol;Acc:HGNC:12726]	21.4003	41.5595	37.9753	16.3416	25.695	18.4962	13.6443	15.6889	29.3295	12.6829	8.48358	7.82042	2.68127	4.13865	2.99039	1.57773	1.91993
5005	0	chr1	+	76879713	76888332	ENSGALT00000023307	7	3790	MSTRG.2206	TAPBPL	GO:0002590(negative regulation of antigen processing and presentation of peptide antigen via MHC class I);GO:0032403(protein complex binding);GO:0016021(integral component of membrane);GO:0016020(membrane)	NA	NA	NA	TAP binding protein like [Source:HGNC Symbol;Acc:HGNC:30683]	2.27281	1.32928	1.22076	1.46456	1.32593	4.20642	1.24502	0.441745	0.347385	0.123616	0.028873	0.182029	0.091743	0.156856	0	0	0.097267
5028	0	chr1	+	76952888	76956797	ENSGALT00000074237	11	1091	MSTRG.2216	GAPDH	GO:0097452(GAIT complex);GO:0070062(extracellular exosome);GO:0043231(intracellular membrane-bounded organelle);GO:0031982(vesicle);GO:0031965(nuclear membrane);GO:0031012(extracellular matrix);GO:0030529(intracellular ribonucleoprotein complex);GO:0016020(membrane);GO:0015630(microtubule cytoskeleton);GO:0005886(plasma membrane);GO:0005829(cytosol);GO:0005811(lipid droplet);GO:0005634(nucleus);G…	01200(Carbon metabolism);01230(Biosynthesis of amino acids);00010(Glycolysis / Gluconeogenesis)	NA	NA	Glyceraldehyde-3-phosphate dehydrogenase [Source:UniProtKB/Swiss-Prot;Acc:P00356]	177.177	903.444	235.428	1056.08	1623.52	680.497	89.0127	130.827	251.174	509.988	61.399	22.8496	12.6852	10.4165	10.0213	8.10291	65.0116
5031	0	chr1	+	76952888	76956805	ENSGALT00000023323	12	1288	MSTRG.2216	GAPDH	GO:0097452(GAIT complex);GO:0070062(extracellular exosome);GO:0043231(intracellular membrane-bounded organelle);GO:0031982(vesicle);GO:0031965(nuclear membrane);GO:0031012(extracellular matrix);GO:0030529(intracellular ribonucleoprotein complex);GO:0016020(membrane);GO:0015630(microtubule cytoskeleton);GO:0005886(plasma membrane);GO:0005829(cytosol);GO:0005811(lipid droplet);GO:0005634(nucleus);G…	01200(Carbon metabolism);01230(Biosynthesis of amino acids);00010(Glycolysis / Gluconeogenesis)	NA	NA	Glyceraldehyde-3-phosphate dehydrogenase [Source:UniProtKB/Swiss-Prot;Acc:P00356]	38252.4	3669.04	51337.8	4627.14	8018.14	4799.69	22658.1	29479.5	45605.5	3787.29	4227.41	4199.21	1583.69	1432.44	1127.73	1013.12	784.87
5033	0	chr1	+	76954032	76956800	ENSGALT00000086833	10	1122	MSTRG.2216	GAPDH	GO:0097452(GAIT complex);GO:0070062(extracellular exosome);GO:0043231(intracellular membrane-bounded organelle);GO:0031982(vesicle);GO:0031965(nuclear membrane);GO:0031012(extracellular matrix);GO:0030529(intracellular ribonucleoprotein complex);GO:0016020(membrane);GO:0015630(microtubule cytoskeleton);GO:0005886(plasma membrane);GO:0005829(cytosol);GO:0005811(lipid droplet);GO:0005634(nucleus);G…	01200(Carbon metabolism);01230(Biosynthesis of amino acids);00010(Glycolysis / Gluconeogenesis)	NA	NA	Glyceraldehyde-3-phosphate dehydrogenase [Source:UniProtKB/Swiss-Prot;Acc:P00356]	10.0527	85.2043	9.10671	96.7991	170.41	145.366	6.17284	11.491	12.1196	35.4883	1.62925	2.80127	0.555568	2.66132	1.06173	6.06321	5.8518
5035	0	chr1	+	76955283	76956800	ENSGALT00000090208	5	670	MSTRG.2216	GAPDH	GO:0097452(GAIT complex);GO:0070062(extracellular exosome);GO:0043231(intracellular membrane-bounded organelle);GO:0031982(vesicle);GO:0031965(nuclear membrane);GO:0031012(extracellular matrix);GO:0030529(intracellular ribonucleoprotein complex);GO:0016020(membrane);GO:0015630(microtubule cytoskeleton);GO:0005886(plasma membrane);GO:0005829(cytosol);GO:0005811(lipid droplet);GO:0005634(nucleus);G…	01200(Carbon metabolism);01230(Biosynthesis of amino acids);00010(Glycolysis / Gluconeogenesis)	NA	NA	Glyceraldehyde-3-phosphate dehydrogenase [Source:UniProtKB/Swiss-Prot;Acc:P00356]	5.42897	17.3465	3.2028	24.6838	39.0427	30.0832	7.87208	5.29354	10.2056	18.622	1.0113	2.85585	0.001007	1.75137	0.39349	0	1.61466
5056	0	chr1	-	76988085	77010194	ENSGALT00000023339	40	7056	MSTRG.2219	CHD4	GO:0043234(protein complex);GO:0016581(NuRD complex);GO:0032993(protein-DNA complex);GO:0016020(membrane);GO:0005813(centrosome);GO:0005654(nucleoplasm);GO:0005737(cytoplasm);GO:0005634(nucleus);GO:0000790(nuclear chromatin);GO:0043044(ATP-dependent chromatin remodeling);GO:0042826(histone deacetylase binding);GO:0031492(nucleosomal DNA binding);GO:0008134(transcription factor binding);GO:0001103…	NA	NA	NA	chromodomain helicase DNA binding protein 4 [Source:HGNC Symbol;Acc:HGNC:1919]	1.55001	1.32096	0.172551	1.21701	1.26186	2.10846	0.34761	5.19015	0.005793	0.545499	0.02065	0.115228	0.672475	0.034788	0.043594	0.249241	0.078759
5087	0	chr1	+	77151417	77154549	ENSGALT00000023360	7	1499	MSTRG.2224	COPS7A	GO:0005829(cytosol);GO:0008180(COP9 signalosome);GO:0005654(nucleoplasm);GO:0000338(protein deneddylation)	NA	NA	NA	COP9 signalosome subunit 7A [Source:HGNC Symbol;Acc:HGNC:16758]	17.1526	16.4968	12.9448	1.85521	18.86	17.5868	14.2907	16.9493	18.0995	9.34148	8.38236	0.571059	7.33193	7.93046	5.3548	6.52697	4.44223
5088	0	chr1	+	77151582	77154510	ENSGALT00000085822	7	1295	MSTRG.2224	COPS7A	GO:0005829(cytosol);GO:0008180(COP9 signalosome);GO:0005654(nucleoplasm);GO:0000338(protein deneddylation)	NA	NA	NA	COP9 signalosome subunit 7A [Source:HGNC Symbol;Acc:HGNC:16758]	16.5408	16.0593	12.811	36.1314	18.7683	17.0667	13.8703	16.4968	17.8596	10.8714	9.19061	21.1959	6.11837	7.27369	4.57181	7.43414	5.07033
5117	0	chr1	+	77274752	77277757	ENSGALT00000023442	7	1309	MSTRG.2238	ENSGALG00000014526	GO:0046166(glyceraldehyde-3-phosphate biosynthetic process);GO:0006098(pentose-phosphate shunt);GO:0019563(glycerol catabolic process);GO:0004807(triose-phosphate isomerase activity);GO:0006096(glycolytic process);GO:0006094(gluconeogenesis);GO:0005829(cytosol);GO:0016853(isomerase activity);GO:0008152(metabolic process);GO:0003824(catalytic activity)	01200(Carbon metabolism);01230(Biosynthesis of amino acids);00010(Glycolysis / Gluconeogenesis);00051(Fructose and mannose metabolism);00562(Inositol phosphate metabolism)	NA	NA	Triosephosphate isomerase [Source:UniProtKB/Swiss-Prot;Acc:P00940]	391.237	602.272	738.364	650.9	942.667	338.278	1046.26	784.398	642.576	49.8957	130.279	44.0379	174.319	39.4594	6.09865	16.4438	6.22224
5119	0	chr1	+	77274827	77277753	ENSGALT00000071768	8	1027	MSTRG.2238	ENSGALG00000014526	GO:0046166(glyceraldehyde-3-phosphate biosynthetic process);GO:0006098(pentose-phosphate shunt);GO:0019563(glycerol catabolic process);GO:0004807(triose-phosphate isomerase activity);GO:0006096(glycolytic process);GO:0006094(gluconeogenesis);GO:0005829(cytosol);GO:0016853(isomerase activity);GO:0008152(metabolic process);GO:0003824(catalytic activity)	01200(Carbon metabolism);01230(Biosynthesis of amino acids);00010(Glycolysis / Gluconeogenesis);00051(Fructose and mannose metabolism);00562(Inositol phosphate metabolism)	NA	NA	Triosephosphate isomerase [Source:UniProtKB/Swiss-Prot;Acc:P00940]	79.9633	210.82	154.016	162.952	182.511	162.305	135.082	210.727	174.843	27.791	13.4039	20.73	0.35282	5.44696	1.50975	2.81593	2.49334
5120	0	chr1	+	77274833	77277753	ENSGALT00000067267	6	1374	MSTRG.2238	ENSGALG00000014526	GO:0046166(glyceraldehyde-3-phosphate biosynthetic process);GO:0006098(pentose-phosphate shunt);GO:0019563(glycerol catabolic process);GO:0004807(triose-phosphate isomerase activity);GO:0006096(glycolytic process);GO:0006094(gluconeogenesis);GO:0005829(cytosol);GO:0016853(isomerase activity);GO:0008152(metabolic process);GO:0003824(catalytic activity)	01200(Carbon metabolism);01230(Biosynthesis of amino acids);00010(Glycolysis / Gluconeogenesis);00051(Fructose and mannose metabolism);00562(Inositol phosphate metabolism)	K01803	EC:5.3.1.1	Triosephosphate isomerase [Source:UniProtKB/Swiss-Prot;Acc:P00940]	306.393	496.131	563.128	595.25	655.263	349.103	713.931	800.843	755.274	33.2914	81.7313	37.0977	4.45024	36.3649	40.4914	12.5302	23.8116
5153	0	chr1	+	77379603	77388708	ENSGALT00000023545	12	2650	MSTRG.2245	C1S	GO:0072562(blood microparticle);GO:0070062(extracellular exosome);GO:0001867(complement activation, lectin pathway);GO:0042802(identical protein binding);GO:0004252(serine-type endopeptidase activity);GO:0006508(proteolysis);GO:0016787(hydrolase activity);GO:0008233(peptidase activity);GO:0005615(extracellular space);GO:0005509(calcium ion binding);GO:0006958(complement activation, classical path…	NA	NA	NA	complement C1s [Source:HGNC Symbol;Acc:HGNC:1247]	3.08137	4.58111	4.45483	7.95892	1.33289	14.4618	7.12805	4.93045	2.12988	1.05954	1.46348	1.36003	0.701018	1.35423	0.846852	0.533215	1.46974
5165	0	chr1	+	77434366	77444036	ENSGALT00000023661	15	1938	MSTRG.2256	PEX5	GO:0005794(Golgi apparatus);GO:0005829(cytosol);GO:0050905(neuromuscular process);GO:0048468(cell development);GO:0044255(cellular lipid metabolic process);GO:0040018(positive regulation of multicellular organism growth);GO:0021895(cerebral cortex neuron differentiation);GO:0021795(cerebral cortex cell migration);GO:0016558(protein import into peroxisome matrix);GO:0007031(peroxisome organization…	04146(Peroxisome)	NA	NA	peroxisomal biogenesis factor 5 [Source:HGNC Symbol;Acc:HGNC:9719]	4.98757	6.56735	6.45379	1.7325	8.1781	4.42075	5.64226	6.76617	0.164972	7.13624	6.14724	5.52637	2.92364	2.95728	1.64399	2.3572	2.889
5422	0	chr1	+	80014156	80099885	ENSGALT00000030475	10	1271	MSTRG.2356	GSK3B	GO:0030877(beta-catenin destruction complex);GO:0005886(plasma membrane);GO:0005813(centrosome);GO:0005737(cytoplasm);GO:0005634(nucleus);GO:1901216(positive regulation of neuron death);GO:0071109(superior temporal gyrus development);GO:0060070(canonical Wnt signaling pathway);GO:0051534(negative regulation of NFAT protein import into nucleus);GO:0046827(positive regulation of protein export from…	NA	NA	NA	glycogen synthase kinase 3 beta [Source:HGNC Symbol;Acc:HGNC:4617]	19.8393	22.2719	28.3003	16.3393	20.2252	23.6604	7.96582	18.5473	11.8842	2.15679	26.4436	0.21863	1.03116	0.796141	0.501131	0.97646	0.138804
5462	0	chr1	+	80446094	80476861	ENSGALT00000036952	11	2090	MSTRG.2379	CASQ2	GO:0033018(sarcoplasmic reticulum lumen);GO:0030314(junctional membrane complex);GO:0030018(Z disc);GO:0014802(terminal cisterna);GO:0005737(cytoplasm);GO:0005622(intracellular);GO:1901017(negative regulation of potassium ion transmembrane transporter activity);GO:0071313(cellular response to caffeine);GO:0060315(negative regulation of ryanodine-sensitive calcium-release channel activity);GO:0060…	NA	NA	NA	calsequestrin 2 [Source:HGNC Symbol;Acc:HGNC:1513]	248.641	322.779	291.005	484.622	428.08	321.589	408.698	357.24	429.05	109.155	134.509	114.527	127.596	150.339	64.6075	76.8926	82.0895
5811	0	chr1	+	84210854	84252641	ENSGALT00000051623	10	1867	MSTRG.2578	ST3GAL6	GO:0097503(sialylation);GO:0008373(sialyltransferase activity);GO:0006486(protein glycosylation);GO:0005794(Golgi apparatus);GO:0016757(transferase activity, transferring glycosyl groups);GO:0016740(transferase activity);GO:0016021(integral component of membrane);GO:0016020(membrane);GO:0052798(beta-galactoside alpha-2,3-sialyltransferase activity);GO:0009311(oligosaccharide metabolic process);GO…	00601(Glycosphingolipid biosynthesis - lacto and neolacto series)	K03792	EC:2.4.99.6	ST3 beta-galactoside alpha-2,3-sialyltransferase 6 [Source:HGNC Symbol;Acc:HGNC:18080]	2.06766	0.600269	0.389001	4.62043	1.84898	2.18317	1.40859	1.12676	2.32468	0.735674	1.23612	0.352878	0.150213	0.302566	0.325302	0	0
6195	0	chr1	-	91417916	91498347	ENSGALT00000024895	19	3018	MSTRG.2751	DCAF6	GO:0080008(Cul4-RING E3 ubiquitin ligase complex);GO:0005925(focal adhesion);GO:0005829(cytosol);GO:0005634(nucleus);GO:0045944(positive regulation of transcription from RNA polymerase II promoter);GO:0030374(ligand-dependent nuclear receptor transcription coactivator activity)	NA	NA	NA	DDB1 and CUL4 associated factor 6 [Source:HGNC Symbol;Acc:HGNC:30002]	77.6337	99.9834	58.9011	83.5786	83.512	41.5336	64.2414	75.4483	59.1673	40.2613	3.38468	43.6803	10.8346	10.2196	18.0865	4.51098	23.001
6259	0	chr1	-	92237349	92247857	ENSGALT00000030399	4	2184	MSTRG.2777	ADPRH	GO:0051725(protein de-ADP-ribosylation);GO:0006464(cellular protein modification process);GO:0003875(ADP-ribosylarginine hydrolase activity);GO:0000287(magnesium ion binding);GO:0030955(potassium ion binding)	NA	NA	NA	ADP-ribosylarginine hydrolase [Source:HGNC Symbol;Acc:HGNC:269]	5.62572	8.09782	8.02279	12.7839	7.46582	8.76506	6.12414	7.14414	8.21543	4.85619	5.32537	4.05626	1.84107	1.95592	0.558726	1.7406	1.51418
6514	0	chr1	+	98607010	98696454	ENSGALT00000025309	26	4488	MSTRG.2935	USP25	GO:0005829(cytosol);GO:0005783(endoplasmic reticulum);GO:1904293(negative regulation of ERAD pathway);GO:0071108(protein K48-linked deubiquitination);GO:0070536(protein K63-linked deubiquitination);GO:0016579(protein deubiquitination);GO:0051117(ATPase binding);GO:0031625(ubiquitin protein ligase binding);GO:0004843(thiol-dependent ubiquitin-specific protease activity);GO:0036459(thiol-dependent …	NA	NA	NA	ubiquitin specific peptidase 25 [Source:HGNC Symbol;Acc:HGNC:12624]	76.4142	21.4695	46.5265	32.2273	17.7561	7.44721	3.72909	6.60294	6.19434	11.5032	16.4088	0.631482	0.948215	0.275688	0.140627	0.599425	0.35466
7047	0	chr1	-	109155882	109161762	ENSGALT00000026015	3	3148	MSTRG.3142	ZBTB21	GO:0005829(cytosol);GO:0005654(nucleoplasm);GO:0005634(nucleus);GO:0008327(methyl-CpG binding);GO:0003676(nucleic acid binding)	NA	NA	NA	zinc finger and BTB domain containing 21 [Source:HGNC Symbol;Acc:HGNC:13083]	2.97336	1.94632	1.37756	0.648077	0.226993	0.688538	1.77072	0.734941	0.408929	0.361024	0	0.740788	0.138527	0	0	0	0.346365
7099	0	chr1	-	109907383	109920133	ENSGALT00000052958	13	5068	MSTRG.3165	ENSGALG00000041988	NA	NA	NA	NA	NA	98.9772	58.4244	99.9065	43.2177	37.839	36.4761	55.2447	57.9145	66.4929	12.1949	8.95415	6.38167	5.42296	5.61071	4.54269	7.81999	7.45722
7241	0	chr1	-	112021560	112038987	ENSGALT00000026171	17	4511	MSTRG.3231	ENSGALG00000016231	GO:0004386(helicase activity);GO:0016787(hydrolase activity);GO:0003676(nucleic acid binding);GO:0005524(ATP binding);GO:0000166(nucleotide binding)	04622(RIG-I-like receptor signaling pathway)	K11594	EC:3.6.4.13	NA	220.715	179.249	196.934	75.244	63.3246	71.5182	49.0216	74.4409	45.9882	28.0905	27.4335	17.5867	21.6965	19.3239	35.4031	35.5742	34.1736
7996	0	chr1	-	125174591	125314711	ENSGALT00000057245	15	6058	MSTRG.3549	ENSGALG00000040006	NA	04310(Wnt signaling pathway)	NA	NA	NA	14.0697	15.0344	9.11021	11.4017	12.0672	0.439522	10.5968	9.82343	10.7162	1.5676	4.36145	0.606085	0.26965	7.59488	1.6528	0.774022	2.63686
8176	0	chr1	-	130158053	130170776	ENSGALT00000026988	7	1238	MSTRG.3653	RGN	GO:0005737(cytoplasm);GO:0005634(nucleus);GO:0019853(L-ascorbic acid biosynthetic process);GO:0008270(zinc ion binding);GO:0005509(calcium ion binding);GO:0004341(gluconolactonase activity);GO:0030234(enzyme regulator activity);GO:0050790(regulation of catalytic activity)	01200(Carbon metabolism);00030(Pentose phosphate pathway);00053(Ascorbate and aldarate metabolism)	K01053	EC:3.1.1.17	regucalcin [Source:HGNC Symbol;Acc:HGNC:9989]	5.43227	4.30729	4.8854	5.54667	4.11278	3.04137	4.58042	4.3235	2.69237	1.9236	3.45756	1.44514	2.3302	1.84468	1.8321	2.19238	1.31462
8509	0	chr1	-	135229984	135269293	ENSGALT00000083922	6	1610	MSTRG.3765	FHL2	GO:0005925(focal adhesion);GO:0005634(nucleus);GO:0060347(heart trabecula formation);GO:0055015(ventricular cardiac muscle cell development);GO:0055014(atrial cardiac muscle cell development);GO:0045892(negative regulation of transcription, DNA-templated);GO:0043066(negative regulation of apoptotic process);GO:0009725(response to hormone);GO:0006357(regulation of transcription from RNA polymerase…	NA	NA	NA	four and a half LIM domains 2 [Source:HGNC Symbol;Acc:HGNC:3703]	1.14235	3.33957	2.73685	4.90491	4.29047	0.805692	1.60365	2.10802	5.53927	0.440912	0	0	0.419744	0	0	0.210795	0
9697	0	chr1	-	167750776	167754933	ENSGALT00000044027	6	1050	MSTRG.4284	TPT1	GO:0005771(multivesicular body);GO:0005829(cytosol);GO:0005654(nucleoplasm);GO:0005615(extracellular space);GO:2000384(negative regulation of ectoderm development);GO:0019827(stem cell population maintenance);GO:0045298(tubulin complex);GO:0008134(transcription factor binding);GO:0005509(calcium ion binding);GO:0030154(cell differentiation);GO:0008017(microtubule binding);GO:0005737(cytoplasm)	NA	NA	NA	tumor protein, translationally-controlled 1 [Source:HGNC Symbol;Acc:HGNC:12022]	833.043	1028.72	649.03	877.246	1008.17	727.757	927.14	741.225	878.709	478.117	654.884	706.466	600.176	661.801	377.687	410.315	380.645
9931	0	chr1	+	170645372	170650784	ENSGALT00000053737	2	409	MSTRG.4380	ENSGALG00000032186	NA	NA	NA	NA	NA	9.35487	4.62771	6.55088	0.750437	1.5942	1.20198	2.28621	5.08431	1.55747	1.49206	0.389077	1.71395	1.26215	0.933577	0.458783	0.597736	0.122518
10108	0	chr1	-	174247036	174291621	ENSGALT00000027569	5	3000	MSTRG.4479	KL	GO:0070062(extracellular exosome);GO:0090080(positive regulation of MAPKKK cascade by fibroblast growth factor receptor signaling pathway);GO:0055074(calcium ion homeostasis);GO:0030501(positive regulation of bone mineralization);GO:0008543(fibroblast growth factor receptor signaling pathway);GO:0007568(aging);GO:0006112(energy reserve metabolic process);GO:0017134(fibroblast growth factor bindin…	00040(Pentose and glucuronate interconversions)	K14756	EC:3.2.1.31	klotho [Source:HGNC Symbol;Acc:HGNC:6344]	4.04685	3.75443	1.45296	2.95648	1.61284	2.60872	0.289912	0.735363	0.340451	1.35197	0.526426	1.37119	0.687253	0.488832	0.21193	0.272886	0.428868
10474	0	chr1	+	178883375	178933935	ENSGALT00000027680	8	3224	MSTRG.4636	CRYL1	GO:0070062(extracellular exosome);GO:0070403(NAD+ binding);GO:0050104(L-gulonate 3-dehydrogenase activity);GO:0042803(protein homodimerization activity);GO:0006631(fatty acid metabolic process);GO:0003857(3-hydroxyacyl-CoA dehydrogenase activity);GO:0016491(oxidoreductase activity);GO:0055114(oxidation-reduction process);GO:0016021(integral component of membrane);GO:0016020(membrane)	00040(Pentose and glucuronate interconversions)	NA	NA	crystallin lambda 1 [Source:HGNC Symbol;Acc:HGNC:18246]	7.00457	6.32078	3.75241	7.79163	8.29965	5.51807	9.11493	9.35299	9.0295	2.70398	2.33013	2.36382	0.97356	1.73852	1.42123	2.34999	1.86624
11079	0	chr1	+	192926253	192929784	ENSGALT00000075820	3	543	MSTRG.4922	ENSGALG00000029172	GO:0005739(mitochondrion);GO:0005743(mitochondrial inner membrane);GO:0006120(mitochondrial electron transport, NADH to ubiquinone);GO:0070469(respiratory chain);GO:0055114(oxidation-reduction process);GO:0008137(NADH dehydrogenase (ubiquinone) activity);GO:0016020(membrane)	00190(Oxidative phosphorylation)	NA	NA	NA	24.6959	25.5961	15.3672	26.3097	23.3581	28.6182	20.6137	21.4529	13.9544	2.08844	16.8489	23.4991	6.09418	7.23484	9.40366	8.1469	7.11534
11225	0	chr1	+	194374562	194375192	ENSGALT00000062177	3	453	MSTRG.4978	ENSGALG00000035308	NA	NA	NA	NA	NA	3.17286	7.69756	5.7725	3.32845	2.73813	11.6435	3.40112	2.89481	5.73223	0.939465	9.93384	0.751218	0.686109	0.46166	0.49652	0.873673	0.536144
11347	0	chr1	-	194877499	194892393	ENSGALT00000081836	8	1077	MSTRG.5035	DGAT2	GO:0019432(triglyceride biosynthetic process);GO:0016020(membrane);GO:0048471(perinuclear region of cytoplasm);GO:0042803(protein homodimerization activity);GO:0005783(endoplasmic reticulum);GO:0005739(mitochondrion);GO:0016021(integral component of membrane);GO:0046339(diacylglycerol metabolic process);GO:0042632(cholesterol homeostasis);GO:0005811(lipid droplet);GO:0003846(2-acylglycerol O-acyl…	00561(Glycerolipid metabolism)	NA	NA	diacylglycerol O-acyltransferase 2 [Source:HGNC Symbol;Acc:HGNC:16940]	2.36421	9.52052	1.40769	7.26218	14.2063	7.84723	5.8788	8.93558	9.40577	1.6265	2.24005	2.35333	0	1.01782	1.1669	0.00439	0.51313
11508	0	chr1	+	196014741	196048973	ENSGALT00000036353	14	1866	MSTRG.5107	PGM2L1	GO:0047933(glucose-1,6-bisphosphate synthase activity);GO:0016310(phosphorylation);GO:0071704(organic substance metabolic process);GO:0016868(intramolecular transferase activity, phosphotransferases);GO:0005829(cytosol);GO:0005975(carbohydrate metabolic process)	00500(Starch and sucrose metabolism)	NA	NA	phosphoglucomutase 2 like 1 [Source:HGNC Symbol;Acc:HGNC:20898]	27.6781	39.9847	40.8865	33.3555	34.5438	24.5406	0	22.2828	41.633	1.73923	3.59259	4.37275	0	2.37133	2.9011	3.03354	3.47286
11581	0	chr10	-	815996	845140	ENSGALT00000053768	14	4652	MSTRG.5117	ALPK3	NA	NA	NA	NA	alpha kinase 3 [Source:HGNC Symbol;Acc:HGNC:17574]	103.944	87.939	91.5695	84.7246	97.0291	112.494	65.2225	74.6361	71.9025	85.518	47.3756	51.4932	14.2478	15.5105	6.47682	1.67265	8.05573
11649	0	chr10	+	1254940	1257208	ENSGALT00000040255	4	1077	MSTRG.5131	B2M	GO:1990712(HFE-transferrin receptor complex);GO:0070062(extracellular exosome);GO:0042612(MHC class I protein complex);GO:0016020(membrane);GO:0009897(external side of plasma membrane);GO:0005925(focal adhesion);GO:0005886(plasma membrane);GO:0005829(cytosol);GO:0005794(Golgi apparatus);GO:0005615(extracellular space);GO:1904437(positive regulation of transferrin receptor binding);GO:1904434(posi…	NA	NA	NA	beta-2-microglobulin [Source:HGNC Symbol;Acc:HGNC:914]	65.4389	90.4538	55.5362	58.4132	48.6063	124.056	17.0531	25.6891	14.8191	6.22121	6.8192	8.69694	12.8425	1.37886	3.11091	1.1681	6.27907
11703	0	chr10	-	1506437	1523684	ENSGALT00000003100	11	2354	MSTRG.5135	PKM	GO:1903561(extracellular vesicle);GO:0070062(extracellular exosome);GO:0043209(myelin sheath);GO:0031982(vesicle);GO:0031012(extracellular matrix);GO:0005929(cilium);GO:0005829(cytosol);GO:0005739(mitochondrion);GO:0005634(nucleus);GO:0005737(cytoplasm);GO:0012501(programmed cell death);GO:0006096(glycolytic process);GO:0045296(cadherin binding);GO:0030955(potassium ion binding);GO:0023026(MHC cl…	01200(Carbon metabolism);01230(Biosynthesis of amino acids);00010(Glycolysis / Gluconeogenesis);00620(Pyruvate metabolism);00230(Purine metabolism)	NA	NA	pyruvate kinase M1/2 [Source:HGNC Symbol;Acc:HGNC:9021]	2045.93	3133.14	4184.5	3194.59	3797.92	3567.8	2853.88	3621.1	4330	509.867	461.423	425.929	75.8501	62.7765	16.6236	27.3515	18.8178
11704	0	chr10	-	1506858	1520285	ENSGALT00000062553	12	1851	MSTRG.5135	PKM	GO:1903561(extracellular vesicle);GO:0070062(extracellular exosome);GO:0043209(myelin sheath);GO:0031982(vesicle);GO:0031012(extracellular matrix);GO:0005929(cilium);GO:0005829(cytosol);GO:0005739(mitochondrion);GO:0005634(nucleus);GO:0005737(cytoplasm);GO:0012501(programmed cell death);GO:0006096(glycolytic process);GO:0045296(cadherin binding);GO:0030955(potassium ion binding);GO:0023026(MHC cl…	01200(Carbon metabolism);01230(Biosynthesis of amino acids);00010(Glycolysis / Gluconeogenesis);00620(Pyruvate metabolism);00230(Purine metabolism)	K00873	EC:2.7.1.40	pyruvate kinase M1/2 [Source:HGNC Symbol;Acc:HGNC:9021]	7.39653	9.80423	15.0398	8.65365	13.3774	62.6071	10.0941	14.1353	20.2246	1.04819	2.9939	2.56142	0	0.519343	0.310725	0	0.126381
12127	0	chr10	+	4082418	4086399	ENSGALT00000050649	4	639	MSTRG.5275	RPS27L	GO:0042771(intrinsic apoptotic signaling pathway in response to DNA damage by p53 class mediator);GO:0006281(DNA repair);GO:0003723(RNA binding);GO:0005634(nucleus);GO:0008494(translation activator activity);GO:0008656(cysteine-type endopeptidase activator activity involved in apoptotic process);GO:0006919(activation of cysteine-type endopeptidase activity involved in apoptotic process);GO:000697…	03010(Ribosome)	NA	NA	ribosomal protein S27 like [Source:HGNC Symbol;Acc:HGNC:18476]	4.41136	13.8514	8.2752	4.92224	19.8805	10.7843	7.0904	6.14295	9.62634	0.842786	2.79811	0.949792	0.688451	0.225521	0.839038	0.181412	0.928888
12128	0	chr10	+	4082608	4086397	ENSGALT00000087078	3	523	MSTRG.5275	RPS27L	GO:0042771(intrinsic apoptotic signaling pathway in response to DNA damage by p53 class mediator);GO:0006281(DNA repair);GO:0003723(RNA binding);GO:0005634(nucleus);GO:0008494(translation activator activity);GO:0008656(cysteine-type endopeptidase activator activity involved in apoptotic process);GO:0006919(activation of cysteine-type endopeptidase activity involved in apoptotic process);GO:000697…	03010(Ribosome)	K02978	NA	ribosomal protein S27 like [Source:HGNC Symbol;Acc:HGNC:18476]	1.33241	4.78235	4.65552	3.41131	5.43478	5.30522	1.39501	1.69771	0.323449	0.303018	0.573003	0.119792	1.45813	0.447689	0.355231	0.546514	0.579192
12134	0	chr10	-	4105084	4124080	ENSGALT00000084241	9	2189	MSTRG.5291	ENSGALG00000003521	GO:0046982(protein heterodimerization activity);GO:0008092(cytoskeletal protein binding);GO:0005515(protein binding);GO:0060048(cardiac muscle contraction);GO:0005884(actin filament);GO:0005862(muscle thin filament tropomyosin);GO:0042803(protein homodimerization activity);GO:0005886(plasma membrane);GO:0007015(actin filament organization);GO:0008307(structural constituent of muscle);GO:0051015(a…	04260(Cardiac muscle contraction);04261(Adrenergic signaling in cardiomyocytes)	NA	NA	NA	31.6314	28.5689	38.4215	71.0591	75.5615	44.9088	65.3305	72.478	50.3032	11.7224	14.3566	14.9078	11.6543	25.0116	4.72244	7.56214	7.2468
12138	0	chr10	-	4110442	4124077	ENSGALT00000005572	10	1295	MSTRG.5291	ENSGALG00000003521	GO:0046982(protein heterodimerization activity);GO:0008092(cytoskeletal protein binding);GO:0005515(protein binding);GO:0060048(cardiac muscle contraction);GO:0005884(actin filament);GO:0005862(muscle thin filament tropomyosin);GO:0042803(protein homodimerization activity);GO:0005886(plasma membrane);GO:0007015(actin filament organization);GO:0008307(structural constituent of muscle);GO:0051015(a…	04260(Cardiac muscle contraction);04261(Adrenergic signaling in cardiomyocytes)	NA	NA	NA	2989.25	3490.08	1772.72	3090.08	2444.61	3162.84	2286.04	1721.46	1960.34	1178.58	1054.61	1196.27	202.613	95.2479	123.152	23.1182	32.3919
12966	0	chr10	+	13033323	13040620	ENSGALT00000010834	10	2588	MSTRG.5591	MFGE8	GO:1903561(extracellular vesicle);GO:0070062(extracellular exosome);GO:0031012(extracellular matrix);GO:0019897(extrinsic component of plasma membrane);GO:0016020(membrane);GO:0009897(external side of plasma membrane);GO:0005615(extracellular space);GO:2000427(positive regulation of apoptotic cell clearance);GO:0050766(positive regulation of phagocytosis);GO:0006911(phagocytosis, engulfment);GO:0…	NA	NA	NA	lactadherin isoform 2 precursor [Source:RefSeq peptide;Acc:NP_001264040]	22.4341	27.9204	22.8565	10.9475	11.1569	8.7518	2.34123	10.7169	16.5498	18.6657	11.8012	14.6111	4.79608	8.05016	2.59767	5.9585	4.34929
13053	0	chr10	-	13979803	14002167	ENSGALT00000011071	22	3189	MSTRG.5631	ENSGALG00000006840	GO:0004691(cAMP-dependent protein kinase activity);GO:0006468(protein phosphorylation);GO:0035023(regulation of Rho protein signal transduction);GO:0005089(Rho guanyl-nucleotide exchange factor activity);GO:0005622(intracellular);GO:0035556(intracellular signal transduction);GO:0065009(regulation of molecular function)	NA	NA	NA	NA	2.25865	5.4928	4.34688	4.43401	0.019353	0.492338	0.007483	0.004457	0.854671	0.011596	2.94147	0.019253	0.030919	0.029241	0.029762	0.056482	0.019543
13232	0	chr10	+	16877250	16897766	ENSGALT00000033905	4	8601	MSTRG.5756	SYNM	GO:0060053(neurofilament cytoskeleton);GO:0045111(intermediate filament cytoskeleton);GO:0043034(costamere);GO:0042383(sarcolemma);GO:0016020(membrane);GO:0005912(adherens junction);GO:0005882(intermediate filament);GO:0031443(fast-twitch skeletal muscle fiber contraction);GO:0019215(intermediate filament binding);GO:0017166(vinculin binding);GO:0008307(structural constituent of muscle);GO:000520…	NA	NA	NA	synemin [Source:HGNC Symbol;Acc:HGNC:24466]	30.8338	18.315	9.04863	14.4587	9.08216	6.26877	7.01025	4.83892	1.55494	2.60404	2.42549	6.35792	0.959064	0.620628	0.528777	0.795067	1.33892
13240	0	chr10	+	16917711	16966856	ENSGALT00000011432	10	2022	MSTRG.5761	LRRC28	GO:0007165(signal transduction)	NA	NA	NA	leucine rich repeat containing 28 [Source:HGNC Symbol;Acc:HGNC:28355]	3.69215	2.75989	2.07947	2.26058	2.85658	2.41373	1.95875	1.0879	1.74776	0.197753	1.27885	0.189167	0.282389	0.253639	0.014193	0	0.212023
13328	0	chr10	-	17645102	17650113	ENSGALT00000011612	9	945	MSTRG.5784	SNRPA1	GO:0071013(catalytic step 2 spliceosome);GO:0016607(nuclear speck);GO:0005681(spliceosomal complex);GO:0003723(RNA binding);GO:0030620(U2 snRNA binding);GO:0005686(U2 snRNP);GO:0000398(mRNA splicing, via spliceosome)	03040(Spliceosome)	NA	NA	small nuclear ribonucleoprotein polypeptide A' [Source:HGNC Symbol;Acc:HGNC:11152]	20.9753	8.85956	15.7341	21.9707	2.01221	25.2922	1.70058	3.90723	25.2773	1.33691	0.889435	2.22228	1.7	8.43681	1.82289	2.63695	2.67665
13871	0	chr11	-	614088	620331	ENSGALT00000001797	9	1073	MSTRG.5984	COQ9	GO:0005739(mitochondrion);GO:0006744(ubiquinone biosynthetic process);GO:0006120(mitochondrial electron transport, NADH to ubiquinone);GO:0042803(protein homodimerization activity);GO:0008289(lipid binding);GO:0005743(mitochondrial inner membrane)	NA	NA	NA	coenzyme Q9 [Source:HGNC Symbol;Acc:HGNC:25302]	107.389	114.428	109.8	139.167	158.367	114.984	125.588	153.184	203.87	77.7319	61.0057	74.1819	7.54161	22.0459	18.6833	11.1971	16.6642
13903	0	chr11	+	661331	665530	ENSGALT00000001852	7	999	MSTRG.5991	HERPUD1	GO:1990037(Lewy body core);GO:0034704(calcium channel complex);GO:0016021(integral component of membrane);GO:0016020(membrane);GO:0005789(endoplasmic reticulum membrane);GO:0005783(endoplasmic reticulum);GO:2001243(negative regulation of intrinsic apoptotic signaling pathway);GO:1903071(positive regulation of ER-associated ubiquitin-dependent protein catabolic process);GO:1903069(regulation of ER…	NA	NA	NA	homocysteine inducible ER protein with ubiquitin like domain 1 [Source:HGNC Symbol;Acc:HGNC:13744]	1.74418	1.68129	3.99132	2.26682	0.806886	6.05445	2.27135	0.521187	0.926476	0	0	0.296668	0	0.486937	0.162397	0.333448	0
13904	0	chr11	+	668620	674247	ENSGALT00000001871	16	2002	MSTRG.5992	CETP	GO:0070062(extracellular exosome);GO:0034364(high-density lipoprotein particle);GO:0031982(vesicle);GO:0005615(extracellular space);GO:0070328(triglyceride homeostasis);GO:0055091(phospholipid homeostasis);GO:0055088(lipid homeostasis);GO:0046470(phosphatidylcholine metabolic process);GO:0043691(reverse cholesterol transport);GO:0042632(cholesterol homeostasis);GO:0034375(high-density lipoprotein…	NA	NA	NA	cholesteryl ester transfer protein [Source:HGNC Symbol;Acc:HGNC:1869]	3.26416	7.0595	2.92841	2.48242	3.66812	2.0823	1.64483	1.79729	0.449612	0.634683	0.372735	0.510375	0.49441	0.880215	0.851082	0.249083	0.50442
14198	0	chr11	+	2223302	2243233	ENSGALT00000004906	14	1923	MSTRG.6053	AMFR	GO:0048471(perinuclear region of cytoplasm);GO:0043234(protein complex);GO:0036513(Derlin-1 retrotranslocation complex);GO:0030176(integral component of endoplasmic reticulum membrane);GO:0016020(membrane);GO:0005794(Golgi apparatus);GO:0005789(endoplasmic reticulum membrane);GO:0005783(endoplasmic reticulum);GO:0070936(protein K48-linked ubiquitination);GO:0051865(protein autoubiquitination);GO:…	04141(Protein processing in endoplasmic reticulum)	K10636	EC:2.3.2.27	autocrine motility factor receptor [Source:HGNC Symbol;Acc:HGNC:463]	34.7866	55.7976	46.4808	41.1289	48.9189	44.519	24.7308	30.3577	35.896	19.6729	19.3165	17.3425	12.7374	9.86308	14.2657	10.0478	12.4794
14434	0	chr11	-	6773498	6779373	ENSGALT00000065469	6	1699	MSTRG.6196	CNEP1R1	NA	NA	NA	NA	CTD nuclear envelope phosphatase 1 regulatory subunit 1 [Source:HGNC Symbol;Acc:HGNC:26759]	8.02186	2.46016	0.782755	4.66176	1.98253	1.18206	3.53966	4.12181	2.65512	1.65352	1.00818	2.48094	0.374023	0.514904	2.16683	0.515543	1.23576
14495	0	chr11	+	7701484	7772649	ENSGALT00000006444	18	2001	MSTRG.6212	ITFG1	GO:0070062(extracellular exosome);GO:0016021(integral component of membrane);GO:0016020(membrane)	NA	NA	NA	integrin alpha FG-GAP repeat containing 1 [Source:HGNC Symbol;Acc:HGNC:30697]	25.3721	22.1051	10.8906	27.019	25.6903	23.5876	11.3748	23.7559	15.1672	6.38397	8.19365	7.47125	6.45779	1.88339	5.1969	7.70649	5.60231
14755	0	chr11	+	11103487	11124330	ENSGALT00000007948	18	2044	MSTRG.6351	GPI	GO:0070062(extracellular exosome);GO:0060170(ciliary membrane);GO:0043209(myelin sheath);GO:0016020(membrane);GO:0005886(plasma membrane);GO:0005829(cytosol);GO:0005654(nucleoplasm);GO:0005615(extracellular space);GO:0042593(glucose homeostasis);GO:0034101(erythrocyte homeostasis);GO:0006096(glycolytic process);GO:0006094(gluconeogenesis);GO:0001707(mesoderm formation);GO:0031625(ubiquitin protei…	01200(Carbon metabolism);00010(Glycolysis / Gluconeogenesis);00030(Pentose phosphate pathway);00500(Starch and sucrose metabolism);00520(Amino sugar and nucleotide sugar metabolism)	NA	NA	glucose-6-phosphate isomerase [Source:HGNC Symbol;Acc:HGNC:4458]	679.887	232.762	852.407	849.949	898.794	637.764	619.135	1015.05	1042.85	95.9185	20.3345	58.3973	31.9364	38.5687	53.9912	71.5393	87.8827
15044	0	chr11	+	16185639	16626612	ENSGALT00000008808	14	3937	MSTRG.6528	CDH13	GO:0070062(extracellular exosome);GO:0043005(neuron projection);GO:0009897(external side of plasma membrane);GO:0005925(focal adhesion);GO:0005901(caveola);GO:0005886(plasma membrane);GO:0005737(cytoplasm);GO:0005615(extracellular space);GO:0055096(low-density lipoprotein particle mediated signaling);GO:0051668(localization within membrane);GO:0050927(positive regulation of positive chemotaxis);G…	NA	NA	NA	Cadherin-13 [Source:UniProtKB/Swiss-Prot;Acc:P33150]	28.5395	27.8416	20.2824	35.9719	33.34	27.0073	37.0608	24.0769	23.6234	18.8186	24.3228	13.2437	12.8834	14.624	14.3584	9.03975	10.9844
15386	0	chr11	-	19316620	19321784	ENSGALT00000001001	7	949	MSTRG.6661	PSMD7	GO:0070062(extracellular exosome);GO:0016020(membrane);GO:0005838(proteasome regulatory particle);GO:0005654(nucleoplasm);GO:0005634(nucleus);GO:0000502(proteasome complex);GO:0042803(protein homodimerization activity);GO:0043161(proteasome-mediated ubiquitin-dependent protein catabolic process)	03050(Proteasome)	K03038	NA	proteasome 26S subunit, non-ATPase 7 [Source:HGNC Symbol;Acc:HGNC:9565]	42.9785	44.0455	30.3851	52.2444	48.0726	43.1518	40.9225	37.0088	37.7109	15.7008	22.5928	17.369	13.1152	9.86663	12.8274	16.6206	17.9371
15554	0	chr12	-	688340	712926	ENSGALT00000055942	14	1868	MSTRG.6719	NT5DC2	NA	NA	NA	NA	5'-nucleotidase domain containing 2 [Source:HGNC Symbol;Acc:HGNC:25717]	62.9378	124.284	76.1718	101.843	86.7217	77.9197	34.3198	96.5075	103.305	47.0961	43.4579	60.7948	54.5354	67.7617	31.1189	46.7694	32.6297
15933	0	chr12	-	3122801	3126465	ENSGALT00000085569	14	1521	MSTRG.6872	ENSGALG00000042984	NA	01210(2-Oxocarboxylic acid metabolism);01230(Biosynthesis of amino acids);00220(Arginine biosynthesis)	NA	NA	NA	20.1273	36.3216	39.4678	28.8979	36.8408	30.5693	33.6085	50.7836	41.0313	11.3511	7.63304	10.1904	3.27659	3.38442	5.76016	6.18285	7.15681
16508	0	chr12	-	8934103	8937705	ENSGALT00000036253	8	1187	MSTRG.7119	DNASE1L3	GO:0005783(endoplasmic reticulum);GO:0005634(nucleus);GO:0010623(programmed cell death involved in cell development);GO:0006309(apoptotic DNA fragmentation);GO:0004536(deoxyribonuclease activity);GO:0006308(DNA catabolic process);GO:0004519(endonuclease activity);GO:0004518(nuclease activity);GO:0016787(hydrolase activity)	NA	NA	NA	deoxyribonuclease 1 like 3 [Source:HGNC Symbol;Acc:HGNC:2959]	6.24043	2.64326	7.13996	5.12851	4.65057	3.90935	3.33422	4.43622	5.80876	1.79356	3.30423	3.20178	0.737898	0.370508	0.335909	0	0.467431
16899	0	chr12	-	11697397	11726287	ENSGALT00000011269	15	2794	MSTRG.7255	ARIH2	GO:0031466(Cul5-RING ubiquitin ligase complex);GO:0005737(cytoplasm);GO:0005654(nucleoplasm);GO:0005634(nucleus);GO:1903955(positive regulation of protein targeting to mitochondrion);GO:0071425(hematopoietic stem cell proliferation);GO:0070936(protein K48-linked ubiquitination);GO:0070534(protein K63-linked ubiquitination);GO:0048588(developmental cell growth);GO:0042787(protein ubiquitination in…	NA	NA	NA	ariadne RBR E3 ubiquitin protein ligase 2 [Source:HGNC Symbol;Acc:HGNC:690]	22.1328	13.4287	15.2417	19.4621	15.0458	14.0686	11.8559	9.16069	12.434	7.20404	6.9075	5.33292	4.39608	2.41146	5.62261	3.81907	5.99632
17381	0	chr12	+	19497951	19512399	ENSGALT00000013716	15	3714	MSTRG.7509	CAND2	GO:0005634(nucleus);GO:0005622(intracellular);GO:0010265(SCF complex assembly);GO:0016567(protein ubiquitination);GO:0017025(TBP-class protein binding)	NA	NA	NA	cullin associated and neddylation dissociated 2 (putative) [Source:HGNC Symbol;Acc:HGNC:30689]	91.2856	88.0924	84.2149	95.8771	103.574	82.8701	63.5854	91.4824	101.983	43.0099	41.5335	48.7207	9.32472	11.7826	9.20783	5.04257	5.31215
17545	0	chr13	+	1458573	1480966	ENSGALT00000071467	3	766	MSTRG.7586	CYSTM1	GO:0070062(extracellular exosome)	NA	NA	NA	cysteine rich transmembrane module containing 1 [Source:HGNC Symbol;Acc:HGNC:30239]	5.23107	7.75047	4.7942	5.46981	4.73191	5.5127	5.9618	4.64057	4.0065	5.34607	3.10173	4.25546	5.46598	2.33998	2.09136	1.21943	2.17313
17557	0	chr13	-	1515672	1521782	ENSGALT00000001401	6	816	MSTRG.7588	HBEGF	GO:0005515(protein binding);GO:0008201(heparin binding);GO:0005154(epidermal growth factor receptor binding);GO:0008284(positive regulation of cell proliferation);GO:0008083(growth factor activity);GO:0007173(epidermal growth factor receptor signaling pathway);GO:0005615(extracellular space);GO:0005887(integral component of plasma membrane);GO:0005886(plasma membrane);GO:0005576(extracellular reg…	04012(ErbB signaling pathway);04912(GnRH signaling pathway)	K08523	NA	heparin binding EGF like growth factor [Source:HGNC Symbol;Acc:HGNC:3059]	1.91804	3.28843	4.34304	1.32168	5.17429	1.67993	2.88533	1.41967	4.29652	1.47813	0.52005	0.708957	0.520896	0.280084	0	0.167708	0.05753
17903	0	chr13	-	6736928	6741308	ENSGALT00000002636	7	1284	MSTRG.7743	CCNG1	GO:0051726(regulation of cell cycle)	04115(p53 signaling pathway)	K10145	NA	cyclin G1 [Source:HGNC Symbol;Acc:HGNC:1592]	31.7545	45.4561	28.7353	45.378	28.7893	14.387	35.1338	21.2319	25.007	14.8854	10.9385	8.90006	11.3668	12.1746	8.49907	7.76787	10.9094
18255	0	chr13	-	10415328	10415928	ENSGALT00000005300	2	455	MSTRG.7874	ENSGALG00000003348	GO:0005739(mitochondrion);GO:0097250(mitochondrial respiratory chain supercomplex assembly);GO:0016021(integral component of membrane);GO:0016020(membrane)	NA	NA	NA	NA	8.64846	14.0958	7.1859	10.1478	0.089728	0.101391	2.1307	3.06066	15.242	1.05505	8.86901	3.19348	0.836035	0.411442	1.13852	1.58046	0.223568
18355	0	chr13	-	11524677	11645193	ENSGALT00000006182	8	876	MSTRG.7912	SGCD	GO:0042383(sarcolemma);GO:0016012(sarcoglycan complex);GO:0016011(dystroglycan complex);GO:0016010(dystrophin-associated glycoprotein complex);GO:0061024(membrane organization);GO:0060047(heart contraction);GO:0055001(muscle cell development);GO:0048738(cardiac muscle tissue development);GO:0007517(muscle organ development);GO:0016021(integral component of membrane);GO:0016020(membrane)	NA	NA	NA	sarcoglycan delta [Source:HGNC Symbol;Acc:HGNC:10807]	32.1755	36.6026	13.9847	52.6195	51.4288	59.5704	55.8417	67.0781	62.1092	2.22662	21.9128	5.40669	3.38444	3.275	1.21521	0.460351	0.177077
18390	0	chr13	-	12146904	12152729	ENSGALT00000042934	4	537	MSTRG.7914	SAP30L	GO:0016575(histone deacetylation);GO:0000118(histone deacetylase complex);GO:0004407(histone deacetylase activity);GO:0003712(transcription cofactor activity);GO:0006355(regulation of transcription, DNA-templated);GO:0003677(DNA binding);GO:0008270(zinc ion binding);GO:0010314(phosphatidylinositol-5-phosphate binding);GO:0031491(nucleosome binding);GO:0042393(histone binding);GO:0044378(non-seque…	NA	NA	NA	SAP30 like [Source:HGNC Symbol;Acc:HGNC:25663]	14.625	12.1764	10.3351	5.7935	6.02475	8.43587	7.60379	6.33601	2.78234	6.18938	4.54818	4.8052	4.31018	4.74822	2.90451	3.54466	2.89165
18501	0	chr13	+	13146841	13150694	ENSGALT00000040533	8	1467	MSTRG.7975	CD74	GO:0042289(MHC class II protein binding);GO:0006886(intracellular protein transport);GO:0019882(antigen processing and presentation);GO:0006955(immune response);GO:0005622(intracellular);GO:0016021(integral component of membrane);GO:0016020(membrane);GO:0070206(protein trimerization);GO:0005783(endoplasmic reticulum);GO:0009986(cell surface);GO:0005737(cytoplasm);GO:0042288(MHC class I protein bi…	05168(Herpes simplex infection)	NA	NA	CD74 molecule [Source:HGNC Symbol;Acc:HGNC:1697]	15.2999	188.706	244.476	81.1583	34.044	510.445	26.7151	40.9527	43.274	2.55252	7.99072	7.29951	18.6836	16.8122	8.3648	4.15157	6.03731
18502	0	chr13	+	13146871	13150477	ENSGALT00000007311	9	1409	MSTRG.7975	CD74	GO:0042289(MHC class II protein binding);GO:0006886(intracellular protein transport);GO:0019882(antigen processing and presentation);GO:0006955(immune response);GO:0005622(intracellular);GO:0016021(integral component of membrane);GO:0016020(membrane);GO:0070206(protein trimerization);GO:0005783(endoplasmic reticulum);GO:0009986(cell surface);GO:0005737(cytoplasm);GO:0042288(MHC class I protein bi…	05168(Herpes simplex infection)	K06505	NA	CD74 molecule [Source:HGNC Symbol;Acc:HGNC:1697]	136.458	171.664	65.2722	36.3991	36.6819	450.445	13.2247	19.706	18.3272	3.84905	6.40696	3.18857	4.0586	5.31001	2.8777	9.17021	1.06133
18568	0	chr13	-	13463307	13467634	ENSGALT00000089964	8	1517	MSTRG.7992	SQSTM1	GO:0007032(endosome organization);GO:0019901(protein kinase binding);GO:0042802(identical protein binding);GO:0016605(PML body);GO:0016236(macroautophagy);GO:0000932(P-body);GO:0019899(enzyme binding);GO:0043130(ubiquitin binding);GO:0006914(autophagy);GO:0005737(cytoplasm);GO:0005776(autophagosome);GO:0031625(ubiquitin protein ligase binding);GO:0005829(cytosol);GO:0070062(extracellular exosome)…	04137(Mitophagy - animal);04217(Necroptosis);04218(Cellular senescence)	NA	NA	sequestosome 1 [Source:HGNC Symbol;Acc:HGNC:11280]	13.2237	22.6934	22.7995	13.2179	9.59194	7.7712	4.96824	8.81261	8.43549	17.9702	13.7929	15.9646	3.71587	2.49936	1.19002	0.812138	0.839177
18612	0	chr13	+	13577782	13594233	ENSGALT00000082236	14	2422	MSTRG.8000	HNRNPH1	NA	NA	NA	NA	heterogeneous nuclear ribonucleoprotein H [Source:RefSeq peptide;Acc:NP_989827]	6.61582	11.0345	10.8643	1.59697	12.4559	12.8255	0.489043	3.94539	5.32873	1.24555	0.734798	0.79154	0.833225	0.983671	0.863824	1.95082	1.03764
18613	0	chr13	+	13577785	13594230	ENSGALT00000084746	14	2416	MSTRG.8000	HNRNPH1	NA	NA	NA	NA	heterogeneous nuclear ribonucleoprotein H [Source:RefSeq peptide;Acc:NP_989827]	6.83442	11.0861	10.8896	1.47789	12.4212	12.795	0.48504	3.95466	5.32308	1.24835	0.736624	0.793506	0.834957	0.985917	0.865949	1.95493	1.0401
18774	0	chr13	-	15280051	15293224	ENSGALT00000010230	7	3417	MSTRG.8050	ENSGALG00000006327	NA	NA	NA	NA	NA	5.36222	3.79118	2.50012	2.8885	2.75452	3.7033	2.54748	2.30611	2.30164	1.677	2.46333	2.15561	1.31144	1.66381	0.980542	1.06585	1.04062
18785	0	chr13	+	15502505	15547741	ENSGALT00000081254	9	1732	MSTRG.8056	H2AFY	GO:0070062(extracellular exosome);GO:0035098(ESC/E(Z) complex);GO:0005730(nucleolus);GO:0005721(pericentric heterochromatin);GO:0005634(nucleus);GO:0000793(condensed chromosome);GO:0000790(nuclear chromatin);GO:0000784(nuclear chromosome, telomeric region);GO:0000228(nuclear chromosome);GO:1904815(negative regulation of protein localization to chromosome, telomeric region);GO:1902882(regulation o…	04217(Necroptosis)	NA	NA	Core histone macro-H2A.1 [Source:UniProtKB/Swiss-Prot;Acc:O93327]	4.87376	9.84373	4.37246	10.0471	7.93609	5.42459	7.51879	5.05601	6.30427	3.54723	3.38045	1.60999	0.694937	2.82652	0.808979	1.4532	0.53828
18823	0	chr13	+	15826332	15838193	ENSGALT00000046363	7	1303	MSTRG.8069	SAR1B	NA	04141(Protein processing in endoplasmic reticulum)	NA	NA	secretion associated Ras related GTPase 1B [Source:HGNC Symbol;Acc:HGNC:10535]	17.0189	29.9263	10.256	21.6068	25.2075	6.2878	22.1189	26.6039	19.1625	10.7481	0.347357	0.145369	1.68431	0.30379	0.782245	0.591204	0.499649
18933	0	chr13	-	16977371	16983282	ENSGALT00000002244	10	1896	MSTRG.8107	IRF1	GO:0005737(cytoplasm);GO:0005634(nucleus);GO:0000790(nuclear chromatin);GO:2000564(regulation of CD8-positive, alpha-beta T cell proliferation);GO:0071260(cellular response to mechanical stimulus);GO:0060333(interferon-gamma-mediated signaling pathway);GO:0051607(defense response to virus);GO:0045944(positive regulation of transcription from RNA polymerase II promoter);GO:0045893(positive regulat…	NA	NA	NA	Interferon regulatory factor 1 [Source:UniProtKB/Swiss-Prot;Acc:Q90876]	2.25829	8.65513	2.69488	3.57728	2.90842	16.5568	2.70534	2.63954	1.29897	0.913109	0.934477	1.30097	0	0.06257	0	0	0.492071
19253	0	chr14	+	926664	933480	ENSGALT00000005095	5	740	MSTRG.8253	LITAF	GO:0043231(intracellular membrane-bounded organelle);GO:0005886(plasma membrane);GO:0005829(cytosol);GO:0005794(Golgi apparatus);GO:0005765(lysosomal membrane);GO:0005654(nucleoplasm);GO:0071222(cellular response to lipopolysaccharide);GO:0043123(positive regulation of I-kappaB kinase/NF-kappaB signaling);GO:0042347(negative regulation of NF-kappaB import into nucleus);GO:0032496(response to lipo…	04142(Lysosome)	K19363	NA	lipopolysaccharide induced TNF factor [Source:HGNC Symbol;Acc:HGNC:16841]	3.82464	1.96801	2.32893	1.7101	0.481817	12.2496	0.27666	0.143493	0.600928	1.00955	0.256295	0.493439	0.387326	0.450952	0.354387	0.052917	0.626577
19518	0	chr14	-	4047604	4058713	ENSGALT00000007215	7	2705	MSTRG.8359	MMD2	GO:0048471(perinuclear region of cytoplasm);GO:0046579(positive regulation of Ras protein signal transduction);GO:0045860(positive regulation of protein kinase activity);GO:0045666(positive regulation of neuron differentiation);GO:0019835(cytolysis);GO:0032880(regulation of protein localization);GO:0006468(protein phosphorylation);GO:0004672(protein kinase activity);GO:0016021(integral component …	NA	NA	NA	monocyte to macrophage differentiation associated 2 [Source:HGNC Symbol;Acc:HGNC:30133]	20.7892	9.08643	9.22537	3.45741	3.11453	7.80391	7.66557	7.00882	5.997	6.73415	15.484	3.76382	1.83379	2.53359	3.05087	0.658301	2.08706
19655	0	chr14	-	4757462	4767332	ENSGALT00000074829	12	2306	MSTRG.8397	ENSGALG00000004816	GO:2001170(negative regulation of ATP biosynthetic process);GO:2000973(regulation of pro-B cell differentiation);GO:2000506(negative regulation of energy homeostasis);GO:1901723(negative regulation of cell proliferation involved in kidney development);GO:1900181(negative regulation of protein localization to nucleus);GO:0070373(negative regulation of ERK1 and ERK2 cascade);GO:0051898(negative reg…	04150(mTOR signaling pathway)	K09594	NA	NA	3.48987	13.0483	2.27244	7.57192	7.0425	11.064	5.59152	10.2414	8.08656	6.82639	2.1266	3.91086	2.07821	3.94813	2.87179	2.61478	2.44073
19671	0	chr14	-	4818942	4856344	ENSGALT00000007783	8	2214	MSTRG.8395	PEMT	GO:0006656(phosphatidylcholine biosynthetic process);GO:0005789(endoplasmic reticulum membrane);GO:0005739(mitochondrion);GO:1903955(positive regulation of protein targeting to mitochondrion);GO:0006686(sphingomyelin biosynthetic process);GO:0008757(S-adenosylmethionine-dependent methyltransferase activity);GO:0004608(phosphatidylethanolamine N-methyltransferase activity);GO:0008170(N-methyltrans…	00564(Glycerophospholipid metabolism)	K00551	EC:2.1.1.17	phosphatidylethanolamine N-methyltransferase [Source:HGNC Symbol;Acc:HGNC:8830]	6.32473	7.01982	6.72326	5.49092	7.18877	5.81037	5.34648	7.2707	7.53695	4.4366	3.1428	2.92686	1.97564	2.4243	3.91048	2.19281	4.00051
19704	0	chr14	+	5064870	5082428	ENSGALT00000007980	5	5651	MSTRG.8409	ALKBH5	GO:0016607(nuclear speck);GO:0005829(cytosol);GO:0005794(Golgi apparatus);GO:0005654(nucleoplasm);GO:0005634(nucleus);GO:0035553(oxidative single-stranded RNA demethylation);GO:0007283(spermatogenesis);GO:0006406(mRNA export from nucleus);GO:0006397(mRNA processing);GO:0001666(response to hypoxia);GO:0035515(oxidative RNA demethylase activity);GO:0016706(oxidoreductase activity, acting on paired …	NA	NA	NA	alkB homolog 5, RNA demethylase [Source:HGNC Symbol;Acc:HGNC:25996]	89.0719	97.9162	72.0066	68.5681	102.579	68.4005	39.241	59.3106	68.5707	22.3173	15.3406	10.5697	2.92728	5.81048	0	7.53089	7.51876
19711	0	chr14	-	5095977	5104206	ENSGALT00000040662	30	3925	MSTRG.8411	FLII	GO:0005903(brush border);GO:0005829(cytosol);GO:0005815(microtubule organizing center);GO:0005654(nucleoplasm);GO:0051014(actin filament severing);GO:0007275(multicellular organism development);GO:0003779(actin binding);GO:0030036(actin cytoskeleton organization);GO:0051015(actin filament binding)	NA	NA	NA	FLII, actin remodeling protein [Source:HGNC Symbol;Acc:HGNC:3750]	46.4337	43.6731	65.8276	32.8043	34.275	47.3603	25.215	23.4816	44.0461	35.9966	42.0219	35.6312	15.3326	14.3624	19.8175	14.388	19.8622
19745	0	chr14	+	5208548	5245591	ENSGALT00000050442	9	2107	MSTRG.8422	EPN2	GO:0045296(cadherin binding);GO:0043231(intracellular membrane-bounded organelle)	04144(Endocytosis)	K12471	NA	epsin 2 [Source:HGNC Symbol;Acc:HGNC:18639]	14.3674	14.6439	12.9256	11.1038	14.4024	13.0694	11.6042	11.6519	10.1639	8.07746	11.653	11.2849	6.10614	6.35547	5.37447	7.18535	10.0046
19818	0	chr14	-	6168925	6175468	ENSGALT00000057236	9	1368	MSTRG.8447	RPL3L	GO:0022625(cytosolic large ribosomal subunit);GO:0000027(ribosomal large subunit assembly);GO:0003735(structural constituent of ribosome);GO:0030529(intracellular ribonucleoprotein complex);GO:0005840(ribosome);GO:0003723(RNA binding);GO:0006412(translation);GO:0005622(intracellular);GO:0016020(membrane)	03010(Ribosome)	K02925	NA	ribosomal protein L3 like [Source:HGNC Symbol;Acc:HGNC:10351]	2.49631	10.5265	3.80035	14.758	14.998	17.9729	14.946	27.0976	18.0963	0.191386	0.714913	0	0.118811	0.071902	0	0.034058	0.134849
19891	0	chr14	-	6532141	6535438	ENSGALT00000009467	2	2917	MSTRG.8465	PGP	GO:0045721(negative regulation of gluconeogenesis);GO:0035335(peptidyl-tyrosine dephosphorylation);GO:0016311(dephosphorylation);GO:0006650(glycerophospholipid metabolic process);GO:0006114(glycerol biosynthetic process);GO:0098519(nucleotide phosphatase activity, acting on free nucleotides);GO:0043136(glycerol-3-phosphatase activity);GO:0008967(phosphoglycolate phosphatase activity);GO:0004725(p…	01200(Carbon metabolism);00630(Glyoxylate and dicarboxylate metabolism)	K19269	EC:3.1.3.18;EC:3.1.3.48	phosphoglycolate phosphatase [Source:HGNC Symbol;Acc:HGNC:8909]	0.514835	24.5269	4.66943	11.9943	37.7602	0.655847	30.2103	37.5805	59.5858	3.83243	0	0.243478	0.17118	1.03788	0.242438	0.394875	0.119495
20078	0	chr14	-	7570435	7591157	ENSGALT00000058382	26	5287	MSTRG.8515	MARF1	GO:0048477(oogenesis);GO:0005777(peroxisome);GO:0016020(membrane);GO:0010923(negative regulation of phosphatase activity);GO:0006302(double-strand break repair);GO:0007143(female meiotic nuclear division);GO:0010468(regulation of gene expression);GO:0005794(Golgi apparatus);GO:0043231(intracellular membrane-bounded organelle)	NA	NA	NA	meiosis regulator and mRNA stability factor 1 [Source:HGNC Symbol;Acc:HGNC:29562]	16.3806	16.3385	10.8296	11.1133	12.6128	0.079342	11.1565	12.8464	11.7607	5.92395	2.44032	0	5.16497	5.20284	8.43088	5.90473	0.190651
20665	0	chr14	-	13126748	13129142	ENSGALT00000004086	6	1329	MSTRG.8780	MSS51	GO:0035176(social behavior)	NA	NA	NA	MSS51 mitochondrial translational activator [Source:HGNC Symbol;Acc:HGNC:21000]	6.68493	8.34731	9.14237	28.9487	18.291	18.2113	5.52638	13.273	15.594	1.62279	2.95603	2.00411	1.79558	2.44446	0.063045	0.10853	0.267223
20685	0	chr14	+	13237589	13239497	ENSGALT00000034473	5	903	MSTRG.8788	FAM173A	NA	NA	NA	NA	family with sequence similarity 173 member A [Source:HGNC Symbol;Acc:HGNC:14152]	17.5138	14.5852	17.1175	12.6597	14.2324	8.71702	6.42457	12.1138	9.58794	4.85993	8.82365	7.17481	3.65782	4.05972	1.48587	0.762055	1.29621
20686	0	chr14	+	13237589	13239497	ENSGALT00000056480	4	798	MSTRG.8788	FAM173A	NA	NA	NA	NA	family with sequence similarity 173 member A [Source:HGNC Symbol;Acc:HGNC:14152]	4.29043	0	2.5202	1.1824	1.25304	0.931886	0.122356	1.27237	0.132734	0	0	0.128778	0.369517	0	0	0.247464	0
20971	0	chr15	+	92237	149297	ENSGALT00000068361	55	7597	MSTRG.8885	PI4KA	NA	00562(Inositol phosphate metabolism);04070(Phosphatidylinositol signaling system)	NA	NA	phosphatidylinositol 4-kinase alpha [Source:HGNC Symbol;Acc:HGNC:8983]	7.52792	9.92507	9.43097	2.79773	8.78242	10.3434	6.46606	4.46119	7.82829	11.6299	1.03775	8.97825	1.42148	1.03869	0.755858	1.26809	0.698523
21488	0	chr15	+	5248131	5253078	ENSGALT00000005860	8	1832	MSTRG.9025	ENSGALG00000003696	GO:0015074(DNA integration);GO:0003676(nucleic acid binding)	NA	NA	NA	NA	3.85922	5.19554	5.32061	3.66013	8.49556	1.59206	2.63692	4.75423	3.32413	4.43889	3.27959	2.57611	0.862168	0	1.31095	0.436376	0.916338
21709	0	chr15	+	6264123	6272573	ENSGALT00000007523	13	1819	MSTRG.9099	ENSGALG00000004725	GO:0005739(mitochondrion);GO:0004029(aldehyde dehydrogenase (NAD) activity);GO:0016491(oxidoreductase activity);GO:0055114(oxidation-reduction process);GO:0008152(metabolic process)	NA	NA	NA	NA	75.9018	83.9756	81.3556	75.3934	80.6529	56.1623	36.9655	37.3268	35.474	22.9841	21.5404	23.0003	15.9406	14.8081	22.4165	27.2813	26.5746
22104	0	chr15	-	8327963	8334874	ENSGALT00000010365	6	1917	MSTRG.9183	KLHL22	GO:0072686(mitotic spindle);GO:0031463(Cul3-RING ubiquitin ligase complex);GO:0005827(polar microtubule);GO:0005813(centrosome);GO:0005737(cytoplasm);GO:0051301(cell division);GO:0007094(mitotic spindle assembly checkpoint);GO:0006513(protein monoubiquitination);GO:0000070(mitotic sister chromatid segregation);GO:0004842(ubiquitin-protein transferase activity);GO:0016567(protein ubiquitination)	NA	NA	NA	kelch like family member 22 [Source:HGNC Symbol;Acc:HGNC:25888]	15.0257	14.114	9.60163	7.74914	14.0046	8.4151	4.7619	16.1609	9.39256	3.32873	0	2.02346	2.21208	0	0	0	1.83329
22380	0	chr15	-	9765688	9767739	ENSGALT00000011938	3	594	MSTRG.9331	HSPB8	GO:0005829(cytosol);GO:0005737(cytoplasm);GO:0005634(nucleus);GO:0005622(intracellular);GO:0042802(identical protein binding)	NA	NA	NA	heat shock protein family B (small) member 8 [Source:HGNC Symbol;Acc:HGNC:30171]	221.151	143.225	399.161	55.9325	35.4734	59.7583	32.8092	28.7102	23.4723	25.5559	60.9165	24.2575	37.2738	32.8912	16.4687	23.6847	17.5293
22481	0	chr15	-	10759904	10820380	ENSGALT00000012578	14	2403	MSTRG.9364	OSBP2	GO:0097440(apical dendrite);GO:0007286(spermatid development);GO:0015485(cholesterol binding);GO:0006869(lipid transport);GO:0006810(transport)	NA	NA	NA	oxysterol binding protein 2 [Source:HGNC Symbol;Acc:HGNC:8504]	3.39388	27.1794	26.2039	23.1912	19.2897	17.5677	18.6223	19.9995	20.7473	5.38152	4.64953	7.09335	2.92757	7.37801	4.26619	5.67742	4.53317
22718	0	chr16	+	73925	76147	ENSGALT00000080781	7	1433	MSTRG.9449	BFIV21	GO:0005886(plasma membrane);GO:0046872(metal ion binding);GO:0016021(integral component of membrane);GO:0016020(membrane)	04514(Cell adhesion molecules (CAMs));04144(Endocytosis);04145(Phagosome);04218(Cellular senescence);05168(Herpes simplex infection)	NA	NA	NA	7.52776	18.3961	9.18368	9.34652	5.63824	16.4298	2.67202	1.7832	0.787476	0	4.37732	0.697228	0	0.301993	0.565089	0	0.667317
22719	0	chr16	+	73925	76150	ENSGALT00000085671	7	1243	MSTRG.9449	BFIV21	GO:0005886(plasma membrane);GO:0046872(metal ion binding);GO:0016021(integral component of membrane);GO:0016020(membrane)	04514(Cell adhesion molecules (CAMs));04144(Endocytosis);04145(Phagosome);04218(Cellular senescence);05168(Herpes simplex infection)	NA	NA	NA	66.3801	107.886	85.9609	71.4457	66.5769	181.192	20.1214	32.7527	13.7609	4.81105	0	1.5392	2.67796	6.03535	0	0	0.372226
22735	0	chr16	-	87695	89889	ENSGALT00000066783	8	1244	MSTRG.9452	BF1	GO:0005886(plasma membrane);GO:0016021(integral component of membrane);GO:0016020(membrane)	04514(Cell adhesion molecules (CAMs));04144(Endocytosis);04145(Phagosome);04218(Cellular senescence);05168(Herpes simplex infection)	NA	NA	NA	30.4571	104.1	38.4656	28.2528	27.6898	83.2015	14.4849	29.2188	14.0059	0	1.79333	1.054	0.986006	0.636619	0.037939	0	0
22744	0	chr16	-	96322	99142	ENSGALT00000000214	4	915	MSTRG.9455	HLA-DMA	GO:0019882(antigen processing and presentation);GO:0042613(MHC class II protein complex);GO:0006955(immune response);GO:0016021(integral component of membrane);GO:0016020(membrane)	04514(Cell adhesion molecules (CAMs));04145(Phagosome);04672(Intestinal immune network for IgA production);05164(Influenza A);05168(Herpes simplex infection)	NA	NA	major histocompatibility complex, class II, DM alpha [Source:HGNC Symbol;Acc:HGNC:4934]	2.44527	2.74648	3.24078	1.89542	1.12863	9.80305	0.656964	1.31364	1.30276	0.119505	0.540279	0.297035	0.440312	0.185977	0.637268	0.32693	0.415842
22750	0	chr16	-	109677	111212	ENSGALT00000067879	6	976	MSTRG.9457	BLB2	GO:0019882(antigen processing and presentation);GO:0042613(MHC class II protein complex);GO:0006955(immune response);GO:0016021(integral component of membrane);GO:0016020(membrane)	04514(Cell adhesion molecules (CAMs));04145(Phagosome);04672(Intestinal immune network for IgA production);05164(Influenza A);05168(Herpes simplex infection)	NA	NA	NA	29.3857	48.9178	37.8018	24.124	12.606	75.9524	8.91746	15.85	15.1219	2.21976	3.89803	2.6936	1.78827	1.40876	1.5711	0.827147	0.352822
22753	0	chr16	+	112185	115717	ENSGALT00000000203	8	1378	MSTRG.9456	TAPBP	GO:0016021(integral component of membrane);GO:0016020(membrane)	NA	NA	NA	TAP binding protein [Source:HGNC Symbol;Acc:HGNC:11566]	8.0155	17.9383	9.17745	0.853854	0.041143	43.6986	0.062887	5.10029	5.06591	0.679547	3.85379	0.114425	0.147364	0.014443	0.070504	0	0.875365
22756	0	chr16	+	116646	118017	ENSGALT00000008925	6	801	MSTRG.9458	BLB1	GO:0019882(antigen processing and presentation);GO:0042613(MHC class II protein complex);GO:0006955(immune response);GO:0016021(integral component of membrane);GO:0016020(membrane)	04514(Cell adhesion molecules (CAMs));04145(Phagosome);04672(Intestinal immune network for IgA production);05164(Influenza A);05168(Herpes simplex infection)	K06752	NA	NA	37.341	36.9305	83.5802	25.6654	12.9583	126.815	13.074	6.34549	12.5279	1.29447	1.06137	0.904197	0.944142	1.4271	0.930291	0.719374	0.291119
23055	0	chr17	-	999390	1001420	ENSGALT00000053882	7	750	MSTRG.9568	ENSGALG00000030886	GO:0001516(prostaglandin biosynthetic process);GO:0004667(prostaglandin-D synthase activity);GO:0005576(extracellular region);GO:0005501(retinoid binding);GO:0045187(regulation of circadian sleep/wake cycle, sleep);GO:2000255(negative regulation of male germ cell proliferation)	00590(Arachidonic acid metabolism)	K01830	EC:5.3.99.2	NA	34.482	117.952	64.1221	21.9807	16.4842	654.933	19.6047	47.0118	82.2798	19.5936	35.3495	57.5269	10.5784	6.47006	1.39825	2.20902	1.17636
23388	0	chr17	+	5415468	5418841	ENSGALT00000043760	6	801	MSTRG.9690	AK1	GO:0036126(sperm flagellum);GO:0005886(plasma membrane);GO:0005829(cytosol);GO:0005737(cytoplasm);GO:0009142(nucleoside triphosphate biosynthetic process);GO:0007050(cell cycle arrest);GO:0006165(nucleoside diphosphate phosphorylation);GO:0004017(adenylate kinase activity);GO:0019205(nucleobase-containing compound kinase activity);GO:0046034(ATP metabolic process);GO:0004550(nucleoside diphosphat…	00230(Purine metabolism);00730(Thiamine metabolism)	K00939	EC:2.7.4.3	adenylate kinase 1 [Source:HGNC Symbol;Acc:HGNC:361]	64.893	251.828	692.665	587.791	684.601	391.297	563.248	363.479	887.522	99.2594	89.9573	139.905	64.6772	18.6163	2.80554	7.65531	10.1634
23883	0	chr17	+	7753256	7827661	ENSGALT00000059924	10	1919	MSTRG.9826	RXRA	GO:0090575(RNA polymerase II transcription factor complex);GO:0008134(transcription factor binding);GO:0046982(protein heterodimerization activity);GO:0005634(nucleus);GO:0019899(enzyme binding);GO:0043565(sequence-specific DNA binding);GO:0006357(regulation of transcription from RNA polymerase II promoter);GO:0043234(protein complex);GO:0003677(DNA binding);GO:0045944(positive regulation of tran…	NA	NA	NA	retinoid X receptor alpha [Source:HGNC Symbol;Acc:HGNC:10477]	2.25	1.29432	0.691813	2.75123	2.64177	3.9285	0.582186	1.44887	0.759485	0.111686	3.58573	0.001336	0.000151	0.423785	0.015864	0.339545	0
24003	0	chr17	+	8639601	8655949	ENSGALT00000076281	10	2019	MSTRG.9858	UBAC1	GO:0005829(cytosol);GO:0005886(plasma membrane);GO:0070062(extracellular exosome);GO:0005794(Golgi apparatus)	NA	NA	NA	UBA domain containing 1 [Source:HGNC Symbol;Acc:HGNC:30221]	24.3859	49.8575	17.6196	49.7603	53.4289	37.4272	38.7613	43.6056	41.9012	13.135	14.1741	14.3355	7.12066	7.65889	8.52407	9.97315	4.00158
24054	0	chr17	+	8895317	8908319	ENSGALT00000002199	17	2694	MSTRG.9874	GSN	GO:0002102(podosome);GO:0014891(striated muscle atrophy);GO:0016528(sarcoplasm);GO:0005925(focal adhesion);GO:0005509(calcium ion binding);GO:0060271(cilium assembly);GO:0010628(positive regulation of gene expression);GO:0030041(actin filament polymerization);GO:0005615(extracellular space);GO:0051693(actin filament capping);GO:0003779(actin binding);GO:0005829(cytosol);GO:0005737(cytoplasm);GO:0…	04810(Regulation of actin cytoskeleton)	NA	NA	gelsolin [Source:HGNC Symbol;Acc:HGNC:4620]	138.235	158.816	189.45	189.699	108.136	164.454	104.1	116.856	129.984	64.8095	78.8967	80.5864	53.6753	61.4878	38.6448	39.1758	36.9526
24446	0	chr18	-	482921	501266	ENSGALT00000070110	40	6015	MSTRG.10456	ENSGALG00000037864	NA	04530(Tight junction)	NA	NA	NA	112.463	32.4184	306.803	198.308	35.3473	41.4076	114.631	144.425	184.166	42.2586	73.5324	47.4154	34.0926	73.7572	15.7732	29.2964	21.8792
24531	0	chr18	-	832279	865063	ENSGALT00000001507	12	2867	MSTRG.9970	MYOCD	GO:0005634(nucleus);GO:0000790(nuclear chromatin);GO:2001015(negative regulation of skeletal muscle cell differentiation);GO:2000727(positive regulation of cardiac muscle cell differentiation);GO:2000721(positive regulation of transcription from RNA polymerase II promoter involved in smooth muscle cell differentiation);GO:2000587(negative regulation of platelet-derived growth factor receptor-beta…	NA	NA	NA	myocardin [Source:HGNC Symbol;Acc:HGNC:16067]	11.8993	1.35824	2.33961	6.70621	8.04202	5.39082	2.2102	0	4.78969	0	0.139331	1.62034	0	1.05839	0.157829	0.628566	0
24793	0	chr18	+	4287924	4299050	ENSGALT00000002784	7	4905	MSTRG.10086	JMJD6	GO:0030529(intracellular ribonucleoprotein complex);GO:0005886(plasma membrane);GO:0005829(cytosol);GO:0005730(nucleolus);GO:0005654(nucleoplasm);GO:0005634(nucleus);GO:0070079(histone H4-R3 demethylation);GO:0070078(histone H3-R2 demethylation);GO:0060041(retina development in camera-type eye);GO:0048821(erythrocyte development);GO:0048024(regulation of mRNA splicing, via spliceosome);GO:0043654…	NA	NA	NA	arginine demethylase and lysine hydroxylase [Source:HGNC Symbol;Acc:HGNC:19355]	48.1479	55.7749	47.2763	19.5606	32.502	52.0157	6.96271	3.67119	9.9513	7.42582	6.12269	4.65858	1.89961	2.24585	3.84837	3.78822	2.09964
25247	0	chr18	-	7391528	7502336	ENSGALT00000045861	18	2049	MSTRG.10231	PRKCA	GO:0070459(prolactin secretion);GO:0005886(plasma membrane);GO:0004697(protein kinase C activity);GO:0004674(protein serine/threonine kinase activity);GO:0005622(intracellular);GO:0035556(intracellular signal transduction);GO:0018105(peptidyl-serine phosphorylation);GO:0010467(gene expression);GO:0046872(metal ion binding);GO:0008270(zinc ion binding);GO:0006468(protein phosphorylation);GO:001674…	04010(MAPK signaling pathway);04012(ErbB signaling pathway);04310(Wnt signaling pathway);04370(VEGF signaling pathway);04020(Calcium signaling pathway);04070(Phosphatidylinositol signaling system);04150(mTOR signaling pathway);04510(Focal adhesion);04540(Gap junction);04912(GnRH signaling pathway);04916(Melanogenesis);04261(Adrenergic signaling in cardiomyocytes);04270(Vascular smooth muscle cont…	K02677	EC:2.7.11.13	protein kinase C alpha [Source:HGNC Symbol;Acc:HGNC:9393]	15.8066	17.1204	10.5326	12.0341	17.6747	12.7377	12.5204	5.49287	6.8487	8.45113	7.56464	3.75339	6.56716	5.62988	2.34491	3.0994	4.08673
25288	0	chr18	+	7826567	7849764	ENSGALT00000062757	4	1134	MSTRG.10257	GNA13	NA	04371(Apelin signaling pathway);04810(Regulation of actin cytoskeleton);04270(Vascular smooth muscle contraction)	K04639	NA	G protein subunit alpha 13 [Source:HGNC Symbol;Acc:HGNC:4381]	5.74145	5.12005	6.82328	2.59464	2.63014	5.62611	1.17765	2.24043	1.88075	2.31308	2.31635	2.92758	0.036503	0.288149	0.900534	0.220359	2.16011
25300	0	chr18	-	7900384	7918509	ENSGALT00000006701	13	1443	MSTRG.10261	WIPI1	GO:0032266(phosphatidylinositol-3-phosphate binding);GO:0080025(phosphatidylinositol-3,5-bisphosphate binding);GO:0034045(pre-autophagosomal structure membrane);GO:0034497(protein localization to pre-autophagosomal structure);GO:0044804(autophagy of nucleus);GO:0000422(autophagy of mitochondrion);GO:0005829(cytosol);GO:0006914(autophagy);GO:0019898(extrinsic component of membrane);GO:0006497(prot…	04140(Autophagy - animal);04136(Autophagy - other eukaryotes)	NA	NA	WD repeat domain, phosphoinositide interacting 1 [Source:HGNC Symbol;Acc:HGNC:25471]	42.2992	34.9016	35.9113	37.3515	40.2218	36.4158	33.6606	40.2824	48.8944	9.11807	9.15815	11.5954	8.57307	7.9152	10.5115	10.9826	12.1774
25624	0	chr18	-	10006827	10008386	ENSGALT00000064853	3	462	MSTRG.10366	PPP1R27	NA	NA	NA	NA	protein phosphatase 1 regulatory subunit 27 [Source:HGNC Symbol;Acc:HGNC:16813]	265.546	154.004	559.609	39.9856	20.5577	13.0749	25.4986	51.4511	21.0843	22.8906	20.6174	22.9913	9.3444	8.47128	0.410511	0.05755	0.26527
25671	0	chr18	+	10076394	10134958	ENSGALT00000071692	29	7643	MSTRG.10376	SPAG9	GO:0030335(positive regulation of cell migration);GO:0005737(cytoplasm);GO:0005829(cytosol);GO:0070062(extracellular exosome);GO:0008432(JUN kinase binding);GO:0019894(kinesin binding);GO:0048273(mitogen-activated protein kinase p38 binding);GO:0000187(activation of MAPK activity);GO:0007257(activation of JUN kinase activity);GO:0042147(retrograde transport, endosome to Golgi);GO:0043410(positive…	NA	NA	NA	sperm associated antigen 9 [Source:HGNC Symbol;Acc:HGNC:14524]	9.71475	9.21155	4.78113	6.20174	4.97714	6.11986	8.14164	12.6795	6.09383	4.00466	6.49534	4.36341	1.92181	2.49268	2.5467	2.61674	1.96932
26203	0	chr19	+	3181799	3232934	ENSGALT00000002350	55	8922	MSTRG.10583	ZZEF1	GO:0046872(metal ion binding);GO:0008270(zinc ion binding);GO:0005509(calcium ion binding)	NA	NA	NA	zinc finger ZZ-type and EF-hand domain containing 1 [Source:HGNC Symbol;Acc:HGNC:29027]	30.4675	17.7295	17.229	17.7897	21.4963	17.1334	5.80229	10.575	7.34437	5.41075	9.07893	2.7275	3.34125	1.04645	4.66372	2.76452	2.95139
26480	0	chr19	-	4883137	4888075	ENSGALT00000003916	10	1334	MSTRG.10700	PHKG1	GO:0005964(phosphorylase kinase complex);GO:0004689(phosphorylase kinase activity);GO:0005977(glycogen metabolic process);GO:0005978(glycogen biosynthetic process);GO:0005516(calmodulin binding);GO:0035556(intracellular signal transduction);GO:0018107(peptidyl-threonine phosphorylation);GO:0018105(peptidyl-serine phosphorylation);GO:0006468(protein phosphorylation);GO:0005524(ATP binding);GO:0004…	04020(Calcium signaling pathway);04910(Insulin signaling pathway)	NA	NA	phosphorylase kinase catalytic subunit gamma 1 [Source:HGNC Symbol;Acc:HGNC:8930]	206.859	299.835	319.183	178.074	636.314	238.797	475.853	501.307	751.713	96.3385	98.8493	95.5257	16.7877	16.4154	13.2626	15.5555	11.2967
26789	0	chr19	-	6062311	6069878	ENSGALT00000039622	20	2424	MSTRG.10797	GIT1	GO:0032587(ruffle membrane);GO:0005096(GTPase activator activity);GO:0005737(cytoplasm);GO:0043547(positive regulation of GTPase activity);GO:0046872(metal ion binding);GO:0034613(cellular protein localization);GO:0032465(regulation of cytokinesis);GO:0016020(membrane);GO:0005829(cytosol);GO:0032403(protein complex binding);GO:0005925(focal adhesion);GO:0048013(ephrin receptor signaling pathway)	04144(Endocytosis);04810(Regulation of actin cytoskeleton)	NA	NA	GIT ArfGAP 1 [Source:HGNC Symbol;Acc:HGNC:4272]	3.97702	5.21892	8.04782	4.79116	3.43962	5.56653	2.35045	2.73186	4.88154	1.5661	0.289523	1.30667	1.31365	0.330485	0.521689	1.15203	1.16617
26792	0	chr19	-	6062497	6070062	ENSGALT00000068993	21	2476	MSTRG.10797	GIT1	GO:0032587(ruffle membrane);GO:0005096(GTPase activator activity);GO:0005737(cytoplasm);GO:0043547(positive regulation of GTPase activity);GO:0046872(metal ion binding);GO:0034613(cellular protein localization);GO:0032465(regulation of cytokinesis);GO:0016020(membrane);GO:0005829(cytosol);GO:0032403(protein complex binding);GO:0005925(focal adhesion);GO:0048013(ephrin receptor signaling pathway)	04144(Endocytosis);04810(Regulation of actin cytoskeleton)	NA	NA	GIT ArfGAP 1 [Source:HGNC Symbol;Acc:HGNC:4272]	10.7191	14.178	16.5623	8.76526	8.75984	7.72051	2.99136	6.39301	8.26474	5.10183	4.03118	4.09513	1.93252	3.52715	3.96142	4.84139	4.06513
26798	0	chr19	-	6079158	6083665	ENSGALT00000051205	11	1476	MSTRG.10799	CORO6	GO:0030036(actin cytoskeleton organization);GO:0015629(actin cytoskeleton);GO:0051015(actin filament binding)	NA	NA	NA	coronin 6 [Source:HGNC Symbol;Acc:HGNC:21356]	31.7741	36.6782	54.3062	44.4891	47.935	36.3384	19.1896	47.3303	43.6002	6.61376	14.4713	17.3228	5.05416	4.26629	2.05866	1.41196	1.45001
26908	0	chr19	+	6626797	6639651	ENSGALT00000007345	12	4303	MSTRG.10841	ENSGALG00000004613	GO:0098655(cation transmembrane transport);GO:0033198(response to ATP);GO:0035590(purinergic nucleotide receptor signaling pathway);GO:0004931(extracellular ATP-gated cation channel activity);GO:0001614(purinergic nucleotide receptor activity);GO:0005639(integral component of nuclear inner membrane);GO:0060079(excitatory postsynaptic potential);GO:0006811(ion transport);GO:0005216(ion channel act…	04020(Calcium signaling pathway);04080(Neuroactive ligand-receptor interaction)	K05219	NA	NA	7.94984	5.50941	7.47444	1.49257	0.986026	2.8066	3.0717	3.38344	2.05925	3.6594	0.385165	1.60362	1.26528	1.77597	0.277269	0.497313	1.15741
26992	0	chr19	+	7163175	7171399	ENSGALT00000008115	6	1854	MSTRG.10856	PPM1E	GO:0043234(protein complex);GO:0005730(nucleolus);GO:0005634(nucleus);GO:0051496(positive regulation of stress fiber assembly);GO:0035970(peptidyl-threonine dephosphorylation);GO:0035690(cellular response to drug);GO:0006470(protein dephosphorylation);GO:0006469(negative regulation of protein kinase activity);GO:0004722(protein serine/threonine phosphatase activity);GO:0043169(cation binding);GO:…	NA	NA	NA	protein phosphatase, Mg2+/Mn2+ dependent 1E [Source:HGNC Symbol;Acc:HGNC:19322]	3.40973	8.34684	5.86721	4.15718	4.88284	5.76876	9.08499	6.67255	8.79337	0.031875	2.07789	0.510647	0.369791	0.956562	1.73987	0.500714	1.38919
27089	0	chr19	-	7765279	7972906	ENSGALT00000049198	24	2879	MSTRG.10885	BCAS3	GO:0048487(beta-tubulin binding);GO:2000114(regulation of establishment of cell polarity);GO:0008134(transcription factor binding);GO:0043547(positive regulation of GTPase activity);GO:0010595(positive regulation of endothelial cell migration);GO:0007030(Golgi organization);GO:0003682(chromatin binding);GO:0042393(histone binding);GO:0045944(positive regulation of transcription from RNA polymeras…	NA	NA	NA	BCAS3, microtubule associated cell migration factor [Source:HGNC Symbol;Acc:HGNC:14347]	15.5617	12.8736	12.015	5.14337	5.97192	4.09146	4.66314	8.83251	8.53006	5.31165	11.1539	0.601891	1.06042	0.365607	0.28807	0	0.216059
27099	0	chr19	+	8043990	8102086	ENSGALT00000080001	34	4845	MSTRG.10888	ENSGALG00000005350	GO:0036459(thiol-dependent ubiquitinyl hydrolase activity);GO:0016579(protein deubiquitination);GO:0006511(ubiquitin-dependent protein catabolic process);GO:0004843(thiol-dependent ubiquitin-specific protease activity);GO:0005509(calcium ion binding)	NA	NA	NA	NA	27.1386	16.0351	13.2696	7.01614	13.9732	10.8338	12.3198	13.4058	9.6417	6.63315	1.68722	3.55885	0.624614	2.06733	1.51757	4.45522	2.35093
27410	0	chr19	-	9933642	9943984	ENSGALT00000086705	6	1250	MSTRG.10990	SMTNL2	NA	NA	NA	NA	smoothelin like 2 [Source:HGNC Symbol;Acc:HGNC:24764]	7.63081	25.5241	7.50976	0	18.2706	0.171217	0	2.9609	0.117559	0	1.93268	0.000975	3.75788	0.14032	0	0	0.167298
29175	0	chr2	+	23910398	23919004	ENSGALT00000015772	5	1308	MSTRG.11597	ENSGALG00000009691	GO:0000151(ubiquitin ligase complex);GO:0004842(ubiquitin-protein transferase activity);GO:0031625(ubiquitin protein ligase binding);GO:0016567(protein ubiquitination);GO:0005634(nucleus);GO:0005737(cytoplasm);GO:0035556(intracellular signal transduction)	NA	NA	NA	NA	19.4725	28.6138	14.1386	47.6002	52.9258	21.2416	60.0657	63.1752	50.7198	9.97172	7.58436	15.0673	0.161876	0.026233	0	0.106861	0
29448	0	chr2	-	29049262	29109429	ENSGALT00000037907	26	3135	MSTRG.11751	SNX13	GO:0005769(early endosome);GO:0043547(positive regulation of GTPase activity);GO:0006886(intracellular protein transport);GO:0035091(phosphatidylinositol binding);GO:0032266(phosphatidylinositol-3-phosphate binding);GO:0016021(integral component of membrane);GO:0016020(membrane)	NA	NA	NA	sorting nexin 13 [Source:HGNC Symbol;Acc:HGNC:21335]	10.3146	5.68317	5.4137	6.87249	4.4287	3.68892	4.26276	5.52557	4.4488	5.15614	3.74419	3.83756	2.39331	2.31017	1.23574	2.18821	1.29329
29659	0	chr2	+	32275230	32307274	ENSGALT00000063895	7	1635	MSTRG.11850	SNX10	GO:0031313(extrinsic component of endosome membrane);GO:0005813(centrosome);GO:0005783(endoplasmic reticulum);GO:0005634(nucleus);GO:0071539(protein localization to centrosome);GO:0061512(protein localization to cilium);GO:0060271(cilium assembly);GO:0030316(osteoclast differentiation);GO:0007032(endosome organization);GO:0051117(ATPase binding);GO:0005545(1-phosphatidylinositol binding);GO:00198…	NA	NA	NA	sorting nexin 10 [Source:HGNC Symbol;Acc:HGNC:14974]	2.30322	1.66315	2.3401	1.26557	0.740164	4.37155	1.01322	0.873429	0.868588	2.56509	2.62938	1.40675	0.466071	0.553454	0.29341	0.617792	0.025602
29920	0	chr2	+	35988108	36027652	ENSGALT00000018402	18	2514	MSTRG.11954	ENSGALG00000011278	GO:0016573(histone acetylation);GO:0004402(histone acetyltransferase activity);GO:0006355(regulation of transcription, DNA-templated);GO:0008080(N-acetyltransferase activity);GO:0005634(nucleus)	NA	NA	NA	NA	33.6272	27.4636	9.73341	28.1486	28.1669	18.2951	19.8093	21.0755	21.4549	16.5109	9.3997	10.8027	9.15215	5.11076	3.97381	5.2851	7.79008
30225	0	chr2	-	40990423	41020031	ENSGALT00000079363	7	3412	MSTRG.12096	ABHD5	GO:0005811(lipid droplet);GO:0005829(cytosol);GO:0042171(lysophosphatidic acid acyltransferase activity);GO:0006654(phosphatidic acid biosynthetic process);GO:0010891(negative regulation of sequestering of triglyceride);GO:0010898(positive regulation of triglyceride catabolic process);GO:0050996(positive regulation of lipid catabolic process);GO:0051006(positive regulation of lipoprotein lipase a…	NA	NA	NA	abhydrolase domain containing 5 [Source:HGNC Symbol;Acc:HGNC:21396]	15.3521	9.72097	9.67534	6.43824	4.6033	2.23448	9.82353	5.70675	6.49442	7.32698	4.98904	5.35773	0.259176	1.74311	0.172878	0.900609	0.950728
30284	0	chr2	+	41589410	41630872	ENSGALT00000070703	9	1469	MSTRG.12132	SH3BP5	GO:0006469(negative regulation of protein kinase activity);GO:0035556(intracellular signal transduction);GO:0004860(protein kinase inhibitor activity)	NA	NA	NA	SH3 domain binding protein 5 [Source:HGNC Symbol;Acc:HGNC:10827]	46.8324	46.942	50.1285	41.536	37.529	48.0212	20.4325	42.943	24.636	26.9847	30.6553	32.5579	14.2348	30.9257	12.9491	13.1873	16.7581
30512	0	chr2	-	44525194	44530446	ENSGALT00000054863	7	885	MSTRG.12217	SLC25A38	GO:0030218(erythrocyte differentiation)	NA	NA	NA	solute carrier family 25 member 38 [Source:HGNC Symbol;Acc:HGNC:26054]	4.49732	3.17991	2.99537	0.606603	1.93898	3.89941	0	0.653756	0.569335	1.80734	1.86062	0.288888	0.088797	0	0.024804	0	0.173368
30712	0	chr2	+	47182121	47201049	ENSGALT00000059857	7	2505	MSTRG.12288	HERPUD2	NA	NA	NA	NA	HERPUD family member 2 [Source:HGNC Symbol;Acc:HGNC:21915]	2.29851	1.76223	2.68548	1.4735	2.29108	1.72495	1.91642	1.00688	2.0154	1.24342	0.871282	0.976432	0.024112	0.220134	0.585665	0.178852	0.160704
30769	0	chr2	+	48223317	48236139	ENSGALT00000079946	4	2669	MSTRG.12319	KBTBD2	NA	NA	NA	NA	kelch repeat and BTB domain containing 2 [Source:HGNC Symbol;Acc:HGNC:21751]	3.36375	2.72747	3.40288	1.81354	2.16319	2.63562	1.88292	2.31655	1.84067	3.1342	1.74628	2.56347	0.974417	1.10361	2.09227	0.96355	1.56892
31325	0	chr2	-	56746642	56864116	ENSGALT00000060492	11	2673	MSTRG.12599	NFATC1	GO:0005634(nucleus);GO:0045944(positive regulation of transcription from RNA polymerase II promoter);GO:0005654(nucleoplasm);GO:0000790(nuclear chromatin);GO:0016604(nuclear body);GO:0045893(positive regulation of transcription, DNA-templated);GO:0035556(intracellular signal transduction);GO:0033173(calcineurin-NFAT signaling cascade)	04010(MAPK signaling pathway);04310(Wnt signaling pathway);04218(Cellular senescence);04933(AGE-RAGE signaling pathway in diabetic complications)	K04446	NA	nuclear factor of activated T-cells 1 [Source:HGNC Symbol;Acc:HGNC:7775]	7.99745	6.41086	4.53916	5.41141	5.38291	3.48396	0.850935	1.27109	1.30514	1.10056	2.69878	0.582187	0.923698	0	0.310971	0.213996	0
31326	0	chr2	-	56746642	56868269	ENSGALT00000053589	10	3248	MSTRG.12599	NFATC1	GO:0005634(nucleus);GO:0045944(positive regulation of transcription from RNA polymerase II promoter);GO:0005654(nucleoplasm);GO:0000790(nuclear chromatin);GO:0016604(nuclear body);GO:0045893(positive regulation of transcription, DNA-templated);GO:0035556(intracellular signal transduction);GO:0033173(calcineurin-NFAT signaling cascade)	04010(MAPK signaling pathway);04310(Wnt signaling pathway);04218(Cellular senescence);04933(AGE-RAGE signaling pathway in diabetic complications)	NA	NA	nuclear factor of activated T-cells 1 [Source:HGNC Symbol;Acc:HGNC:7775]	28.2458	16.6695	19.1616	16.5722	15.0314	9.01598	8.85079	13.0903	12.0123	18.0718	14.2536	11.5209	8.11639	5.43348	2.70804	4.0787	2.60288
31916	0	chr2	-	67789008	67797812	ENSGALT00000020947	8	909	MSTRG.12831	MYLK4	GO:0070062(extracellular exosome);GO:0004687(myosin light chain kinase activity);GO:0005622(intracellular);GO:0035556(intracellular signal transduction);GO:0018107(peptidyl-threonine phosphorylation);GO:0018105(peptidyl-serine phosphorylation);GO:0006468(protein phosphorylation);GO:0005524(ATP binding);GO:0004674(protein serine/threonine kinase activity);GO:0004672(protein kinase activity);GO:000…	NA	NA	NA	myosin light chain kinase family member 4 [Source:HGNC Symbol;Acc:HGNC:27972]	5.14119	17.3249	0.552567	6.65441	12.3815	3.56411	4.48104	7.19265	6.64074	0.217292	0	1.30651	1.29139	0.153013	0.00469	0.4225	0.3831
32146	0	chr2	-	78505719	78551206	ENSGALT00000061752	26	7677	MSTRG.12955	MARCH6	GO:0070936(protein K48-linked ubiquitination);GO:0004842(ubiquitin-protein transferase activity);GO:0019899(enzyme binding);GO:0016020(membrane);GO:0030176(integral component of endoplasmic reticulum membrane);GO:0005783(endoplasmic reticulum);GO:1990381(ubiquitin-specific protease binding);GO:0010498(proteasomal protein catabolic process);GO:0031624(ubiquitin conjugating enzyme binding);GO:00160…	04141(Protein processing in endoplasmic reticulum)	NA	NA	membrane associated ring-CH-type finger 6 [Source:HGNC Symbol;Acc:HGNC:30550]	5.81306	5.49328	6.77307	4.10711	3.11772	4.69079	3.79088	6.32222	6.35449	2.05916	3.91854	2.79763	0.574822	0.227656	0.696175	0.548022	0.843015
32369	0	chr2	-	84481094	84554323	ENSGALT00000021448	18	2634	MSTRG.13045	TMEM245	GO:0016021(integral component of membrane);GO:0016020(membrane)	NA	NA	NA	transmembrane protein 245 [Source:HGNC Symbol;Acc:HGNC:1363]	15.1485	14.1192	10.2895	11.9502	13.7634	9.14449	10.2547	11.1437	11.1615	3.93557	1.90482	2.711	1.26782	2.54665	1.34801	0.717779	1.95786
32581	0	chr2	+	90026993	90030445	ENSGALT00000022096	3	540	MSTRG.13166	ENSGALG00000013575	GO:0016021(integral component of membrane)	NA	NA	NA	NA	0.89742	0.623779	0.383451	3.53686	0.472541	6.52928	3.63538	1.73239	1.76973	0.081321	0.526091	0.226395	0.114133	0.024126	0	0.08628	0
33294	0	chr2	+	103330870	103346162	ENSGALT00000047727	20	2159	MSTRG.13473	C18orf8	GO:0031902(late endosome membrane);GO:0010506(regulation of autophagy);GO:0005765(lysosomal membrane)	NA	NA	NA	chromosome 18 open reading frame 8 [Source:HGNC Symbol;Acc:HGNC:24326]	3.89731	4.26613	4.64041	3.28432	2.08447	2.43794	1.24922	3.80233	4.5803	2.63862	0	2.10388	0.365297	0.410092	0.649465	0.68768	0.391655
33935	0	chr2	-	116787853	116850398	ENSGALT00000070804	9	2151	MSTRG.13740	SLCO5A1	NA	NA	NA	NA	solute carrier organic anion transporter family member 5A1 [Source:HGNC Symbol;Acc:HGNC:19046]	26.201	15.4183	18.8181	17.3345	14.8663	14.8155	9.11265	10.8664	10.7572	6.45861	3.54821	5.10679	1.90403	1.41605	4.55848	4.21987	6.37638
34059	0	chr2	-	118543324	118621765	ENSGALT00000049250	6	3260	MSTRG.13786	JPH1	GO:0005789(endoplasmic reticulum membrane);GO:0005783(endoplasmic reticulum);GO:0005886(plasma membrane);GO:0016529(sarcoplasmic reticulum);GO:0030018(Z disc);GO:0030314(junctional membrane complex);GO:0008307(structural constituent of muscle);GO:0007517(muscle organ development);GO:0014701(junctional sarcoplasmic reticulum membrane)	NA	NA	NA	junctophilin 1 [Source:HGNC Symbol;Acc:HGNC:14201]	38.6479	36.9086	17.2917	32.3732	29.8884	24.957	20.676	25.5127	24.5295	9.24404	9.76885	10.4729	5.28921	4.73156	3.04239	5.34286	1.59009
34275	0	chr2	+	123600227	123660288	ENSGALT00000061864	25	3848	MSTRG.13892	WWP1	GO:0070062(extracellular exosome);GO:0045892(negative regulation of transcription, DNA-templated);GO:0043161(proteasome-mediated ubiquitin-dependent protein catabolic process);GO:0016567(protein ubiquitination);GO:0061630(ubiquitin protein ligase activity);GO:0004842(ubiquitin-protein transferase activity);GO:0042787(protein ubiquitination involved in ubiquitin-dependent protein catabolic process…	04120(Ubiquitin mediated proteolysis);04144(Endocytosis)	NA	NA	WW domain containing E3 ubiquitin protein ligase 1 [Source:HGNC Symbol;Acc:HGNC:17004]	4.08019	3.33425	3.40493	9.57056	3.7064	9.3338	5.63404	1.7342	2.47477	1.09813	4.23322	1.07076	1.22717	0.948084	1.24688	0.861244	2.58224
34637	0	chr2	-	129686126	129700944	ENSGALT00000072743	9	1546	MSTRG.14033	RRM2B	GO:0005654(nucleoplasm);GO:0005829(cytosol);GO:0070062(extracellular exosome);GO:0001822(kidney development);GO:0006264(mitochondrial DNA replication);GO:0003014(renal system process);GO:0004748(ribonucleoside-diphosphate reductase activity, thioredoxin disulfide as acceptor);GO:0006281(DNA repair);GO:0006979(response to oxidative stress);GO:0009200(deoxyribonucleoside triphosphate metabolic proc…	00230(Purine metabolism);00240(Pyrimidine metabolism);00480(Glutathione metabolism);04115(p53 signaling pathway)	K10808	EC:1.17.4.1	ribonucleotide reductase regulatory TP53 inducible subunit M2B [Source:HGNC Symbol;Acc:HGNC:17296]	8.75951	7.89502	6.06207	7.94291	7.57471	4.31697	6.62324	7.0276	6.63952	2.27546	2.18226	2.48621	1.99931	1.86569	3.37938	2.93452	2.44822
34878	0	chr2	-	136408844	136425722	ENSGALT00000081930	5	1292	MSTRG.14116	TNFRSF11B	NA	04060(Cytokine-cytokine receptor interaction)	K05148	NA	TNF receptor superfamily member 11b [Source:HGNC Symbol;Acc:HGNC:11909]	4.31913	0.986566	1.17245	4.24717	3.82659	2.10082	1.49763	0.834091	0.853658	0.50428	0.430907	0.595445	0.694951	0.422531	0.282096	0.500623	0.109506
36347	0	chr20	+	8015422	8022370	ENSGALT00000050988	9	1282	MSTRG.14641	ADRM1	GO:0005886(plasma membrane);GO:0005829(cytosol);GO:0005654(nucleoplasm);GO:0000502(proteasome complex);GO:0043248(proteasome assembly);GO:0010950(positive regulation of endopeptidase activity);GO:0006368(transcription elongation from RNA polymerase II promoter);GO:0070628(proteasome binding);GO:0061133(endopeptidase activator activity);GO:0002020(protease binding);GO:0005737(cytoplasm);GO:0005634…	NA	NA	NA	adhesion regulating molecule 1 [Source:HGNC Symbol;Acc:HGNC:15759]	9.45109	18.7589	15.3783	14.2149	17.4312	13.1966	6.84063	8.91301	8.72118	1.70532	6.55824	1.47643	1.36902	0.847665	1.60503	3.27814	0.595389
36390	0	chr20	+	8466030	8468924	ENSGALT00000059156	2	1967	MSTRG.14654	ENSGALG00000032990	NA	NA	NA	NA	NA	0.498437	1.80282	0.340428	3.03133	1.7128	2.7068	0.735809	0.312131	1.44971	0.223645	1.36957	0.430207	0.195041	0.524974	0.409851	0.496992	0.321914
36899	0	chr20	-	11263734	11275509	ENSGALT00000012184	12	2336	MSTRG.14852	NPEPL1	GO:0005634(nucleus);GO:0019538(protein metabolic process);GO:0008235(metalloexopeptidase activity);GO:0004177(aminopeptidase activity);GO:0030145(manganese ion binding);GO:0006508(proteolysis);GO:0005622(intracellular);GO:0005737(cytoplasm)	NA	NA	NA	aminopeptidase like 1 [Source:HGNC Symbol;Acc:HGNC:16244]	32.3486	47.6017	35.2117	38.8451	32.3976	26.1198	16.4963	24.1715	24.5539	7.58735	14.9568	9.72353	5.62169	5.89991	12.4496	14.8734	11.881
37216	0	chr21	+	192733	193379	ENSGALT00000090039	3	514	MSTRG.14993	SDHB	GO:0005654(nucleoplasm);GO:0005886(plasma membrane);GO:0070062(extracellular exosome);GO:0005739(mitochondrion);GO:0005743(mitochondrial inner membrane);GO:0005749(mitochondrial respiratory chain complex II, succinate dehydrogenase complex (ubiquinone));GO:0045273(respiratory chain complex II);GO:0005763(mitochondrial small ribosomal subunit);GO:0032543(mitochondrial translation);GO:0003735(struc…	01200(Carbon metabolism);00020(Citrate cycle (TCA cycle));00190(Oxidative phosphorylation);03010(Ribosome)	K00235;K02959	EC:1.3.5.1	succinate dehydrogenase complex iron sulfur subunit B [Source:HGNC Symbol;Acc:HGNC:10681]	2.92147	2.36708	2.18136	2.60335	5.448	1.13291	2.65416	1.45119	2.49025	2.21636	1.15507	2.88536	0.250779	0.867134	0.428468	1.04031	0.794941
37230	0	chr21	-	245686	252390	ENSGALT00000083827	7	916	MSTRG.14998	DJ-1	GO:0070062(extracellular exosome);GO:0048471(perinuclear region of cytoplasm);GO:0044297(cell body);GO:0043005(neuron projection);GO:0016605(PML body);GO:0005913(cell-cell adherens junction);GO:0005829(cytosol);GO:0005783(endoplasmic reticulum);GO:0005759(mitochondrial matrix);GO:0005758(mitochondrial intermembrane space);GO:0005739(mitochondrion);GO:0005747(mitochondrial respiratory chain comple…	NA	NA	NA	Parkinsonism associated deglycase [Source:HGNC Symbol;Acc:HGNC:16369]	28.3895	56.8424	65.9327	55.5108	42.2357	21.011	38.4673	37.6946	40.308	8.3759	7.1134	4.88339	5.82589	6.16765	11.1224	8.6545	8.93221
37477	0	chr21	-	2039964	2073019	ENSGALT00000002235	20	3930	MSTRG.15097	MIB2	GO:0005769(early endosome);GO:0000151(ubiquitin ligase complex);GO:0043123(positive regulation of I-kappaB kinase/NF-kappaB signaling);GO:0016567(protein ubiquitination);GO:0061630(ubiquitin protein ligase activity);GO:0004871(signal transducer activity);GO:0007165(signal transduction);GO:0046872(metal ion binding);GO:0008270(zinc ion binding);GO:0004842(ubiquitin-protein transferase activity)	NA	NA	NA	mindbomb E3 ubiquitin protein ligase 2 [Source:HGNC Symbol;Acc:HGNC:30577]	10.0901	7.81175	6.92916	4.92253	7.09399	8.21667	4.96159	5.25266	4.52597	3.66966	4.06378	3.10922	2.3723	0.377796	1.13557	0.59664	1.23951
37567	0	chr21	+	2554361	2560669	ENSGALT00000002917	6	3058	MSTRG.15115	ENSGALG00000001882	GO:0005031(tumor necrosis factor-activated receptor activity);GO:0097190(apoptotic signaling pathway);GO:0033209(tumor necrosis factor-mediated signaling pathway);GO:0032496(response to lipopolysaccharide);GO:0043066(negative regulation of apoptotic process);GO:0006955(immune response);GO:0042981(regulation of apoptotic process);GO:0007275(multicellular organism development);GO:0042127(regulation…	04060(Cytokine-cytokine receptor interaction)	K05154	NA	NA	1.50468	1.21886	0.666658	0.352537	0.108485	1.65153	0.07704	0.131796	0.16588	0.23247	0.36304	0.111058	0.018545	0.058526	0.001897	0	0.027948
37868	0	chr21	+	4371057	4383502	ENSGALT00000005925	4	2953	MSTRG.15200	SZRD1	NA	NA	NA	NA	SUZ RNA binding domain containing 1 [Source:HGNC Symbol;Acc:HGNC:30232]	17.4682	16.0096	2.91767	13.0214	12.4511	3.8754	12.7558	18.7626	4.16648	1.32669	10.2572	3.74589	1.71648	0.351818	0.71489	0.584452	0.224925
37905	0	chr21	-	4544396	4552069	ENSGALT00000058643	15	2023	MSTRG.15228	ALDH4A1	NA	00250(Alanine, aspartate and glutamate metabolism);00330(Arginine and proline metabolism)	NA	NA	aldehyde dehydrogenase 4 family member A1 [Source:HGNC Symbol;Acc:HGNC:406]	10.9787	16.3817	20.6955	11.687	12.5724	12.9488	12.2488	16.2729	16.9665	8.63216	10.3279	8.41179	4.2169	5.15165	7.29392	8.72785	8.60459
38149	0	chr21	-	6086545	6088226	ENSGALT00000081537	3	929	MSTRG.15304	C1QC	GO:0005615(extracellular space);GO:0070062(extracellular exosome);GO:0072562(blood microparticle);GO:0030853(negative regulation of granulocyte differentiation);GO:0045650(negative regulation of macrophage differentiation)	NA	NA	NA	complement C1q C chain [Source:HGNC Symbol;Acc:HGNC:1245]	4.80211	9.99507	19.9376	0.631808	1.0371	3.47879	2.75855	3.4943	4.26755	0.765856	0.813446	0.691745	1.22862	0.934156	3.46256	1.20232	0.96096
38818	0	chr22	-	4711547	4713024	ENSGALT00000078625	4	904	MSTRG.15522	ENSGALG00000042227	GO:0006629(lipid metabolic process)	NA	NA	NA	NA	3.48627	9.94706	5.84972	1.45727	1.59602	7.71383	1.52154	1.05107	0.848134	0.559541	1.11045	0.459097	0.564178	0.306936	0.973347	0.294358	0.501724
38963	0	chr23	+	1432743	1440630	ENSGALT00000001016	15	6601	MSTRG.15564	ENSGALG00000000720	GO:0005525(GTP binding);GO:0003924(GTPase activity);GO:0000166(nucleotide binding)	04621(NOD-like receptor signaling pathway)	K20899	NA	NA	2.22657	3.6544	2.77755	2.18074	1.66465	8.28807	1.57087	2.20612	2.16319	1.10859	1.02259	1.06619	0.295172	0.336063	0.515318	0.382429	0.265878
39166	0	chr23	+	2399479	2404284	ENSGALT00000068027	6	1538	MSTRG.15643	ENSGALG00000038748	NA	NA	NA	NA	NA	2.47658	2.2949	1.97845	1.00572	0.785607	0.517827	0.322182	2.36736	0.149185	0.599201	1.06663	0.876685	0.157252	0.010665	0	0.000586	0.046563
39405	0	chr23	-	4174718	4196516	ENSGALT00000065698	19	4339	MSTRG.15705	AGO3	GO:0070578(RISC-loading complex);GO:0035068(micro-ribonucleoprotein complex);GO:0016442(RISC complex);GO:0016020(membrane);GO:0005737(cytoplasm);GO:0005654(nucleoplasm);GO:0000794(condensed nuclear chromosome);GO:1901224(positive regulation of NIK/NF-kappaB signaling);GO:0072091(regulation of stem cell proliferation);GO:0035280(miRNA loading onto RISC involved in gene silencing by miRNA);GO:00352…	NA	NA	NA	argonaute 3, RISC catalytic component [Source:HGNC Symbol;Acc:HGNC:18421]	4.33501	1.5514	7.12927	4.38344	4.85611	7.19199	4.19088	1.26049	2.86466	2.15559	0	4.74713	0.184349	2.50861	2.4701	1.91393	1.59443
39542	0	chr23	-	5077324	5094745	ENSGALT00000061711	7	1344	MSTRG.15750	PTP4A2	GO:0005737(cytoplasm);GO:0070062(extracellular exosome);GO:0004725(protein tyrosine phosphatase activity);GO:0006470(protein dephosphorylation);GO:0005634(nucleus);GO:0016311(dephosphorylation);GO:0035335(peptidyl-tyrosine dephosphorylation);GO:0016791(phosphatase activity);GO:0008138(protein tyrosine/serine/threonine phosphatase activity)	NA	NA	NA	protein tyrosine phosphatase type IVA, member 2 [Source:HGNC Symbol;Acc:HGNC:9635]	5.40952	2.3988	1.72461	1.91964	1.93034	2.06591	2.01237	1.70938	1.5386	1.13427	0.484894	0.83748	0.373812	0.271391	0.762781	0.912453	1.09216
39543	0	chr23	-	5077325	5094760	ENSGALT00000005168	6	1463	MSTRG.15750	PTP4A2	GO:0005737(cytoplasm);GO:0070062(extracellular exosome);GO:0004725(protein tyrosine phosphatase activity);GO:0006470(protein dephosphorylation);GO:0005634(nucleus);GO:0016311(dephosphorylation);GO:0035335(peptidyl-tyrosine dephosphorylation);GO:0016791(phosphatase activity);GO:0008138(protein tyrosine/serine/threonine phosphatase activity)	NA	NA	NA	protein tyrosine phosphatase type IVA, member 2 [Source:HGNC Symbol;Acc:HGNC:9635]	39.7093	61.1545	45.9946	42.1575	41.4066	37.5941	32.2538	58.1248	52.8422	24.6042	49.7143	27.5963	17.1553	11.9652	23.1261	24.5725	19.2948
39592	0	chr23	-	5208886	5215305	ENSGALT00000090005	11	3151	MSTRG.15771	BSDC1	NA	NA	NA	NA	BSD domain containing 1 [Source:HGNC Symbol;Acc:HGNC:25501]	2.05575	2.97603	5.81846	2.65189	2.36424	2.86331	0	1.89047	0.686548	1.19493	3.98629	3.34672	0	1.03097	0.602521	0.456139	0.434727
39856	0	chr24	+	59373	97543	ENSGALT00000078547	15	2733	MSTRG.15820	SIK2	GO:0046777(protein autophosphorylation);GO:0006468(protein phosphorylation);GO:0000287(magnesium ion binding);GO:0005524(ATP binding);GO:0004674(protein serine/threonine kinase activity);GO:0035556(intracellular signal transduction)	NA	NA	NA	salt inducible kinase 2 [Source:HGNC Symbol;Acc:HGNC:21680]	9.91044	9.82613	8.39235	7.59493	11.1773	5.15925	5.11484	13.0661	4.11708	5.82733	2.2218	2.80827	1.8721	2.45172	1.485	1.52063	1.5694
39892	0	chr24	-	296326	299853	ENSGALT00000029889	3	659	MSTRG.15827	NRGN	GO:0005516(calmodulin binding)	NA	NA	NA	neurogranin [Source:HGNC Symbol;Acc:HGNC:8000]	18.9357	13.383	29.5678	3.11289	12.8668	9.39989	5.83993	0	10.9152	0.585487	0.815414	0.54083	1.34851	0.869608	0.068168	0.828734	0.618744
40467	0	chr24	-	5639319	5645750	ENSGALT00000012507	9	1356	MSTRG.16047	SLC37A4	GO:0005623(cell);GO:0006810(transport);GO:0005215(transporter activity);GO:0055085(transmembrane transport);GO:0016021(integral component of membrane);GO:0016020(membrane);GO:0001780(neutrophil homeostasis);GO:0001816(cytokine production);GO:0002318(myeloid progenitor cell differentiation);GO:0005977(glycogen metabolic process);GO:0006089(lactate metabolic process);GO:0006641(triglyceride metabol…	NA	NA	NA	solute carrier family 37 member 4 [Source:HGNC Symbol;Acc:HGNC:4061]	61.9912	4.2016	81.4836	13.2088	32.766	20.2406	94.2276	59.1587	114.169	15.7975	0.438158	1.27194	0.337285	2.20774	0.390585	0.108541	0.029733
40725	0	chr25	-	1286062	1293307	ENSGALT00000087034	9	1272	MSTRG.16129	ENSGALG00000040002	NA	NA	NA	NA	NA	1.18188	1.43261	1.47688	0.826897	0.150769	7.55105	0.169107	0.142688	0.036726	0.034948	0	0	0.014878	0.019332	0	0.060467	0.0215
40958	0	chr25	+	1872862	1873615	ENSGALT00000044368	3	431	MSTRG.16192	ENSGALG00000026613	GO:0046914(transition metal ion binding);GO:0046872(metal ion binding);GO:0005509(calcium ion binding)	NA	NA	NA	NA	4.43686	1.00595	1.29964	4.34562	1.7311	3.85174	0.291718	0.158794	0.699605	0.291153	1.01955	0.46	0.049224	0.22784	0.416914	0.474639	0.213317
41007	0	chr25	-	2076620	2080621	ENSGALT00000056286	6	2188	MSTRG.16156	SLC39A1	GO:0005886(plasma membrane);GO:0001701(in utero embryonic development);GO:0005385(zinc ion transmembrane transporter activity);GO:0006829(zinc II ion transport);GO:0060173(limb development);GO:0048701(embryonic cranial skeleton morphogenesis);GO:0071577(zinc II ion transmembrane transport)	NA	NA	NA	solute carrier family 39 member 1 [Source:HGNC Symbol;Acc:HGNC:12876]	0	1.21561	4.73294	3.53791	7.46352	1.36966	9.29624	4.86057	2.50819	0.773584	0	0	0.583294	0.313915	0	0.061095	0.438912
41217	0	chr25	-	2580940	2585553	ENSGALT00000001122	8	1530	MSTRG.16267	CTSS	GO:0043231(intracellular membrane-bounded organelle);GO:0005764(lysosome);GO:0005615(extracellular space);GO:2001259(positive regulation of cation channel activity);GO:0097067(cellular response to thyroid hormone stimulus);GO:0051603(proteolysis involved in cellular protein catabolic process);GO:0048002(antigen processing and presentation of peptide antigen);GO:0034769(basement membrane disassemb…	04145(Phagosome);04142(Lysosome);04210(Apoptosis)	K01368	EC:3.4.22.27	cathepsin S [Source:HGNC Symbol;Acc:HGNC:2545]	17.0112	13.5261	11.9853	12.3774	2.09803	90.4392	3.43517	5.00847	4.80517	0	4.05259	2.38315	0.787176	0	3.49251	0	0
41276	0	chr25	+	2694151	2698197	ENSGALT00000042974	10	1235	MSTRG.16282	PSMD4	GO:0008540(proteasome regulatory particle, base subcomplex);GO:0043248(proteasome assembly);GO:0043161(proteasome-mediated ubiquitin-dependent protein catabolic process);GO:0005829(cytosol);GO:0031593(polyubiquitin modification-dependent protein binding);GO:0005634(nucleus);GO:0006511(ubiquitin-dependent protein catabolic process);GO:0005654(nucleoplasm);GO:0022624(proteasome accessory complex)	03050(Proteasome)	K03029	NA	proteasome 26S subunit, non-ATPase 4 [Source:HGNC Symbol;Acc:HGNC:9561]	25.7964	31.0236	26.8705	27.6587	29.1678	30.0999	26.7699	25.1132	29.8133	17.4216	19.437	14.491	8.54676	9.30463	12.0995	13.2968	14.9041
41315	0	chr25	+	2829873	2845769	ENSGALT00000085273	13	1756	MSTRG.16230	SNX27	NA	NA	NA	NA	sorting nexin family member 27 [Source:HGNC Symbol;Acc:HGNC:20073]	9.16786	10.2248	8.26164	8.73699	9.07948	9.72039	6.55498	7.52057	8.16593	4.0903	6.60755	5.08728	4.35966	2.64894	3.32542	4.16781	3.52052
41316	0	chr25	+	2829873	2845779	ENSGALT00000080013	13	1766	MSTRG.16230	SNX27	NA	NA	NA	NA	sorting nexin family member 27 [Source:HGNC Symbol;Acc:HGNC:20073]	9.42702	10.1669	8.19951	8.68752	9.10177	9.62506	6.4815	7.50596	8.10126	4.06714	6.57103	5.05847	4.33539	2.63423	3.30681	4.03255	3.50288
41628	0	chr26	+	1096733	1102409	ENSGALT00000000132	7	1253	MSTRG.16351	ENSGALG00000000094	GO:0033211(adiponectin-activated signaling pathway);GO:0042562(hormone binding);GO:0007186(G-protein coupled receptor signaling pathway);GO:0004872(receptor activity);GO:0005886(plasma membrane);GO:0016021(integral component of membrane);GO:0016020(membrane)	04920(Adipocytokine signaling pathway)	K07297	NA	NA	17.8723	12.76	15.562	8.13261	17.2192	13.2191	12.9952	14.7681	12.3052	13.7735	11.109	10.2129	6.11308	5.16506	10.5126	7.11008	9.42111
41667	0	chr26	-	1190495	1200874	ENSGALT00000048558	20	2349	MSTRG.16369	SORT1	GO:0005886(plasma membrane);GO:0005829(cytosol);GO:0009986(cell surface);GO:0048471(perinuclear region of cytoplasm);GO:0019899(enzyme binding);GO:0031410(cytoplasmic vesicle);GO:0005794(Golgi apparatus);GO:0048406(nerve growth factor binding);GO:0016021(integral component of membrane);GO:0007186(G-protein coupled receptor signaling pathway);GO:0030140(trans-Golgi network transport vesicle);GO:00…	04142(Lysosome)	K12388	NA	sortilin 1 [Source:HGNC Symbol;Acc:HGNC:11186]	27.529	13.8541	43.6742	35.3111	38.4671	45.022	31.6854	43.8405	55.0475	12.3759	23.1846	13.3724	11.4645	18.0055	6.5277	7.47727	7.51754
41737	0	chr26	+	1541534	1550279	ENSGALT00000000700	8	1532	MSTRG.16392	KCTD20	GO:0005737(cytoplasm);GO:0042327(positive regulation of phosphorylation)	NA	NA	NA	potassium channel tetramerization domain containing 20 [Source:HGNC Symbol;Acc:HGNC:21052]	32.3973	22.0041	36.1073	0.247501	8.34948	1.80433	32.1685	4.42271	48.0629	1.27134	0.607071	10.6124	0.506916	0.839974	0.184646	2.35672	0.69868
41746	0	chr26	+	1588453	1591609	ENSGALT00000044994	3	1532	MSTRG.16390	CDKN1A	GO:0007346(regulation of mitotic cell cycle);GO:0007050(cell cycle arrest);GO:0005634(nucleus);GO:0004861(cyclin-dependent protein serine/threonine kinase inhibitor activity);GO:0019912(cyclin-dependent protein kinase activating kinase activity);GO:0030332(cyclin binding);GO:0031625(ubiquitin protein ligase binding);GO:0000079(regulation of cyclin-dependent protein serine/threonine kinase activit…	04012(ErbB signaling pathway);04068(FoxO signaling pathway);04110(Cell cycle);04115(p53 signaling pathway);04218(Cellular senescence)	K06625	NA	cyclin-dependent kinase inhibitor 1A (p21, Cip1) [Source:RefSeq peptide;Acc:NP_989727]	8.51471	19.4639	25.7132	11.9319	11.9963	8.29122	3.78437	7.87296	2.34246	1.23616	1.38357	0.964643	5.32412	4.10119	0.567328	0.455778	0.345635
41947	0	chr26	+	2686743	2697121	ENSGALT00000001781	11	1900	MSTRG.16498	ENSGALG00000001175	GO:0016021(integral component of membrane);GO:0016020(membrane)	NA	NA	NA	NA	6.15147	6.92336	4.93648	3.424	3.95575	5.38429	4.909	5.33848	3.74037	3.83222	5.36032	2.22835	1.46835	1.16681	0.489	1.55095	2.67598
42039	0	chr26	-	3550497	3556153	ENSGALT00000002385	5	1327	MSTRG.16521	RHOC	GO:0032154(cleavage furrow);GO:0000281(mitotic cytokinesis);GO:1902766(skeletal muscle satellite cell migration);GO:0044319(wound healing, spreading of cells);GO:0007264(small GTPase mediated signal transduction);GO:0005525(GTP binding);GO:0003924(GTPase activity);GO:0005886(plasma membrane);GO:0005622(intracellular);GO:0000166(nucleotide binding);GO:0016020(membrane);GO:0004871(signal transducer…	NA	NA	NA	ras homolog family member C [Source:HGNC Symbol;Acc:HGNC:669]	4.3236	4.78405	9.98474	3.75228	3.44576	6.81156	4.22487	3.4069	3.27912	5.21666	6.41392	5.49007	2.44298	1.99734	0.930276	0.741907	0.923836
42040	0	chr26	-	3558025	3564463	ENSGALT00000002440	10	1488	MSTRG.16515	PPM1J	GO:0006470(protein dephosphorylation);GO:0004722(protein serine/threonine phosphatase activity);GO:0003824(catalytic activity)	NA	NA	NA	protein phosphatase, Mg2+/Mn2+ dependent 1J [Source:HGNC Symbol;Acc:HGNC:20785]	6.43134	6.53326	11.4835	4.36907	6.00485	6.67274	3.29135	3.71193	5.12486	0.318861	0.564281	0.481425	0.247104	0.250137	0.32917	0	0.139046
42168	0	chr26	+	4312154	4343994	ENSGALT00000074053	5	4561	MSTRG.16555	C6orf106	GO:0016236(macroautophagy);GO:0005776(autophagosome);GO:0043130(ubiquitin binding);GO:0000407(pre-autophagosomal structure)	NA	NA	NA	chromosome 6 open reading frame 106 [Source:HGNC Symbol;Acc:HGNC:21215]	27.549	7.016	20.1811	28.3227	31.6126	19.7638	17.147	8.88333	24.3594	16.7543	5.90869	17.1554	7.10371	8.66586	10.228	7.07685	10.5372
42169	0	chr26	+	4312216	4331724	ENSGALT00000083846	4	1021	MSTRG.16555	C6orf106	GO:0016236(macroautophagy);GO:0005776(autophagosome);GO:0043130(ubiquitin binding);GO:0000407(pre-autophagosomal structure)	NA	NA	NA	chromosome 6 open reading frame 106 [Source:HGNC Symbol;Acc:HGNC:21215]	65.4939	71.4501	45.4388	61.5862	77.1909	68.3211	47.0387	55.3162	55.6245	30.7046	28.4001	21.2113	21.7761	23.7652	27.8069	30.162	23.3353
42262	0	chr26	-	4927628	4931260	ENSGALT00000068468	9	1647	MSTRG.16587	TFEB	NA	04137(Mitophagy - animal)	K15590	NA	transcription factor EB [Source:HGNC Symbol;Acc:HGNC:11753]	4.21152	4.08308	3.98616	4.69032	3.62933	4.8481	3.44538	2.27436	1.2383	1.83149	2.3094	3.77261	1.04194	1.37641	0.706355	1.07588	0.643473
42359	0	chr27	-	181409	221892	ENSGALT00000076317	5	965	MSTRG.16615	ENSGALG00000036395	NA	NA	NA	NA	NA	3.65832	3.88626	1.93869	1.01496	0.722454	19.5455	0.432861	0.565324	0.256164	0.073841	0.122544	0.092712	0.047173	0	0.030521	0.031974	0.025686
42740	0	chr27	+	3167852	3172249	ENSGALT00000053036	12	1832	MSTRG.16790	SLC25A39	NA	NA	NA	NA	solute carrier family 25 member 39 [Source:HGNC Symbol;Acc:HGNC:24279]	4.12778	5.61867	5.29573	2.52498	4.32956	4.21052	2.13758	2.52836	3.43149	0.88702	1.4433	1.53931	0.292011	0.222474	0.674633	0.825946	0.672897
42795	0	chr27	+	3491892	3498724	ENSGALT00000059066	3	1660	MSTRG.16810	DUSP3	GO:0001772(immunological synapse);GO:0035335(peptidyl-tyrosine dephosphorylation);GO:0008138(protein tyrosine/serine/threonine phosphatase activity);GO:0004725(protein tyrosine phosphatase activity);GO:0070373(negative regulation of ERK1 and ERK2 cascade);GO:0005829(cytosol);GO:0005634(nucleus);GO:0005654(nucleoplasm);GO:0070062(extracellular exosome);GO:0019901(protein kinase binding);GO:0006470…	04010(MAPK signaling pathway)	K17614	EC:3.1.3.16;EC:3.1.3.48	dual specificity phosphatase 3 [Source:HGNC Symbol;Acc:HGNC:3069]	21.0655	7.86894	5.83388	31.1564	9.85588	5.86705	6.51783	9.62821	16.9841	3.20267	2.61768	3.11791	0.952389	1.2182	1.15575	1.20957	0.623803
42906	0	chr27	-	4179407	4218504	ENSGALT00000078057	7	4271	MSTRG.16863	NFE2L1	GO:0034599(cellular response to oxidative stress);GO:0000976(transcription regulatory region sequence-specific DNA binding);GO:0045893(positive regulation of transcription, DNA-templated);GO:0045944(positive regulation of transcription from RNA polymerase II promoter);GO:0006357(regulation of transcription from RNA polymerase II promoter);GO:0003700(transcription factor activity, sequence-specifi…	NA	NA	NA	Nuclear factor erythroid 2-related factor 1 [Source:UniProtKB/Swiss-Prot;Acc:Q5ZL67]	6.68902	6.05849	11.5191	5.03591	6.69947	6.20641	5.67929	6.58885	5.87134	6.28752	6.37497	4.24818	1.02858	0.899932	1.19567	1.15347	1.07324
43822	0	chr28	+	2143380	2155407	ENSGALT00000001502	9	1677	MSTRG.17153	BTBD2	GO:0000932(P-body);GO:0019005(SCF ubiquitin ligase complex);GO:0043161(proteasome-mediated ubiquitin-dependent protein catabolic process);GO:0030162(regulation of proteolysis);GO:0022008(neurogenesis);GO:0005829(cytosol);GO:0042787(protein ubiquitination involved in ubiquitin-dependent protein catabolic process);GO:0031625(ubiquitin protein ligase binding)	NA	NA	NA	BTB domain containing 2 [Source:HGNC Symbol;Acc:HGNC:15504]	14.0486	16.5804	19.9432	14.7167	14.4057	20.9901	8.9894	11.2083	17.3203	14.287	14.8717	16.0426	6.28668	4.80785	6.92883	4.95784	5.92051
43998	0	chr28	+	2853995	2855704	ENSGALT00000047341	5	795	MSTRG.17198	CFD	NA	NA	NA	NA	complement factor D [Source:HGNC Symbol;Acc:HGNC:2771]	26.5633	63.6636	31.2827	13.4121	12.7803	98.5163	11.077	20.2722	17.236	15.9431	17.6288	4.96381	15.8723	10.2827	5.31862	9.4827	5.12029
44021	0	chr28	-	2916687	2926075	ENSGALT00000003154	11	2217	MSTRG.17205	TMEM259	GO:0005783(endoplasmic reticulum);GO:1904294(positive regulation of ERAD pathway);GO:1901215(negative regulation of neuron death);GO:0034976(response to endoplasmic reticulum stress);GO:0016021(integral component of membrane);GO:0016020(membrane)	NA	NA	NA	transmembrane protein 259 [Source:HGNC Symbol;Acc:HGNC:17039]	13.7159	17.4441	17.7219	20.4573	20.6045	24.9968	10.9678	10.8958	18.4451	10.1803	9.97331	7.59565	3.8709	7.94238	5.61823	9.32387	7.97089
44473	0	chr28	+	4356516	4388732	ENSGALT00000055864	25	2799	MSTRG.17338	EPS15L1	GO:0045296(cadherin binding);GO:0016020(membrane);GO:0030132(clathrin coat of coated pit);GO:0005509(calcium ion binding)	NA	NA	NA	epidermal growth factor receptor pathway substrate 15 like 1 [Source:HGNC Symbol;Acc:HGNC:24634]	4.79296	2.50775	2.47537	0.720905	2.55959	1.14885	0.922352	0.457051	1.25954	0.917208	1.80509	1.66777	0.260778	0.973867	0	0.159224	0.167608
44714	0	chr3	-	2356977	2398915	ENSGALT00000068970	25	6523	MSTRG.17416	XPO1	GO:0005634(nucleus);GO:0000776(kinetochore);GO:0016020(membrane);GO:0006611(protein export from nucleus);GO:0005829(cytosol);GO:0043231(intracellular membrane-bounded organelle);GO:0030529(intracellular ribonucleoprotein complex);GO:0043234(protein complex);GO:0031965(nuclear membrane);GO:0008565(protein transporter activity);GO:0005737(cytoplasm);GO:0000055(ribosomal large subunit export from nu…	03013(RNA transport);03008(Ribosome biogenesis in eukaryotes);05164(Influenza A)	K14290	NA	exportin 1 [Source:HGNC Symbol;Acc:HGNC:12825]	20.3145	21.0362	11.0156	13.9555	9.39209	16.2503	10.8097	14.0614	8.28764	11.8535	4.13821	5.60759	1.08403	7.38287	0.964831	0.585468	1.54916
44798	0	chr3	-	2881798	2927898	ENSGALT00000082577	4	1002	MSTRG.17432	ACYP2	GO:0005739(mitochondrion);GO:0003998(acylphosphatase activity);GO:0016787(hydrolase activity)	00620(Pyruvate metabolism)	K01512	EC:3.6.1.7	acylphosphatase 2 [Source:HGNC Symbol;Acc:HGNC:180]	6.81528	0.869056	0.683484	0.963237	1.98897	0.780527	1.63774	2.35429	0.848342	0.264186	0.143233	0.055551	0.113144	0	0.027213	0.148158	0.112549
44805	0	chr3	+	2953831	3011366	ENSGALT00000043729	46	5821	MSTRG.17418	PSME4	GO:0070628(proteasome binding);GO:0016504(peptidase activator activity);GO:1990111(spermatoproteasome complex);GO:0005829(cytosol);GO:0005654(nucleoplasm);GO:0005634(nucleus);GO:0035093(spermatogenesis, exchange of chromosomal proteins);GO:0010499(proteasomal ubiquitin-independent protein catabolic process);GO:0006974(cellular response to DNA damage stimulus);GO:0006281(DNA repair);GO:0070577(lys…	03050(Proteasome)	K06699	NA	proteasome activator subunit 4 [Source:HGNC Symbol;Acc:HGNC:20635]	54.9484	26.6957	18.8368	0.233238	1.04709	2.53861	1.19621	5.39721	6.34068	1.72062	1.02558	5.22963	1.11563	0.951932	1.69702	0.555318	0.168656
45027	0	chr3	+	4595975	4620787	ENSGALT00000042907	3	300	MSTRG.17515	ENSGALG00000023773	NA	NA	NA	NA	NA	4.67903	4.69056	2.49705	5.29745	4.25762	2.77344	3.60523	4.47692	4.68422	0.553905	6.25655	1.13816	0.544127	0.675142	0.660093	0.420806	0.269886
45166	0	chr3	+	8773712	8784473	ENSGALT00000039625	10	4029	MSTRG.17576	MSH6	GO:0009411(response to UV);GO:0008630(intrinsic apoptotic signaling pathway in response to DNA damage);GO:0043231(intracellular membrane-bounded organelle);GO:0032301(MutSalpha complex);GO:0005829(cytosol);GO:0005794(Golgi apparatus);GO:0005654(nucleoplasm);GO:0000790(nuclear chromatin);GO:0097193(intrinsic apoptotic signaling pathway);GO:0051096(positive regulation of helicase activity);GO:00459…	03430(Mismatch repair)	NA	NA	mutS homolog 6 [Source:HGNC Symbol;Acc:HGNC:7329]	9.84687	8.37946	7.46512	6.16157	4.51509	4.88088	5.90212	6.84937	8.59965	6.54227	2.19051	2.95343	0.633541	0.901885	3.79996	0.921204	2.01383
45277	0	chr3	+	9738594	9744732	ENSGALT00000044527	5	2874	MSTRG.17610	LGALSL	GO:0005622(intracellular);GO:0005737(cytoplasm);GO:0030246(carbohydrate binding)	NA	NA	NA	Galectin-related protein [Source:UniProtKB/Swiss-Prot;Acc:Q5ZHQ2]	6.17743	8.08228	1.20811	7.57801	4.37035	5.33367	5.34757	4.68141	6.74182	2.49308	2.41996	1.25144	0.511246	0.921365	0.339946	1.20325	1.5134
45827	0	chr3	+	16548497	16555581	ENSGALT00000069270	8	1030	MSTRG.17892	SRSF7	GO:0003723(RNA binding);GO:0003676(nucleic acid binding);GO:0008270(zinc ion binding)	03040(Spliceosome);05168(Herpes simplex infection)	NA	NA	NA	6.90625	8.41443	9.03374	3.76806	4.89	13.3287	2.60222	1.36747	1.56038	0.906522	1.06368	2.18184	1.05504	0.177728	0.331747	0.540217	0.230413
45842	0	chr3	-	16622267	16663179	ENSGALT00000071646	22	3960	MSTRG.17907	SOS1	GO:0005737(cytoplasm);GO:0001942(hair follicle development);GO:0007264(small GTPase mediated signal transduction);GO:0035264(multicellular organism growth);GO:0007173(epidermal growth factor receptor signaling pathway);GO:0060021(palate development);GO:0003007(heart morphogenesis);GO:0048514(blood vessel morphogenesis);GO:2000973(regulation of pro-B cell differentiation);GO:0005088(Ras guanyl-nuc…	04010(MAPK signaling pathway);04012(ErbB signaling pathway);04068(FoxO signaling pathway);04150(mTOR signaling pathway);04510(Focal adhesion);04540(Gap junction);04810(Regulation of actin cytoskeleton);04910(Insulin signaling pathway);04912(GnRH signaling pathway)	K03099	NA	SOS Ras/Rac guanine nucleotide exchange factor 1 [Source:HGNC Symbol;Acc:HGNC:11187]	14.0522	15.7064	13.0409	16.8047	14.3058	11.9771	11.11	11.4452	9.92702	12.0321	11.1694	9.45978	3.98458	2.86561	2.95471	4.51389	1.85384
46684	0	chr3	+	26793520	26809132	ENSGALT00000016260	5	646	MSTRG.18340	RHOQ	GO:0005886(plasma membrane);GO:0045944(positive regulation of transcription from RNA polymerase II promoter);GO:0032869(cellular response to insulin stimulus);GO:0070062(extracellular exosome);GO:0008360(regulation of cell shape);GO:0046326(positive regulation of glucose import);GO:0045121(membrane raft);GO:0005884(actin filament);GO:0003924(GTPase activity);GO:0046039(GTP metabolic process);GO:0…	04910(Insulin signaling pathway)	K07194	NA	ras homolog family member Q [Source:HGNC Symbol;Acc:HGNC:17736]	71.7263	76.0579	38.8107	95.7554	73.5998	54.594	63.0471	67.0139	48.6365	8.5748	7.8819	6.40186	6.22455	8.59678	9.13994	10.8876	6.58981
46995	0	chr3	+	30929887	30940604	ENSGALT00000016762	10	1756	MSTRG.18468	ENSGALG00000010303	GO:0033961(cis-stilbene-oxide hydrolase activity);GO:0003824(catalytic activity);GO:0016021(integral component of membrane);GO:0016020(membrane)	00980(Metabolism of xenobiotics by cytochrome P450)	K01253	EC:3.3.2.9	NA	2.51019	5.15071	5.53133	5.46413	5.15143	5.37276	4.53418	4.18295	2.76956	2.46756	2.13143	2.61388	1.46066	2.01593	0	1.17001	0.959587
47208	0	chr3	+	33756721	33782296	ENSGALT00000017288	9	1518	MSTRG.18535	MEMO1	GO:0032886(regulation of microtubule-based process);GO:0005829(cytosol);GO:0005634(nucleus);GO:0005737(cytoplasm)	NA	NA	NA	mediator of cell motility 1 [Source:HGNC Symbol;Acc:HGNC:14014]	28.0673	23.3335	22.1253	30.4462	21.3723	14.5754	23.6008	25.3959	20.1048	9.66418	10.1891	6.84708	5.82002	5.62798	7.20057	2.53838	7.50967
47450	0	chr3	-	38224970	38241776	ENSGALT00000050858	4	1411	MSTRG.18685	GGPS1	GO:0042802(identical protein binding);GO:0004311(farnesyltranstransferase activity);GO:0004337(geranyltranstransferase activity);GO:0006720(isoprenoid metabolic process)	00900(Terpenoid backbone biosynthesis)	NA	NA	geranylgeranyl diphosphate synthase 1 [Source:HGNC Symbol;Acc:HGNC:4249]	7.94527	6.60077	3.91514	6.97038	4.70278	4.92499	6.62061	6.40519	0.48028	0.659794	2.9968	0.424111	3.98422	0.7916	1.30676	1.03268	1.41641
47559	0	chr3	-	39895267	39898867	ENSGALT00000018018	5	1626	MSTRG.18759	SPRTN	GO:0016607(nuclear speck);GO:0005654(nucleoplasm);GO:0005634(nucleus);GO:0031398(positive regulation of protein ubiquitination);GO:0019985(translesion synthesis);GO:0009411(response to UV);GO:0006974(cellular response to DNA damage stimulus);GO:0070530(K63-linked polyubiquitin modification-dependent protein binding);GO:0043130(ubiquitin binding);GO:0031593(polyubiquitin modification-dependent pro…	NA	NA	NA	SprT-like N-terminal domain [Source:HGNC Symbol;Acc:HGNC:25356]	2.70896	2.05029	2.27791	2.00387	2.40144	1.43903	1.6009	1.57693	0.918622	0.387949	0.059343	1.35323	0.029123	0.229267	0	0.045881	0.320159
47589	0	chr3	-	40139164	40141499	ENSGALT00000088724	7	1477	MSTRG.18771	ACTA1	GO:0005865(striated muscle thin filament);GO:0001725(stress fiber);GO:0048741(skeletal muscle fiber development);GO:0030240(skeletal muscle thin filament assembly);GO:0030017(sarcomere);GO:0005884(actin filament);GO:0005615(extracellular space);GO:0015629(actin cytoskeleton);GO:0070062(extracellular exosome);GO:0072562(blood microparticle);GO:0005515(protein binding);GO:0005856(cytoskeleton);GO:0…	NA	NA	NA	Actin, alpha skeletal muscle [Source:UniProtKB/Swiss-Prot;Acc:P68139]	9833.73	12068.2	14387.7	14769.4	14516.4	12166.5	11518	13622.3	17133.5	3014.82	4828.11	3780.57	2159.7	2697.75	130.715	166.658	145.161
47939	0	chr3	-	45724298	45727244	ENSGALT00000018992	4	1208	MSTRG.18951	MRPL18	GO:0005762(mitochondrial large ribosomal subunit);GO:0005739(mitochondrion);GO:0005615(extracellular space);GO:0035928(rRNA import into mitochondrion);GO:0008097(5S rRNA binding);GO:0005840(ribosome);GO:0003735(structural constituent of ribosome);GO:0006412(translation);GO:0005622(intracellular)	03010(Ribosome)	NA	NA	mitochondrial ribosomal protein L18 [Source:HGNC Symbol;Acc:HGNC:14477]	9.73987	16.3032	11.4001	8.98121	12.1141	12.8999	10.7559	8.91751	14.3175	8.28888	8.90982	6.06587	2.86644	3.75774	4.07936	4.14359	5.0598
47985	0	chr3	+	46143343	46415545	ENSGALT00000081343	71	10360	MSTRG.18966	UTRN	GO:0045211(postsynaptic membrane);GO:0045202(synapse);GO:0030054(cell junction);GO:0005856(cytoskeleton);GO:0003779(actin binding);GO:0005737(cytoplasm);GO:0005886(plasma membrane);GO:0046872(metal ion binding);GO:0008270(zinc ion binding);GO:0016020(membrane);GO:0005654(nucleoplasm);GO:0070062(extracellular exosome);GO:0030175(filopodium);GO:0019901(protein kinase binding);GO:0031594(neuromuscul…	NA	NA	NA	utrophin [Source:HGNC Symbol;Acc:HGNC:12635]	0.706824	2.22554	0.195765	1.34737	1.7717	2.933	0.040576	1.73372	3.13112	0.027073	0.611243	0.006176	0.027873	0.020466	0.016119	0.079488	0.046563
48432	0	chr3	-	54208130	54231058	ENSGALT00000022435	4	2076	MSTRG.19122	HECA	GO:0016020(membrane);GO:0005737(cytoplasm);GO:0005634(nucleus);GO:0045930(negative regulation of mitotic cell cycle)	NA	NA	NA	hdc homolog, cell cycle regulator [Source:HGNC Symbol;Acc:HGNC:21041]	6.55283	6.71749	2.83501	4.82558	4.53484	6.94394	3.49744	3.23591	2.0082	2.70928	4.92069	2.48241	1.24486	0.80615	1.30875	1.54899	0.99265
48574	0	chr3	+	56395893	56424175	ENSGALT00000022653	5	2109	MSTRG.19169	SLC2A12	GO:0016020(membrane);GO:0015758(glucose transport);GO:0046323(glucose import);GO:0035428(hexose transmembrane transport);GO:0005355(glucose transmembrane transporter activity);GO:0005351(sugar:proton symporter activity);GO:1904659(glucose transmembrane transport);GO:0015992(proton transport);GO:0022857(transmembrane transporter activity);GO:0006810(transport);GO:0005215(transporter activity);GO:0…	NA	NA	NA	solute carrier family 2 member 12 [Source:HGNC Symbol;Acc:HGNC:18067]	11.0722	7.45951	6.80614	8.06079	9.40403	7.0525	15.1361	11.0361	12.7827	2.8863	0.178014	1.40455	2.23435	2.59712	1.08942	0.592012	0.847131
48641	0	chr3	+	57005141	57009927	ENSGALT00000056157	7	1491	MSTRG.19181	ENSGALG00000013993	GO:0015939(pantothenate metabolic process);GO:0017159(pantetheine hydrolase activity);GO:0016811(hydrolase activity, acting on carbon-nitrogen (but not peptide) bonds, in linear amides);GO:0006807(nitrogen compound metabolic process);GO:0016810(hydrolase activity, acting on carbon-nitrogen (but not peptide) bonds)	00770(Pantothenate and CoA biosynthesis)	K08069	EC:3.5.1.92	NA	1.9091	2.33557	1.16809	0.669982	0.358451	3.14629	0.470728	0.660078	0.868787	1.19412	1.07889	0.94277	0.725236	0.854202	0.08086	0.218362	0.215071
48650	0	chr3	+	57097209	57149346	ENSGALT00000004596	12	2312	MSTRG.19185	MOXD1	GO:0005789(endoplasmic reticulum membrane);GO:0016715(oxidoreductase activity, acting on paired donors, with incorporation or reduction of molecular oxygen, reduced ascorbate as one donor, and incorporation of one atom of oxygen);GO:0004497(monooxygenase activity);GO:0003824(catalytic activity);GO:0055114(oxidation-reduction process);GO:0005507(copper ion binding)	NA	NA	NA	monooxygenase DBH like 1 [Source:HGNC Symbol;Acc:HGNC:21063]	10.9256	5.64703	13.638	8.24507	4.26837	11.4383	1.73648	2.83582	4.0008	1.79327	2.7051	3.28295	0.405454	0.739562	1.84291	1.33558	1.33059
49210	0	chr3	+	67233670	67305744	ENSGALT00000065874	11	1695	MSTRG.19473	SESN1	GO:1904262(negative regulation of TORC1 signaling);GO:0034198(cellular response to amino acid starvation);GO:0005737(cytoplasm);GO:0005634(nucleus);GO:0001650(fibrillar center);GO:0042149(cellular response to glucose starvation);GO:0072593(reactive oxygen species metabolic process);GO:0061700(GATOR2 complex);GO:0070728(leucine binding);GO:0098869(cellular oxidant detoxification);GO:1901031(regula…	04115(p53 signaling pathway)	NA	NA	sestrin 1 [Source:HGNC Symbol;Acc:HGNC:21595]	86.3092	111.055	37.3388	20.2001	15.9277	10.1163	11.6323	35.6836	25.5797	35.2004	19.0473	32.8051	1.12566	2.57494	2.04484	1.38685	0.725579
49233	0	chr3	+	67293721	67306780	ENSGALT00000024673	10	2499	MSTRG.19473	SESN1	GO:1904262(negative regulation of TORC1 signaling);GO:0034198(cellular response to amino acid starvation);GO:0005737(cytoplasm);GO:0005634(nucleus);GO:0001650(fibrillar center);GO:0042149(cellular response to glucose starvation);GO:0072593(reactive oxygen species metabolic process);GO:0061700(GATOR2 complex);GO:0070728(leucine binding);GO:0098869(cellular oxidant detoxification);GO:1901031(regula…	04115(p53 signaling pathway)	NA	NA	sestrin 1 [Source:HGNC Symbol;Acc:HGNC:21595]	29.6931	75.2245	11.5909	10.133	9.55733	6.57905	14.7785	24.9354	19.2325	13.5603	5.34425	13.1687	8.45417	7.31785	3.41882	2.3902	4.84467
49343	0	chr3	+	68961168	69004120	ENSGALT00000088084	8	1527	MSTRG.19518	PREP	GO:0016020(membrane);GO:0005829(cytosol);GO:0005737(cytoplasm);GO:0005634(nucleus);GO:0070008(serine-type exopeptidase activity);GO:0008236(serine-type peptidase activity);GO:0006508(proteolysis);GO:0004252(serine-type endopeptidase activity)	NA	NA	NA	prolyl endopeptidase [Source:HGNC Symbol;Acc:HGNC:9358]	7.2658	8.62266	5.74617	6.88227	8.94532	11.8963	9.42792	9.59878	6.86735	0	4.57402	0.087813	0.036144	0.152043	0.31511	0.066879	0.794394
49355	0	chr3	+	69051906	69078558	ENSGALT00000037249	8	1624	MSTRG.19525	BVES	GO:0008360(regulation of cell shape);GO:0043087(regulation of GTPase activity);GO:0051260(protein homooligomerization);GO:0007519(skeletal muscle tissue development);GO:0007507(heart development);GO:0044214(spanning component of plasma membrane);GO:0005515(protein binding);GO:0016192(vesicle-mediated transport);GO:0030552(cAMP binding);GO:0048471(perinuclear region of cytoplasm);GO:0005923(bicell…	04530(Tight junction)	NA	NA	blood vessel epicardial substance [Source:HGNC Symbol;Acc:HGNC:1152]	20.4363	18.393	30.3965	27.6583	24.0456	40.4314	5.48012	24.2744	25.6502	6.79582	10.0337	13.7749	4.94076	4.21723	4.89843	1.63601	1.11965
49509	0	chr3	+	75635314	75677776	ENSGALT00000025160	4	2475	MSTRG.19589	BACH2	GO:0005829(cytosol);GO:0005634(nucleus);GO:0006355(regulation of transcription, DNA-templated);GO:0000122(negative regulation of transcription from RNA polymerase II promoter);GO:0003700(transcription factor activity, sequence-specific DNA binding);GO:0003677(DNA binding);GO:0001206(transcriptional repressor activity, RNA polymerase II distal enhancer sequence-specific binding);GO:0000980(RNA pol…	NA	NA	NA	BTB domain and CNC homolog 2 [Source:HGNC Symbol;Acc:HGNC:14078]	2.56719	2.71161	3.32122	1.99026	1.3375	1.26458	0.429967	1.38552	2.06809	1.40775	2.66528	0.874064	1.11269	1.15651	0.483938	0.194463	0.272348
50759	0	chr3	+	104293575	104434614	ENSGALT00000061766	10	3120	MSTRG.20161	KLHL29	GO:0042787(protein ubiquitination involved in ubiquitin-dependent protein catabolic process);GO:0031463(Cul3-RING ubiquitin ligase complex);GO:0004842(ubiquitin-protein transferase activity)	NA	NA	NA	kelch like family member 29 [Source:HGNC Symbol;Acc:HGNC:29404]	2.87019	0.041423	0.668447	1.8485	1.89562	1.55781	1.00903	0	2.51106	0.78602	0.743912	0.066212	0.030702	1.23329	0.110541	0.192175	0.305154
50774	0	chr3	+	104524268	104541302	ENSGALT00000026614	7	2128	MSTRG.20166	UBXN2A	GO:0031468(nuclear envelope reassembly);GO:0019888(protein phosphatase regulator activity);GO:0043161(proteasome-mediated ubiquitin-dependent protein catabolic process);GO:0007030(Golgi organization);GO:0043130(ubiquitin binding);GO:0050790(regulation of catalytic activity);GO:0005829(cytosol);GO:0000045(autophagosome assembly);GO:0061025(membrane fusion);GO:0005634(nucleus);GO:0033130(acetylchol…	NA	NA	NA	UBX domain protein 2A [Source:HGNC Symbol;Acc:HGNC:27265]	26.3975	11.2634	12.497	18.2284	10.9128	5.9521	12.3677	15.8416	2.76968	3.20304	2.39195	1.38063	1.92546	0.977514	0.757174	0.1037	0.757691
50913	0	chr3	-	105024023	105028422	ENSGALT00000077336	7	1043	MSTRG.20160	MAPRE3	GO:0042802(identical protein binding);GO:0005737(cytoplasm);GO:0045893(positive regulation of transcription, DNA-templated);GO:0005874(microtubule);GO:0035371(microtubule plus-end);GO:0008017(microtubule binding);GO:0045737(positive regulation of cyclin-dependent protein serine/threonine kinase activity);GO:1903033(positive regulation of microtubule plus-end binding);GO:0015630(microtubule cytosk…	NA	NA	NA	microtubule associated protein RP/EB family member 3 [Source:HGNC Symbol;Acc:HGNC:6892]	10.2135	14.1862	12.1548	10.8006	11.7205	11.0931	6.52922	9.48048	11.174	9.08718	12.4085	6.09536	3.59683	3.04618	5.06113	5.58968	4.28937
51226	0	chr3	-	107829342	107838487	ENSGALT00000087827	10	1302	MSTRG.20349	CTSB	GO:0048471(perinuclear region of cytoplasm);GO:0005764(lysosome);GO:0030855(epithelial cell differentiation);GO:0070062(extracellular exosome);GO:0043231(intracellular membrane-bounded organelle);GO:0005739(mitochondrion);GO:0005730(nucleolus);GO:0005615(extracellular space);GO:0005518(collagen binding);GO:0008233(peptidase activity);GO:0006508(proteolysis);GO:0097067(cellular response to thyroid…	04142(Lysosome);04140(Autophagy - animal);04210(Apoptosis);04621(NOD-like receptor signaling pathway)	NA	NA	cathepsin B [Source:HGNC Symbol;Acc:HGNC:2527]	62.1789	59.8502	59.7428	55.3174	36.8273	161.696	34.6036	43.6119	35.4095	43.9048	46.6613	43.8305	23.2118	18.799	13.07	14.0352	15.1841
51365	0	chr3	-	110408257	110440867	ENSGALT00000026982	7	2839	MSTRG.20435	TNFRSF21	GO:0031226(intrinsic component of plasma membrane);GO:0030424(axon);GO:0005887(integral component of plasma membrane);GO:2001180(negative regulation of interleukin-10 secretion);GO:2000666(negative regulation of interleukin-13 secretion);GO:2000663(negative regulation of interleukin-5 secretion);GO:0097252(oligodendrocyte apoptotic process);GO:0071356(cellular response to tumor necrosis factor);G…	04060(Cytokine-cytokine receptor interaction)	NA	NA	TNF receptor superfamily member 21 [Source:HGNC Symbol;Acc:HGNC:13469]	45.7367	22.6089	57.4109	10.0571	10.0297	22.2777	19.887	19.3159	18.7812	7.51859	9.80404	7.40137	6.16408	5.70524	6.33251	8.41199	7.59453
51567	0	chr33	-	296754	300101	ENSGALT00000051478	8	1085	MSTRG.20498	ASIC1	GO:0045202(synapse);GO:0005887(integral component of plasma membrane);GO:0005886(plasma membrane);GO:0005794(Golgi apparatus);GO:0071467(cellular response to pH);GO:0070207(protein homotrimerization);GO:0070588(calcium ion transmembrane transport);GO:0050915(sensory perception of sour taste);GO:0046929(negative regulation of neurotransmitter secretion);GO:0042391(regulation of membrane potential)…	NA	NA	NA	Acid-sensing ion channel 1 [Source:UniProtKB/Swiss-Prot;Acc:Q1XA76]	673.555	724.664	872.71	824.278	828.128	544.924	613.928	751.283	864.256	29.6396	19.5811	30.9343	1.74267	1.64985	0.300981	0.799884	0.551686
51955	0	chr33	+	1630835	1633512	ENSGALT00000090184	9	1557	MSTRG.20634	ATP5B	GO:0009986(cell surface);GO:0043209(myelin sheath);GO:0006754(ATP biosynthetic process);GO:0016887(ATPase activity);GO:0031966(mitochondrial membrane);GO:0015992(proton transport);GO:0001525(angiogenesis);GO:0005886(plasma membrane);GO:0005739(mitochondrion);GO:0005634(nucleus);GO:0016020(membrane);GO:0051453(regulation of intracellular pH);GO:0070062(extracellular exosome);GO:0005743(mitochondri…	00190(Oxidative phosphorylation)	NA	NA	ATP synthase, H+ transporting, mitochondrial F1 complex, beta polypeptide [Source:HGNC Symbol;Acc:HGNC:830]	18.1957	40.3446	26.2417	35.9654	0.024912	42.1272	33.7482	0.029231	4.66609	28.6313	0.093093	0.083248	0.045676	0.359377	0.029999	0.631036	1.21941
52222	0	chr4	+	1877762	1893401	ENSGALT00000007663	33	3714	MSTRG.20743	PHKA1	GO:0005977(glycogen metabolic process);GO:0005516(calmodulin binding);GO:0005975(carbohydrate metabolic process);GO:0005964(phosphorylase kinase complex);GO:0004689(phosphorylase kinase activity);GO:0006468(protein phosphorylation);GO:0005886(plasma membrane);GO:0003824(catalytic activity);GO:0016020(membrane)	04020(Calcium signaling pathway);04910(Insulin signaling pathway)	NA	NA	phosphorylase kinase regulatory subunit alpha 1 [Source:HGNC Symbol;Acc:HGNC:8925]	20.7641	20.6753	9.82668	37.3195	44.1762	22.2351	31.0247	20.1547	46.7349	0	0	21.3391	1.76659	2.35152	0	4.68211	2.97607
52223	0	chr4	+	1877762	1893401	ENSGALT00000072309	32	3675	MSTRG.20743	PHKA1	GO:0005977(glycogen metabolic process);GO:0005516(calmodulin binding);GO:0005975(carbohydrate metabolic process);GO:0005964(phosphorylase kinase complex);GO:0004689(phosphorylase kinase activity);GO:0006468(protein phosphorylation);GO:0005886(plasma membrane);GO:0003824(catalytic activity);GO:0016020(membrane)	04020(Calcium signaling pathway);04910(Insulin signaling pathway)	NA	NA	phosphorylase kinase regulatory subunit alpha 1 [Source:HGNC Symbol;Acc:HGNC:8925]	17.459	18.3699	9.69802	20.0628	21.0838	12.5561	10.6096	18.023	22.8585	20.826	2.31105	5.08756	4.11802	0	2.42834	0	1.13317
52225	0	chr4	+	1879295	1893401	ENSGALT00000057262	30	3309	MSTRG.20743	PHKA1	GO:0005977(glycogen metabolic process);GO:0005516(calmodulin binding);GO:0005975(carbohydrate metabolic process);GO:0005964(phosphorylase kinase complex);GO:0004689(phosphorylase kinase activity);GO:0006468(protein phosphorylation);GO:0005886(plasma membrane);GO:0003824(catalytic activity);GO:0016020(membrane)	04020(Calcium signaling pathway);04910(Insulin signaling pathway)	K07190	NA	phosphorylase kinase regulatory subunit alpha 1 [Source:HGNC Symbol;Acc:HGNC:8925]	12.7546	9.80283	5.16194	27.0118	14.4057	22.6018	10.127	18.9883	17.6964	2.68862	3.38194	2.27847	0.06534	0.186972	0.120061	0.187596	0.769627
52338	0	chr4	+	2184257	2188075	ENSGALT00000071524	5	806	MSTRG.20776	FUNDC2	GO:0005634(nucleus);GO:0005739(mitochondrion)	NA	NA	NA	FUN14 domain containing 2 [Source:HGNC Symbol;Acc:HGNC:24925]	59.6407	58.929	53.1503	43.166	46.3191	43.0378	25.3815	26.6143	36.2367	17.1859	17.0691	17.1363	16.3894	16.7355	15.1795	15.4334	18.4086
52365	0	chr4	-	2232118	2260037	ENSGALT00000008777	39	5583	MSTRG.20780	ENSGALG00000005464	GO:0005669(transcription factor TFIID complex);GO:0001129(RNA polymerase II transcription factor activity, TBP-class protein binding, involved in preinitiation complex assembly);GO:0017025(TBP-class protein binding);GO:0016573(histone acetylation);GO:0051123(RNA polymerase II transcriptional preinitiation complex assembly);GO:0004402(histone acetyltransferase activity);GO:0001075(transcription fa…	NA	NA	NA	NA	15.1519	15.7712	14.0633	15.978	16.9036	14.9134	19.0069	18.5691	19.0273	7.82687	11.8802	11.8632	5.36113	5.09658	7.94189	6.79347	6.28893
52678	0	chr4	-	4778637	4829528	ENSGALT00000010519	5	1104	MSTRG.20900	FGF13	GO:0043005(neuron projection);GO:0030426(growth cone);GO:0030425(dendrite);GO:0030424(axon);GO:0030175(filopodium);GO:0016328(lateral plasma membrane);GO:0014704(intercalated disc);GO:0005886(plasma membrane);GO:0005874(microtubule);GO:0005829(cytosol);GO:0005737(cytoplasm);GO:0005634(nucleus);GO:0098909(regulation of cardiac muscle cell action potential involved in regulation of contraction);GO:…	04010(MAPK signaling pathway);04810(Regulation of actin cytoskeleton)	NA	NA	fibroblast growth factor 13 [Source:HGNC Symbol;Acc:HGNC:3670]	11.1773	8.60973	4.82949	17.5291	9.80295	7.81454	6.48423	8.70702	6.36848	2.75944	7.94731	4.23558	2.33007	1.20471	0.082625	0.21263	0.173429
53155	0	chr4	+	12987162	13001599	ENSGALT00000071530	11	1767	MSTRG.21128	ENSGALG00000007936	GO:0004618(phosphoglycerate kinase activity);GO:0006096(glycolytic process);GO:0005623(cell);GO:0016740(transferase activity);GO:0005524(ATP binding);GO:0016310(phosphorylation);GO:0016301(kinase activity)	01200(Carbon metabolism);01230(Biosynthesis of amino acids);00010(Glycolysis / Gluconeogenesis)	NA	NA	NA	5.6992	17.9664	30.2015	27.3927	37.5068	38.0866	13.5593	26.452	84.7571	3.85055	1.61291	2.22638	1.09142	1.76695	1.25427	1.02982	0
53157	0	chr4	+	12990329	13001599	ENSGALT00000012893	11	1805	MSTRG.21128	ENSGALG00000007936	GO:0004618(phosphoglycerate kinase activity);GO:0006096(glycolytic process);GO:0005623(cell);GO:0016740(transferase activity);GO:0005524(ATP binding);GO:0016310(phosphorylation);GO:0016301(kinase activity)	01200(Carbon metabolism);01230(Biosynthesis of amino acids);00010(Glycolysis / Gluconeogenesis)	NA	NA	NA	1336.2	1288.88	931.087	1632.65	1573.75	985.915	1155.67	1255.94	1550.53	60.8914	40.5682	34.8807	16.2852	15.5306	17.0336	26.6105	22.2559
53158	0	chr4	+	12990419	13001596	ENSGALT00000084875	11	1707	MSTRG.21128	ENSGALG00000007936	GO:0004618(phosphoglycerate kinase activity);GO:0006096(glycolytic process);GO:0005623(cell);GO:0016740(transferase activity);GO:0005524(ATP binding);GO:0016310(phosphorylation);GO:0016301(kinase activity)	01200(Carbon metabolism);01230(Biosynthesis of amino acids);00010(Glycolysis / Gluconeogenesis)	NA	NA	NA	13.1354	14.3926	12.5148	19.1083	14.087	8.57272	11.9211	10.7941	13.2182	2.003	0.8976	0.257243	0.008181	0.772876	0.100418	0.000356	0.112582
53159	0	chr4	+	12993136	13001599	ENSGALT00000090121	8	1426	MSTRG.21128	ENSGALG00000007936	GO:0004618(phosphoglycerate kinase activity);GO:0006096(glycolytic process);GO:0005623(cell);GO:0016740(transferase activity);GO:0005524(ATP binding);GO:0016310(phosphorylation);GO:0016301(kinase activity)	01200(Carbon metabolism);01230(Biosynthesis of amino acids);00010(Glycolysis / Gluconeogenesis)	NA	NA	NA	143.34	277.482	191.13	126.063	295.005	180.115	250.72	297.788	466.605	9.08256	12.4409	4.24587	4.34469	6.72754	0.696192	2.22948	0.331648
53160	0	chr4	+	12995249	13001599	ENSGALT00000085037	7	1227	MSTRG.21128	ENSGALG00000007936	GO:0004618(phosphoglycerate kinase activity);GO:0006096(glycolytic process);GO:0005623(cell);GO:0016740(transferase activity);GO:0005524(ATP binding);GO:0016310(phosphorylation);GO:0016301(kinase activity)	01200(Carbon metabolism);01230(Biosynthesis of amino acids);00010(Glycolysis / Gluconeogenesis)	K00927	EC:2.7.2.3	NA	157.051	105.209	60.8629	226.817	100.685	89.5395	80.2827	110.043	155.775	6.2799	6.19769	2.90784	3.14909	1.76058	0.320086	1.02355	1.13804
53231	0	chr4	-	13750565	13788735	ENSGALT00000013109	7	3491	MSTRG.21153	TMEM164	GO:0016021(integral component of membrane);GO:0016020(membrane)	NA	NA	NA	transmembrane protein 164 [Source:HGNC Symbol;Acc:HGNC:26217]	14.3952	21.2622	16.5613	1.48846	3.5436	6.48306	3.99119	2.78251	6.11364	3.08035	0.91577	2.247	1.54372	1.43543	3.64462	4.92893	2.95863
53395	0	chr4	-	16506356	16513518	ENSGALT00000039082	9	2065	MSTRG.21214	ATP1B4	GO:0005890(sodium:potassium-exchanging ATPase complex);GO:0006814(sodium ion transport);GO:0015992(proton transport);GO:0006811(ion transport);GO:0006813(potassium ion transport);GO:0006810(transport);GO:0016021(integral component of membrane);GO:0016020(membrane);GO:0005634(nucleus);GO:0006355(regulation of transcription, DNA-templated);GO:0005637(nuclear inner membrane)	04260(Cardiac muscle contraction);04261(Adrenergic signaling in cardiomyocytes)	NA	NA	ATPase Na+/K+ transporting family member beta 4 [Source:HGNC Symbol;Acc:HGNC:808]	44.8597	11.6937	9.10839	75.4162	14.7699	5.09847	31.6719	40.3887	28.8774	5.6441	10.2209	12.7518	12.307	7.44652	2.07955	4.09367	2.7409
53404	0	chr4	+	16515157	16536825	ENSGALT00000014012	9	972	MSTRG.21215	TMEM255A	GO:0016021(integral component of membrane);GO:0016020(membrane)	NA	NA	NA	transmembrane protein 255A [Source:HGNC Symbol;Acc:HGNC:26086]	19.9587	15.8173	7.52658	14.7301	17.1628	8.03034	18.8539	25.1018	17.4857	3.88166	10.5137	0.588926	1.93037	0.158497	0.497394	0	0.144514
53441	0	chr4	-	16609403	16617421	ENSGALT00000076460	6	1925	MSTRG.21225	UBE2A	GO:0009411(response to UV);GO:0051865(protein autoubiquitination);GO:0008284(positive regulation of cell proliferation);GO:0070936(protein K48-linked ubiquitination);GO:0004842(ubiquitin-protein transferase activity);GO:0006281(DNA repair);GO:0031625(ubiquitin protein ligase binding);GO:0033522(histone H2A ubiquitination);GO:0061631(ubiquitin conjugating enzyme activity);GO:0001701(in utero embry…	04120(Ubiquitin mediated proteolysis)	NA	NA	ubiquitin conjugating enzyme E2 A [Source:HGNC Symbol;Acc:HGNC:12472]	10.3995	10.5454	9.41397	9.68592	8.53103	9.68135	6.25501	6.44146	8.46304	6.58733	6.71202	5.98955	3.71292	3.58405	5.4603	7.083	5.19028
53467	0	chr4	-	16763542	16777172	ENSGALT00000014392	12	2291	MSTRG.21235	LONRF3	GO:0032436(positive regulation of proteasomal ubiquitin-dependent protein catabolic process);GO:0000209(protein polyubiquitination);GO:0031624(ubiquitin conjugating enzyme binding);GO:0061630(ubiquitin protein ligase activity);GO:0005622(intracellular);GO:0046872(metal ion binding)	NA	NA	NA	LON peptidase N-terminal domain and ring finger 3 [Source:HGNC Symbol;Acc:HGNC:21152]	17.8718	12.2506	12.5893	5.8061	6.1771	9.76994	6.51489	5.79912	6.24671	5.00564	3.6578	4.11743	0.48521	0.734426	2.22108	2.31476	2.20891
53528	0	chr4	+	17438835	17470341	ENSGALT00000014716	21	3381	MSTRG.21280	TBC1D8B	GO:0012505(endomembrane system);GO:0090630(activation of GTPase activity);GO:0031338(regulation of vesicle fusion);GO:0017137(Rab GTPase binding);GO:0005096(GTPase activator activity);GO:0006886(intracellular protein transport);GO:0005622(intracellular);GO:0005509(calcium ion binding)	NA	NA	NA	TBC1 domain family member 8B [Source:HGNC Symbol;Acc:HGNC:24715]	8.22528	9.92494	8.02269	7.16286	8.8698	5.69483	7.37384	7.9321	7.98836	3.90422	4.13304	4.99034	3.28423	3.28334	3.48699	4.05692	3.13055
53560	0	chr4	-	17775905	17808725	ENSGALT00000058208	16	2007	MSTRG.21298	MTMR1	GO:0005737(cytoplasm);GO:0005886(plasma membrane);GO:0004438(phosphatidylinositol-3-phosphatase activity);GO:0052629(phosphatidylinositol-3,5-bisphosphate 3-phosphatase activity);GO:0046856(phosphatidylinositol dephosphorylation);GO:0016311(dephosphorylation);GO:0035335(peptidyl-tyrosine dephosphorylation);GO:0016791(phosphatase activity);GO:0004725(protein tyrosine phosphatase activity)	00562(Inositol phosphate metabolism);04070(Phosphatidylinositol signaling system)	NA	NA	myotubularin related protein 1 [Source:HGNC Symbol;Acc:HGNC:7449]	4.28893	5.11001	3.6264	4.48223	4.16296	5.24577	4.26717	1.44022	1.14923	1.05396	2.77289	2.38445	2.15305	1.45626	0.74979	1.0177	0.478307
54014	0	chr4	+	29430980	29433345	ENSGALT00000053885	2	1666	MSTRG.21484	NOCT	NA	NA	NA	NA	nocturnin [Source:RefSeq peptide;Acc:NP_001009928]	7.64384	3.69534	6.19249	0.602591	1.17555	0.935919	2.36711	2.32489	2.36934	0.684679	0	0.626027	0.189246	0	0.004128	0.573497	0.429461
54584	0	chr4	-	35356333	35418165	ENSGALT00000060535	16	1958	MSTRG.21739	FAM13A	GO:0007165(signal transduction)	NA	NA	NA	family with sequence similarity 13 member A [Source:HGNC Symbol;Acc:HGNC:19367]	25.1368	11.4035	18.4912	0.674189	0.083649	0.625095	0.483601	1.8897	1.4936	1.04152	0	0	1.00337	1.21157	0.125558	0	0.567457
54585	0	chr4	-	35356333	35418165	ENSGALT00000064524	18	2183	MSTRG.21739	FAM13A	GO:0007165(signal transduction)	NA	NA	NA	family with sequence similarity 13 member A [Source:HGNC Symbol;Acc:HGNC:19367]	32.8449	9.41782	12.197	0.545089	1.73393	1.01696	2.49679	3.02503	1.09535	1.13483	1.18655	0.688036	0.689451	2.33232	0.12911	0.211651	0.338335
54658	0	chr4	-	37989121	37992417	ENSGALT00000065377	6	525	MSTRG.21762	RPL34	GO:0045296(cadherin binding);GO:0070062(extracellular exosome);GO:0005739(mitochondrion);GO:0022625(cytosolic large ribosomal subunit)	03010(Ribosome)	NA	NA	ribosomal protein L34 [Source:HGNC Symbol;Acc:HGNC:10340]	6.27814	10.0414	5.69587	2.80023	1.29761	5.5179	4.79969	2.9877	8.87356	3.68276	0.129561	3.28394	1.27962	0.857502	1.85342	1.0008	0.758691
54663	0	chr4	-	38219463	38236292	ENSGALT00000086174	8	1247	MSTRG.21764	HADH	GO:0005743(mitochondrial inner membrane);GO:0005739(mitochondrion);GO:0005737(cytoplasm);GO:0006631(fatty acid metabolic process);GO:0005654(nucleoplasm);GO:0003857(3-hydroxyacyl-CoA dehydrogenase activity);GO:0070403(NAD+ binding);GO:0016491(oxidoreductase activity);GO:0055114(oxidation-reduction process)	01212(Fatty acid metabolism);00650(Butanoate metabolism);00062(Fatty acid elongation);00071(Fatty acid degradation);00280(Valine, leucine and isoleucine degradation);00310(Lysine degradation);00380(Tryptophan metabolism)	K00022	EC:1.1.1.35	hydroxyacyl-CoA dehydrogenase [Source:HGNC Symbol;Acc:HGNC:4799]	19.0553	23.1064	19.7782	25.674	23.0236	18.1353	22.5055	19.5836	16.9008	15.425	16.9724	15.1397	14.8559	9.61397	10.9248	6.37594	6.34837
54664	0	chr4	-	38219463	38236405	ENSGALT00000025976	8	1360	MSTRG.21764	HADH	GO:0005743(mitochondrial inner membrane);GO:0005739(mitochondrion);GO:0005737(cytoplasm);GO:0006631(fatty acid metabolic process);GO:0005654(nucleoplasm);GO:0003857(3-hydroxyacyl-CoA dehydrogenase activity);GO:0070403(NAD+ binding);GO:0016491(oxidoreductase activity);GO:0055114(oxidation-reduction process)	01212(Fatty acid metabolism);00650(Butanoate metabolism);00062(Fatty acid elongation);00071(Fatty acid degradation);00280(Valine, leucine and isoleucine degradation);00310(Lysine degradation);00380(Tryptophan metabolism)	NA	NA	hydroxyacyl-CoA dehydrogenase [Source:HGNC Symbol;Acc:HGNC:4799]	17.9571	21.7571	18.6968	24.4162	21.749	17.3696	21.3358	18.4988	16.1185	14.838	15.5667	13.9453	2.27012	9.25228	10.5159	6.03158	5.82289
54752	0	chr4	+	39020156	39055350	ENSGALT00000017222	12	1092	MSTRG.21820	PPA2	GO:0070062(extracellular exosome);GO:0005739(mitochondrion);GO:0051881(regulation of mitochondrial membrane potential);GO:0006796(phosphate-containing compound metabolic process);GO:0004722(protein serine/threonine phosphatase activity);GO:0004427(inorganic diphosphatase activity);GO:0006470(protein dephosphorylation);GO:0000287(magnesium ion binding);GO:0005737(cytoplasm)	NA	NA	NA	pyrophosphatase (inorganic) 2 [Source:HGNC Symbol;Acc:HGNC:28883]	18.0423	25.2085	13.3441	10.6501	16.3114	14.9289	18.3044	17.6184	14.5651	13.4344	11.6886	12.4063	5.02516	6.4775	5.18356	6.72853	6.10794
54845	0	chr4	+	39801172	39841970	ENSGALT00000075597	9	1736	MSTRG.21861	IRF2	GO:0008283(cell proliferation);GO:0003700(transcription factor activity, sequence-specific DNA binding);GO:0006355(regulation of transcription, DNA-templated);GO:0006351(transcription, DNA-templated);GO:0006366(transcription from RNA polymerase II promoter);GO:0005634(nucleus);GO:0003677(DNA binding);GO:0000977(RNA polymerase II regulatory region sequence-specific DNA binding);GO:0001228(transcri…	NA	NA	NA	interferon regulatory factor 2 [Source:HGNC Symbol;Acc:HGNC:6117]	6.34127	6.53054	4.76877	4.73661	5.75762	4.58561	6.76838	5.11245	4.28297	2.40048	1.91191	2.88145	1.3696	1.31764	0.225498	0.878798	0.574484
56286	0	chr4	-	60690568	60796629	ENSGALT00000079486	13	1515	MSTRG.22500	PPP3CA	GO:0005634(nucleus);GO:0045944(positive regulation of transcription from RNA polymerase II promoter);GO:0035690(cellular response to drug);GO:0019899(enzyme binding);GO:0008144(drug binding);GO:0005516(calmodulin binding);GO:0006606(protein import into nucleus);GO:0046983(protein dimerization activity);GO:0005654(nucleoplasm);GO:0005829(cytosol);GO:0005739(mitochondrion);GO:0030018(Z disc);GO:001…	04010(MAPK signaling pathway);04310(Wnt signaling pathway);04370(VEGF signaling pathway);04020(Calcium signaling pathway);04114(Oocyte meiosis);04218(Cellular senescence)	K04348	EC:3.1.3.16	protein phosphatase 3 catalytic subunit alpha [Source:HGNC Symbol;Acc:HGNC:9314]	2.49687	2.92695	0.893685	7.14476	1.82536	0.002217	1.93043	0.000897	0.003977	0.195153	2.4857	0.01855	0.135243	0.002389	0.021446	0.022583	0.026627
56643	0	chr4	+	66354071	66366747	ENSGALT00000022602	4	483	MSTRG.22690	ENSGALG00000013946	GO:0006904(vesicle docking involved in exocytosis);GO:0016192(vesicle-mediated transport)	NA	NA	NA	NA	2.05492	1.58358	1.84583	1.93763	0.267197	3.14545	0.923275	2.06641	1.43894	0.122001	2.58207	0.044028	0.048174	0.328946	0.047987	0.056909	0
56714	0	chr4	+	66775441	66864719	ENSGALT00000022828	60	9039	MSTRG.22717	FRYL	GO:0030427(site of polarized growth);GO:0090527(actin filament reorganization);GO:0005938(cell cortex);GO:0000902(cell morphogenesis);GO:0031175(neuron projection development)	NA	NA	NA	FRY like transcription coactivator [Source:HGNC Symbol;Acc:HGNC:29127]	8.04267	3.69036	4.46469	3.88886	2.17665	1.33969	3.19296	1.00071	4.40397	1.55969	0.861305	2.64727	0.063144	0.651331	0.658778	0.385389	1.18333
57817	0	chr4	-	86188548	86192533	ENSGALT00000025484	6	1092	MSTRG.23232	ENSGALG00000015805	GO:0007034(vacuolar transport);GO:0005622(intracellular)	04144(Endocytosis);04217(Necroptosis)	K12193	NA	NA	13.0283	13.2935	10.6468	13.1784	15.4131	11.3699	11.9637	12.0557	10.0446	7.53159	10.223	8.15521	4.73678	4.8954	5.48529	6.39285	5.92545
58479	0	chr5	+	1570918	1572157	ENSGALT00000085145	2	314	MSTRG.23510	ENSGALG00000045362	NA	NA	NA	NA	NA	33.0214	46.0027	44.6035	45.0362	40.2985	0.157146	35.6444	0.132492	0.049196	19.0599	31.7465	25.0448	2.60329	3.35508	0.427495	0.376454	0.339995
59299	0	chr5	+	12555480	12561388	ENSGALT00000039415	8	1717	MSTRG.23804	ENSGALG00000006300	GO:0019752(carboxylic acid metabolic process);GO:0004459(L-lactate dehydrogenase activity);GO:0005975(carbohydrate metabolic process);GO:0016616(oxidoreductase activity, acting on the CH-OH group of donors, NAD or NADP as acceptor);GO:0016491(oxidoreductase activity);GO:0055114(oxidation-reduction process);GO:0003824(catalytic activity);GO:0005737(cytoplasm)	00010(Glycolysis / Gluconeogenesis);00620(Pyruvate metabolism);00640(Propanoate metabolism);00270(Cysteine and methionine metabolism)	NA	NA	NA	2622.56	1584.45	1073.43	7637.54	4824.09	2589.03	4357.44	1967.51	5141.87	380.491	310.039	303.041	14.8536	19.2456	21.617	21.6009	23.7208
59360	0	chr5	-	13449733	13471369	ENSGALT00000069634	9	1041	MSTRG.23818	KCNQ1	GO:0045121(membrane raft);GO:0005546(phosphatidylinositol-4,5-bisphosphate binding);GO:0005783(endoplasmic reticulum);GO:0005737(cytoplasm);GO:0005886(plasma membrane);GO:0016323(basolateral plasma membrane);GO:0006349(regulation of gene expression by genetic imprinting);GO:0044325(ion channel binding);GO:0060307(regulation of ventricular cardiac muscle cell membrane repolarization);GO:0086005(ve…	NA	NA	NA	potassium voltage-gated channel subfamily Q member 1 [Source:HGNC Symbol;Acc:HGNC:6294]	2.08547	5.1631	1.81383	1.90463	1.48313	2.44813	2.44674	2.23318	2.72327	0.961754	1.11389	1.87809	0.916965	0.635454	0.884641	0.66071	0.432785
59407	0	chr5	-	14053799	14092883	ENSGALT00000010632	11	2054	MSTRG.23840	LSP1	GO:0070062(extracellular exosome);GO:0016020(membrane);GO:0005886(plasma membrane);GO:0006952(defense response);GO:0006935(chemotaxis);GO:0004871(signal transducer activity);GO:0007165(signal transduction)	NA	NA	NA	lymphocyte-specific protein 1 [Source:HGNC Symbol;Acc:HGNC:6707]	3.44561	2.84353	3.63639	3.35115	1.52068	12.8974	1.8683	2.36251	0	0	0.973255	0	0	2.87966	0.295591	0	0.017166
59415	0	chr5	-	14094429	14098832	ENSGALT00000010641	7	859	MSTRG.23825	TNNI2	GO:0005861(troponin complex);GO:0005634(nucleus);GO:0045893(positive regulation of transcription, DNA-templated);GO:0003009(skeletal muscle contraction);GO:0031014(troponin T binding);GO:0003779(actin binding)	NA	NA	NA	Gallus gallus troponin I type 2 (skeletal, fast) (TNNI2), mRNA. [Source:RefSeq mRNA;Acc:NM_205417]	3089.16	4123.81	3459.05	5051.08	5097.81	3634.26	3349.48	4538.58	4797.55	1155.85	1378.85	1313.17	654.971	37.6124	152.59	237.066	177.99
59529	0	chr5	+	15845877	15849344	ENSGALT00000039023	10	1999	MSTRG.23883	IRF7	GO:0003700(transcription factor activity, sequence-specific DNA binding);GO:0006355(regulation of transcription, DNA-templated);GO:0006351(transcription, DNA-templated);GO:0005634(nucleus);GO:0003677(DNA binding);GO:0000979(RNA polymerase II core promoter sequence-specific DNA binding);GO:0000982(transcription factor activity, RNA polymerase II core promoter proximal region sequence-specific bind…	04620(Toll-like receptor signaling pathway);04621(NOD-like receptor signaling pathway);04622(RIG-I-like receptor signaling pathway);04623(Cytosolic DNA-sensing pathway);05164(Influenza A);05168(Herpes simplex infection)	K09447	NA	interferon regulatory factor 7 [Source:HGNC Symbol;Acc:HGNC:6122]	2.70278	1.96997	2.72784	1.34799	1.66149	7.68828	2.12844	2.174	1.83047	1.59174	1.22141	1.18389	0.705446	0.570221	1.26175	1.12599	0.876142
60141	0	chr5	+	23201961	23210494	ENSGALT00000061193	17	1623	MSTRG.24090	ARFGAP2	GO:0005096(GTPase activator activity);GO:0043547(positive regulation of GTPase activity);GO:0046872(metal ion binding);GO:0005829(cytosol);GO:0005886(plasma membrane);GO:0005794(Golgi apparatus)	04144(Endocytosis)	K12493	NA	ADP ribosylation factor GTPase activating protein 2 [Source:HGNC Symbol;Acc:HGNC:13504]	11.1366	11.7686	13.0708	9.72203	12.1615	12.9917	11.9217	13.425	8.91911	2.91179	2.13925	2.10801	1.90039	2.10756	1.08205	0	0
60381	0	chr5	+	25623609	25643130	ENSGALT00000014708	24	4445	MSTRG.24165	GANC	GO:0004553(hydrolase activity, hydrolyzing O-glycosyl compounds);GO:0005975(carbohydrate metabolic process);GO:0016798(hydrolase activity, acting on glycosyl bonds);GO:0030246(carbohydrate binding);GO:0016787(hydrolase activity);GO:0008152(metabolic process);GO:0003824(catalytic activity)	00052(Galactose metabolism);00500(Starch and sucrose metabolism)	K12317	EC:3.2.1.20	glucosidase alpha, neutral C [Source:HGNC Symbol;Acc:HGNC:4139]	21.1412	20.9161	13.4589	20.9191	27.3369	14.6986	13.3991	18.1024	14.7691	5.38193	3.94406	2.5432	1.87791	1.82712	1.7379	0.456682	2.77576
60387	0	chr5	+	25645574	25669584	ENSGALT00000073343	24	3451	MSTRG.24166	CAPN3	GO:0032947(protein complex scaffold activity);GO:0045661(regulation of myoblast differentiation);GO:0071277(cellular response to calcium ion);GO:0045893(positive regulation of transcription, DNA-templated);GO:0045892(negative regulation of transcription, DNA-templated);GO:0008307(structural constituent of muscle);GO:0005509(calcium ion binding);GO:0043066(negative regulation of apoptotic process)…	NA	NA	NA	calpain 3 [Source:HGNC Symbol;Acc:HGNC:1480]	84.4038	35.5705	33.3192	47.5273	100.203	38.4924	50.2879	44.9376	34.0764	35.1634	30.0666	33.9415	12.3832	12.9673	1.60742	1.01499	0.524278
60435	0	chr5	+	25967888	25978284	ENSGALT00000014960	4	1901	MSTRG.24203	ENSGALG00000009185	GO:0007166(cell surface receptor signaling pathway);GO:0005887(integral component of plasma membrane);GO:0007601(visual perception);GO:0016021(integral component of membrane);GO:0016020(membrane)	NA	NA	NA	NA	0.716645	1.29851	0.557463	1.0534	1.69903	0.965308	0.842087	0.783095	0.820477	0.557409	0.8305	0.406542	0.152831	0.181703	0.023631	0.095731	0.127258
60506	0	chr5	+	26425311	26448293	ENSGALT00000015206	12	4932	MSTRG.24216	ZFYVE1	GO:0097629(extrinsic component of omegasome membrane);GO:0048471(perinuclear region of cytoplasm);GO:0044233(ER-mitochondrion membrane contact site);GO:0016020(membrane);GO:0005795(Golgi stack);GO:0005783(endoplasmic reticulum);GO:0000407(pre-autophagosomal structure);GO:0005776(autophagosome);GO:0016236(macroautophagy);GO:0010923(negative regulation of phosphatase activity);GO:0009267(cellular r…	04140(Autophagy - animal)	K17603	NA	zinc finger FYVE-type containing 1 [Source:HGNC Symbol;Acc:HGNC:13180]	9.81197	10.676	10.1826	6.56055	7.14592	8.12292	8.28132	10.1034	10.7151	5.04223	4.91232	4.0317	2.51241	2.59754	1.1448	1.97873	3.33209
61917	0	chr5	-	45442600	45460603	ENSGALT00000017687	9	1938	MSTRG.24839	ASB2	GO:0031466(Cul5-RING ubiquitin ligase complex);GO:0045445(myoblast differentiation);GO:0042787(protein ubiquitination involved in ubiquitin-dependent protein catabolic process);GO:0035914(skeletal muscle cell differentiation);GO:0000209(protein polyubiquitination);GO:0061630(ubiquitin protein ligase activity);GO:0016567(protein ubiquitination);GO:0035556(intracellular signal transduction);GO:0000…	NA	NA	NA	ankyrin repeat and SOCS box containing 2 [Source:HGNC Symbol;Acc:HGNC:16012]	491.501	477.367	85.2713	176.681	171.126	30.5051	116.145	306.983	364.825	29.5551	20.4831	37.4131	14.0612	18.4083	4.32411	0	1.35112
61988	0	chr5	-	46490362	46531868	ENSGALT00000066952	42	6234	MSTRG.24864	ATG2B	NA	04140(Autophagy - animal);04136(Autophagy - other eukaryotes)	NA	NA	autophagy related 2B [Source:HGNC Symbol;Acc:HGNC:20187]	21.9404	19.2677	16.0206	13.3628	15.8129	16.4402	17.5457	20.2191	16.3735	11.5151	9.80841	10.3166	6.88999	6.15566	8.16949	7.99361	10.5052
62064	0	chr5	+	48489689	48555741	ENSGALT00000018280	14	1956	MSTRG.24892	EVL	GO:0030027(lamellipodium);GO:0016020(membrane);GO:0005925(focal adhesion);GO:0005737(cytoplasm);GO:1900028(negative regulation of ruffle assembly);GO:0051496(positive regulation of stress fiber assembly);GO:0030838(positive regulation of actin filament polymerization);GO:0010633(negative regulation of epithelial cell migration);GO:0008154(actin polymerization or depolymerization);GO:0017124(SH3 d…	NA	NA	NA	Enah/Vasp-like [Source:HGNC Symbol;Acc:HGNC:20234]	3.08114	3.05934	2.45569	2.62766	1.91059	9.59732	2.7978	2.10765	2.01534	1.52847	1.09166	1.79822	0.037979	3.04857	0.627193	0.960848	1.16412
62162	0	chr5	-	49569278	49571912	ENSGALT00000081964	4	805	MSTRG.24960	HSP90AA1	GO:0005634(nucleus);GO:0043209(myelin sheath);GO:0042802(identical protein binding);GO:0016887(ATPase activity);GO:0050821(protein stabilization);GO:0003723(RNA binding);GO:0005524(ATP binding);GO:0016020(membrane);GO:0005737(cytoplasm);GO:0097718(disordered domain specific binding);GO:0070062(extracellular exosome);GO:0005829(cytosol);GO:0051973(positive regulation of telomerase activity);GO:004…	04141(Protein processing in endoplasmic reticulum);04217(Necroptosis);04621(NOD-like receptor signaling pathway);04914(Progesterone-mediated oocyte maturation)	K04079	NA	heat shock protein 90 alpha family class A member 1 [Source:HGNC Symbol;Acc:HGNC:5253]	179.298	76.0987	242.01	99.2192	37.4491	75.8113	62.3125	31.4665	9.87462	17.8394	43.5988	7.33541	9.41533	5.03808	9.18398	2.80201	16.5357
62312	0	chr5	-	50573878	50636169	ENSGALT00000081897	18	3444	MSTRG.25005	PPP1R13B	GO:0072332(intrinsic apoptotic signaling pathway by p53 class mediator);GO:0005634(nucleus);GO:0005654(nucleoplasm);GO:0005829(cytosol);GO:0005886(plasma membrane);GO:0045786(negative regulation of cell cycle);GO:0008134(transcription factor binding);GO:0006915(apoptotic process)	NA	NA	NA	protein phosphatase 1 regulatory subunit 13B [Source:HGNC Symbol;Acc:HGNC:14950]	2.21102	1.96655	1.33435	2.15821	0.972707	2.63453	1.09549	2.36199	1.76325	1.37811	1.21707	0.665467	1.33195	0.051422	0.089878	0.294312	0.554318
62337	0	chr5	+	51625809	51648726	ENSGALT00000018983	14	1335	MSTRG.25018	ADSSL1	GO:0005737(cytoplasm);GO:0046040(IMP metabolic process);GO:0044208('de novo' AMP biosynthetic process);GO:0006167(AMP biosynthetic process);GO:0006163(purine nucleotide metabolic process);GO:0004019(adenylosuccinate synthase activity);GO:0006164(purine nucleotide biosynthetic process);GO:0000287(magnesium ion binding);GO:0005525(GTP binding);GO:0016874(ligase activity);GO:0046872(metal ion bindin…	00230(Purine metabolism);00250(Alanine, aspartate and glutamate metabolism)	K01939	EC:6.3.4.4	adenylosuccinate synthase like 1 [Source:HGNC Symbol;Acc:HGNC:20093]	153.244	198.918	103.181	234.035	224.096	156.019	193.514	211.124	157.12	107.711	105.106	101.402	32.4855	36.355	13.3396	9.90572	8.4034
62596	0	chr5	-	54600940	54613644	ENSGALT00000019443	5	2077	MSTRG.25135	PPM1A	GO:0016020(membrane);GO:0005886(plasma membrane);GO:0005829(cytosol);GO:0005634(nucleus);GO:0071560(cellular response to transforming growth factor beta stimulus);GO:0046827(positive regulation of protein export from nucleus);GO:0045893(positive regulation of transcription, DNA-templated);GO:0043124(negative regulation of I-kappaB kinase/NF-kappaB signaling);GO:0043123(positive regulation of I-ka…	04010(MAPK signaling pathway)	K04457	EC:3.1.3.16	protein phosphatase, Mg2+/Mn2+ dependent 1A [Source:HGNC Symbol;Acc:HGNC:9275]	25.0712	13.0165	18.3849	13.3945	1.06825	10.6521	7.25235	7.84345	9.15054	12.585	2.65894	7.75125	4.26651	8.94502	3.16227	3.60005	3.63338
62752	0	chr5	+	56311818	56327604	ENSGALT00000019842	10	1479	MSTRG.25221	ATG14	GO:0097632(extrinsic component of pre-autophagosomal structure membrane);GO:0097629(extrinsic component of omegasome membrane);GO:0034045(pre-autophagosomal structure membrane);GO:0005776(autophagosome);GO:0043552(positive regulation of phosphatidylinositol 3-kinase activity);GO:0016240(autophagosome membrane docking);GO:0016236(macroautophagy);GO:0010608(posttranscriptional regulation of gene ex…	04140(Autophagy - animal)	K17889	NA	autophagy related 14 [Source:HGNC Symbol;Acc:HGNC:19962]	4.18329	4.0184	4.81727	2.9567	3.23943	3.3995	2.80353	3.53071	4.55154	1.56738	1.87247	1.3737	0.912852	0.651432	0.653558	0.613877	1.09406
63014	0	chr5	+	58983876	58994695	ENSGALT00000048207	5	2347	MSTRG.25311	KLHL28	GO:0031463(Cul3-RING ubiquitin ligase complex);GO:0004842(ubiquitin-protein transferase activity);GO:0016567(protein ubiquitination)	NA	NA	NA	kelch like family member 28 [Source:HGNC Symbol;Acc:HGNC:19741]	4.60006	4.61767	4.05103	2.35319	3.85695	3.88987	2.47065	3.57877	2.52535	2.86485	2.47784	1.97186	1.46818	1.27155	1.26892	1.2565	3.00447
63356	0	chr6	-	5116741	5142455	ENSGALT00000004154	12	1611	MSTRG.25506	ENSGALG00000002638	GO:0016021(integral component of membrane);GO:0016020(membrane)	01200(Carbon metabolism);01230(Biosynthesis of amino acids);00260(Glycine, serine and threonine metabolism);00290(Valine, leucine and isoleucine biosynthesis)	NA	NA	NA	38.9854	34.2769	29.7729	52.2047	48.5819	28.5256	43.829	46.9973	33.2705	20.7207	23.5116	26.2229	13.2772	12.8642	5.27707	4.99116	3.52114
63989	0	chr6	+	11185397	11213752	ENSGALT00000058801	15	5161	MSTRG.25777	P4HA1	GO:0031418(L-ascorbic acid binding);GO:0016702(oxidoreductase activity, acting on single donors with incorporation of molecular oxygen, incorporation of two atoms of oxygen);GO:0004656(procollagen-proline 4-dioxygenase activity);GO:0016705(oxidoreductase activity, acting on paired donors, with incorporation or reduction of molecular oxygen);GO:0019511(peptidyl-proline hydroxylation);GO:0005783(en…	00330(Arginine and proline metabolism)	NA	NA	prolyl 4-hydroxylase subunit alpha-1 isoform 4 precursor [Source:RefSeq peptide;Acc:NP_001185667]	2.41374	2.14742	1.97805	3.34014	1.47284	3.15702	0.504667	1.33085	1.49141	0.637667	0.674348	0.293549	0.232653	0.61287	0.236282	0.295413	0.501081
64328	0	chr6	+	14889658	14891768	ENSGALT00000054344	3	585	MSTRG.25902	ENSGALG00000005007	GO:0016311(dephosphorylation);GO:0035335(peptidyl-tyrosine dephosphorylation);GO:0006470(protein dephosphorylation);GO:0016791(phosphatase activity);GO:0008138(protein tyrosine/serine/threonine phosphatase activity);GO:0004725(protein tyrosine phosphatase activity)	NA	NA	NA	NA	10.8228	12.7518	7.39669	7.70912	9.15856	6.56464	2.90761	4.09511	3.59008	0.953889	0.962483	1.68286	0.545635	0.601573	0	0.856823	0
64339	0	chr6	+	14955839	14975346	ENSGALT00000008036	4	777	MSTRG.25905	DUPD1	GO:0016311(dephosphorylation);GO:0035335(peptidyl-tyrosine dephosphorylation);GO:0006470(protein dephosphorylation);GO:0016791(phosphatase activity);GO:0008138(protein tyrosine/serine/threonine phosphatase activity);GO:0004725(protein tyrosine phosphatase activity);GO:0042803(protein homodimerization activity);GO:0043234(protein complex)	NA	NA	NA	dual specificity phosphatase and pro isomerase domain containing 1 [Source:HGNC Symbol;Acc:HGNC:23481]	12.403	7.97125	8.6421	15.9539	16.1315	16.8521	16.6471	12.1055	16.3091	10.2506	8.97501	6.79653	1.76384	1.24943	1.5171	1.40959	1.31257
64431	0	chr6	+	16010360	16025442	ENSGALT00000008397	5	1367	MSTRG.25925	MYOZ1	GO:0015629(actin cytoskeleton);GO:0051373(FATZ binding);GO:0030018(Z disc);GO:0030239(myofibril assembly);GO:0031433(telethonin binding);GO:0003779(actin binding)	NA	NA	NA	myozenin 1 [Source:HGNC Symbol;Acc:HGNC:13752]	622.607	517.131	294.108	774.091	744.595	595.86	500.609	598.631	864.237	117.709	199.281	149.709	106.719	182.261	16.7889	24.7054	22.8016
64590	0	chr6	-	16983567	16994558	ENSGALT00000089476	11	1294	MSTRG.25952	CUEDC2	GO:0005654(nucleoplasm);GO:0005829(cytosol);GO:0031965(nuclear membrane);GO:0010936(negative regulation of macrophage cytokine production);GO:1900016(negative regulation of cytokine production involved in inflammatory response)	NA	NA	NA	CUE domain containing 2 [Source:HGNC Symbol;Acc:HGNC:28352]	1.61793	2.19859	1.8322	1.33417	0.470175	1.14584	0.539812	0.965461	2.97723	1.65201	0	0.606855	0.261621	0.204006	0.612563	0.1262	0.11124
64606	0	chr6	-	17408516	17416044	ENSGALT00000009141	8	1038	MSTRG.25970	HIF1AN	GO:0048471(perinuclear region of cytoplasm);GO:0005829(cytosol);GO:0005737(cytoplasm);GO:0005654(nucleoplasm);GO:0005634(nucleus);GO:0061428(negative regulation of transcription from RNA polymerase II promoter in response to hypoxia);GO:0055114(oxidation-reduction process);GO:0045746(negative regulation of Notch signaling pathway);GO:0045663(positive regulation of myoblast differentiation);GO:004…	NA	NA	NA	hypoxia inducible factor 1 alpha subunit inhibitor [Source:HGNC Symbol;Acc:HGNC:17113]	23.51	23.0338	24.0221	16.9135	19.5727	18.4322	10.1235	9.73928	13.3239	9.65557	9.08946	6.84112	3.28366	3.70919	6.22593	8.07817	3.48352
64779	0	chr6	-	19643927	19652608	ENSGALT00000010491	9	3202	MSTRG.26029	ANKRD1	GO:2000288(positive regulation of myoblast proliferation);GO:0071363(cellular response to growth factor stimulus);GO:0009791(post-embryonic development);GO:0014866(skeletal myofibril assembly);GO:0007519(skeletal muscle tissue development);GO:0051726(regulation of cell cycle);GO:0043066(negative regulation of apoptotic process);GO:0010629(negative regulation of gene expression);GO:0010628(positiv…	NA	NA	NA	ankyrin repeat domain 1 [Source:HGNC Symbol;Acc:HGNC:15819]	298.403	165.111	395.672	41.7052	26.0792	20.6283	16.3673	21.7807	9.34965	23.4821	3.24084	4.06241	0.470488	0.106902	0.124179	0	0.090757
64916	0	chr6	+	20741800	20794790	ENSGALT00000056288	25	3380	MSTRG.26083	IDE	GO:0009986(cell surface);GO:0004222(metalloendopeptidase activity);GO:0051260(protein homooligomerization);GO:0042277(peptide binding);GO:0042803(protein homodimerization activity);GO:0032461(positive regulation of protein oligomerization);GO:0005777(peroxisome);GO:0008270(zinc ion binding);GO:0005615(extracellular space);GO:0006508(proteolysis);GO:0005829(cytosol);GO:0005737(cytoplasm);GO:000573…	NA	NA	NA	insulin degrading enzyme [Source:HGNC Symbol;Acc:HGNC:5381]	52.0406	30.1781	23.8907	28.9921	32.4085	20.9493	18.1062	23.1255	17.5749	6.89593	11.5564	11.3267	2.36602	3.50228	4.04017	9.8863	4.03547
65056	0	chr6	-	22303031	22308203	ENSGALT00000009924	9	1401	MSTRG.26136	ENSGALG00000006143	GO:0004430(1-phosphatidylinositol 4-kinase activity);GO:0046854(phosphatidylinositol phosphorylation);GO:0005765(lysosomal membrane);GO:0007030(Golgi organization);GO:0016301(kinase activity);GO:0007032(endosome organization);GO:0005802(trans-Golgi network);GO:0005768(endosome);GO:0005886(plasma membrane)	00562(Inositol phosphate metabolism);04070(Phosphatidylinositol signaling system)	K13711	EC:2.7.1.67	NA	7.47612	4.62654	7.20667	3.19119	3.73016	5.08546	2.56735	4.58646	5.14844	4.75415	3.85318	3.93212	1.85173	1.26944	1.25813	2.13532	1.67473
65077	0	chr6	-	22343554	22345932	ENSGALT00000039466	4	1685	MSTRG.26145	PGAM1	GO:0043456(regulation of pentose-phosphate shunt);GO:0046538(2,3-bisphosphoglycerate-dependent phosphoglycerate mutase activity);GO:0006096(glycolytic process);GO:0006094(gluconeogenesis);GO:0043209(myelin sheath);GO:0004619(phosphoglycerate mutase activity);GO:0004082(bisphosphoglycerate mutase activity);GO:0016868(intramolecular transferase activity, phosphotransferases);GO:0005829(cytosol);GO:…	01200(Carbon metabolism);01230(Biosynthesis of amino acids);00010(Glycolysis / Gluconeogenesis);00260(Glycine, serine and threonine metabolism)	NA	NA	Phosphoglycerate mutase 1 [Source:UniProtKB/Swiss-Prot;Acc:Q5ZLN1]	527.242	486.32	697.054	589.183	851.639	418.124	629.675	974.601	1159.39	105.297	132.713	95.4439	42.7954	44.7351	42.3474	39.1538	35.2185
65079	0	chr6	-	22343557	22345799	ENSGALT00000083849	4	1549	MSTRG.26145	PGAM1	GO:0043456(regulation of pentose-phosphate shunt);GO:0046538(2,3-bisphosphoglycerate-dependent phosphoglycerate mutase activity);GO:0006096(glycolytic process);GO:0006094(gluconeogenesis);GO:0043209(myelin sheath);GO:0004619(phosphoglycerate mutase activity);GO:0004082(bisphosphoglycerate mutase activity);GO:0016868(intramolecular transferase activity, phosphotransferases);GO:0005829(cytosol);GO:…	01200(Carbon metabolism);01230(Biosynthesis of amino acids);00010(Glycolysis / Gluconeogenesis);00260(Glycine, serine and threonine metabolism)	NA	NA	Phosphoglycerate mutase 1 [Source:UniProtKB/Swiss-Prot;Acc:Q5ZLN1]	506.012	528.751	757.881	567.211	814.582	454.62	605.473	937.328	1260.52	102.256	144.329	91.7807	41.7449	42.7385	40.9309	39.0795	34.9016
65099	0	chr6	-	22415677	22485273	ENSGALT00000073831	7	5275	MSTRG.26150	LCOR	GO:0003677(DNA binding)	NA	NA	NA	ligand dependent nuclear receptor corepressor [Source:HGNC Symbol;Acc:HGNC:29503]	1.31688	0.978396	1.21486	0.553862	0.928045	0.720383	0.790205	0.855061	0.635013	0.944184	0	0	0	0.171785	0	0.349448	0.232551
65155	0	chr6	+	22794423	22810422	ENSGALT00000012572	9	1821	MSTRG.26161	POLL	GO:0003887(DNA-directed DNA polymerase activity);GO:0051575(5'-deoxyribose-5-phosphate lyase activity);GO:0000724(double-strand break repair via homologous recombination);GO:0006287(base-excision repair, gap-filling);GO:0006289(nucleotide-excision repair);GO:0006303(double-strand break repair via nonhomologous end joining);GO:0071897(DNA biosynthetic process)	03410(Base excision repair);03450(Non-homologous end-joining)	K03512	EC:2.7.7.7;EC:4.2.99.-	DNA polymerase lambda [Source:HGNC Symbol;Acc:HGNC:9184]	5.49648	4.99266	4.09582	3.2437	3.34474	5.82221	2.95927	2.7811	2.86894	2.23534	2.79408	1.65244	1.13873	1.66874	1.70188	1.07126	0.822902
65260	0	chr6	+	23364623	23386208	ENSGALT00000075450	4	2761	MSTRG.26199	WBP1L	NA	NA	NA	NA	WW domain binding protein 1 like [Source:HGNC Symbol;Acc:HGNC:23510]	18.0944	5.33807	9.33611	0.534864	4.71831	0.929735	6.67557	3.09367	3.13858	1.30275	2.28187	1.23663	3.72834	2.25396	1.778	1.15634	0.930882
65573	0	chr6	+	28026663	28056693	ENSGALT00000063134	18	2334	MSTRG.26327	FAM160B1	NA	NA	NA	NA	family with sequence similarity 160 member B1 [Source:HGNC Symbol;Acc:HGNC:29320]	13.0634	11.2382	9.35889	7.28875	12.8301	10.782	6.30098	6.31609	7.0356	6.57962	3.61788	6.10913	0.610819	0.516716	0	0.20053	0.339059
65705	0	chr6	-	30270619	30288907	ENSGALT00000084636	12	1569	MSTRG.26384	TIAL1	GO:0070062(extracellular exosome);GO:0010494(cytoplasmic stress granule);GO:0005737(cytoplasm);GO:0005634(nucleus);GO:0017145(stem cell division);GO:0008284(positive regulation of cell proliferation);GO:0007281(germ cell development);GO:0017091(AU-rich element binding);GO:0003723(RNA binding);GO:0003676(nucleic acid binding);GO:0003677(DNA binding)	NA	NA	NA	TIA1 cytotoxic granule associated RNA binding protein like 1 [Source:HGNC Symbol;Acc:HGNC:11804]	9.78137	8.97175	5.66664	10.3815	8.51623	5.3059	10.8768	12.0351	5.6303	6.23162	1.99057	5.24094	1.06926	1.25879	3.10816	0.887052	2.49104
65714	0	chr6	+	30302056	30319961	ENSGALT00000015358	4	2261	MSTRG.26388	BAG3	GO:0030018(Z disc);GO:0005886(plasma membrane);GO:0005829(cytosol);GO:0005737(cytoplasm);GO:0005634(nucleus);GO:0097201(negative regulation of transcription from RNA polymerase II promoter in response to stress);GO:0097192(extrinsic apoptotic signaling pathway in absence of ligand);GO:0071260(cellular response to mechanical stimulus);GO:0050821(protein stabilization);GO:0046827(positive regulatio…	NA	NA	NA	BCL2 associated athanogene 3 [Source:HGNC Symbol;Acc:HGNC:939]	27.275	15.2386	24.6906	10.3078	4.43185	8.59791	3.80647	7.63681	3.44536	4.14398	12.2749	4.83181	2.88037	3.83266	1.17441	1.45077	1.2305
65716	0	chr6	+	30302057	30319962	ENSGALT00000088658	4	2261	MSTRG.26388	BAG3	GO:0030018(Z disc);GO:0005886(plasma membrane);GO:0005829(cytosol);GO:0005737(cytoplasm);GO:0005634(nucleus);GO:0097201(negative regulation of transcription from RNA polymerase II promoter in response to stress);GO:0097192(extrinsic apoptotic signaling pathway in absence of ligand);GO:0071260(cellular response to mechanical stimulus);GO:0050821(protein stabilization);GO:0046827(positive regulatio…	NA	NA	NA	BCL2 associated athanogene 3 [Source:HGNC Symbol;Acc:HGNC:939]	27.2645	15.2412	24.6903	10.3107	4.43161	8.60012	3.80644	7.63617	3.445	4.14392	12.2748	4.8315	2.88802	3.83247	1.17002	1.45064	1.23048
66280	0	chr7	-	2770680	2778755	ENSGALT00000040054	7	971	MSTRG.26610	MYL1	GO:0030016(myofibril);GO:0043520(regulation of myosin II filament assembly);GO:0006936(muscle contraction);GO:0016459(myosin complex);GO:0005509(calcium ion binding)	NA	NA	NA	myosin light chain 1 [Source:HGNC Symbol;Acc:HGNC:7582]	745.018	1016.18	1156.85	1116.91	1160.78	968.956	1147.73	1004.78	1332.11	175.668	387.92	163.626	50.5561	63.138	7.42698	7.80234	6.5406
66282	0	chr7	-	2770782	2778755	ENSGALT00000089968	7	867	MSTRG.26610	MYL1	GO:0030016(myofibril);GO:0043520(regulation of myosin II filament assembly);GO:0006936(muscle contraction);GO:0016459(myosin complex);GO:0005509(calcium ion binding)	NA	NA	NA	myosin light chain 1 [Source:HGNC Symbol;Acc:HGNC:7582]	140.896	172.513	125.156	192.598	216.173	157.963	197.059	190.681	253.403	58.8297	31.8038	78.3879	20.936	37.4891	5.68896	4.47942	7.3219
66767	0	chr7	+	8149374	8157458	ENSGALT00000046049	6	2101	MSTRG.26776	ENSGALG00000025884	GO:0003676(nucleic acid binding)	NA	NA	NA	NA	3.37471	3.60827	3.81688	3.44335	2.35965	3.00221	2.79187	2.4369	2.34823	1.86006	0.597867	1.58573	0.031124	0.313105	0.272219	0.309394	0.474999
67614	0	chr7	-	17433265	17496833	ENSGALT00000051784	12	1356	MSTRG.27100	MAP3K20	GO:0007050(cell cycle arrest);GO:0005634(nucleus);GO:0009314(response to radiation);GO:0006468(protein phosphorylation);GO:0004709(MAP kinase kinase kinase activity);GO:0000287(magnesium ion binding);GO:0043065(positive regulation of apoptotic process);GO:0003723(RNA binding);GO:0005524(ATP binding);GO:0004674(protein serine/threonine kinase activity);GO:0035556(intracellular signal transduction)…	NA	NA	NA	mitogen-activated protein kinase kinase kinase 20 [Source:HGNC Symbol;Acc:HGNC:17797]	16.8962	25.6996	3.71478	16.2546	12.8646	13.0164	10.2891	8.16104	0	0	29.1682	4.66789	9.61848	0	6.50836	5.68985	3.90601
67715	0	chr7	-	18254466	18268152	ENSGALT00000015612	10	2149	MSTRG.27127	GORASP2	GO:0005794(Golgi apparatus);GO:0006996(organelle organization)	NA	NA	NA	golgi reassembly stacking protein 2 [Source:HGNC Symbol;Acc:HGNC:17500]	10.0009	11.319	8.02503	7.42077	7.49726	8.28529	8.13261	8.23977	7.36127	5.8854	2.94836	4.81326	0.930001	1.09684	7.85265	1.06936	1.65397
68025	0	chr7	+	21995775	22034365	ENSGALT00000018187	35	5343	MSTRG.27310	ENSGALG00000011153	GO:0009897(external side of plasma membrane);GO:0004888(transmembrane signaling receptor activity);GO:0007165(signal transduction);GO:0005887(integral component of plasma membrane);GO:0016021(integral component of membrane);GO:0016020(membrane)	NA	NA	NA	NA	48.2105	13.2515	18.0085	4.39038	9.05027	0.46652	0.539841	4.07372	0.119967	3.0119	0.720711	0.146292	1.50349	1.04635	0	2.40412	0.216685
68089	0	chr7	-	22291852	22295615	ENSGALT00000018446	9	1465	MSTRG.27330	DES	GO:0097433(dense body);GO:0070062(extracellular exosome);GO:0045111(intermediate filament cytoskeleton);GO:0043292(contractile fiber);GO:0042383(sarcolemma);GO:0031594(neuromuscular junction);GO:0030018(Z disc);GO:0014704(intercalated disc);GO:0005916(fascia adherens);GO:0005911(cell-cell junction);GO:0005882(intermediate filament);GO:0005856(cytoskeleton);GO:0005737(cytoplasm);GO:0045109(interme…	NA	NA	NA	desmin [Source:HGNC Symbol;Acc:HGNC:2770]	945.778	629.923	968.848	721.498	717.308	805.354	315.883	425.375	504.34	300.701	543.672	482.416	243.701	317.444	159.039	239.641	188.912
69660	0	chr8	-	3695082	3700175	ENSGALT00000045569	5	1234	MSTRG.27997	RGS5	GO:0005096(GTPase activator activity);GO:0043547(positive regulation of GTPase activity);GO:0005737(cytoplasm);GO:0005886(plasma membrane);GO:0005829(cytosol)	NA	NA	NA	regulator of G protein signaling 5 [Source:HGNC Symbol;Acc:HGNC:10001]	6.21763	6.26136	11.9848	3.37704	6.39236	4.06302	2.479	3.37202	4.99674	5.65829	6.65517	6.09229	1.40487	1.05754	0.384089	0.377564	0.757665
69662	0	chr8	-	3703920	3706342	ENSGALT00000004067	5	696	MSTRG.27999	ENSGALG00000002581	NA	NA	NA	NA	NA	1.79439	2.06924	2.57289	3.0753	1.94958	2.71734	1.98598	2.21505	4.93972	0.730209	0.800604	0.758281	0.577801	0.032055	0.217674	0.070493	0.2465
69775	0	chr8	-	4300214	4305817	ENSGALT00000052667	7	1906	MSTRG.28029	PRKAB2	GO:0016310(phosphorylation);GO:0016301(kinase activity);GO:0042802(identical protein binding);GO:0004679(AMP-activated protein kinase activity);GO:0031588(nucleotide-activated protein kinase complex)	04371(Apelin signaling pathway);04068(FoxO signaling pathway);04530(Tight junction);04910(Insulin signaling pathway);04920(Adipocytokine signaling pathway)	NA	NA	protein kinase AMP-activated non-catalytic subunit beta 2 [Source:HGNC Symbol;Acc:HGNC:9379]	47.7618	57.2411	54.1296	64.3948	63.3532	52.8058	38.1951	44.2644	58.6838	14.7163	17.9058	18.6599	12.1529	11.9275	8.82432	10.8542	7.74802
69776	0	chr8	-	4300239	4305817	ENSGALT00000084651	8	1671	MSTRG.28029	PRKAB2	GO:0016310(phosphorylation);GO:0016301(kinase activity);GO:0042802(identical protein binding);GO:0004679(AMP-activated protein kinase activity);GO:0031588(nucleotide-activated protein kinase complex)	04371(Apelin signaling pathway);04068(FoxO signaling pathway);04530(Tight junction);04910(Insulin signaling pathway);04920(Adipocytokine signaling pathway)	K07199	NA	protein kinase AMP-activated non-catalytic subunit beta 2 [Source:HGNC Symbol;Acc:HGNC:9379]	8.10371	11.9606	11.4167	21.8196	13.6256	13.8238	15.4802	11.6654	10.8588	2.00626	3.4119	4.33019	0.776467	1.442	0	0.501115	0.640022
69777	0	chr8	-	4300239	4307091	ENSGALT00000084795	8	1671	MSTRG.28029	PRKAB2	GO:0016310(phosphorylation);GO:0016301(kinase activity);GO:0042802(identical protein binding);GO:0004679(AMP-activated protein kinase activity);GO:0031588(nucleotide-activated protein kinase complex)	04371(Apelin signaling pathway);04068(FoxO signaling pathway);04530(Tight junction);04910(Insulin signaling pathway);04920(Adipocytokine signaling pathway)	NA	NA	protein kinase AMP-activated non-catalytic subunit beta 2 [Source:HGNC Symbol;Acc:HGNC:9379]	5.26736	7.11183	5.53285	7.54672	6.59042	4.72204	2.89421	3.39266	5.59444	2.51271	3.37873	4.76073	1.25992	1.59892	1.35899	1.09113	0.884428
69792	0	chr8	-	4327097	4333956	ENSGALT00000086172	5	1225	MSTRG.28033	PRDX6	GO:0070062(extracellular exosome);GO:0016020(membrane);GO:0005737(cytoplasm);GO:0005615(extracellular space);GO:0045296(cadherin binding);GO:0031625(ubiquitin protein ligase binding);GO:0045454(cell redox homeostasis);GO:0051920(peroxiredoxin activity);GO:0016209(antioxidant activity);GO:0016491(oxidoreductase activity);GO:0055114(oxidation-reduction process);GO:0004602(glutathione peroxidase act…	NA	NA	NA	peroxiredoxin 6 [Source:HGNC Symbol;Acc:HGNC:16753]	26.7557	33.5055	35.947	12.3169	13.3268	28.3978	11.2388	12.7183	16.7445	13.9823	9.03781	8.15049	10.6066	10.1843	11.6859	11.5327	11.5149
69930	0	chr8	-	4976799	4993570	ENSGALT00000005276	4	780	MSTRG.28089	METTL11B	GO:0006480(N-terminal protein amino acid methylation);GO:0071885(N-terminal protein N-methyltransferase activity);GO:0008168(methyltransferase activity);GO:0005737(cytoplasm)	NA	NA	NA	methyltransferase like 11B [Source:HGNC Symbol;Acc:HGNC:31932]	2.65571	10.6233	5.40646	0.834383	5.52337	8.08075	2.64338	9.42502	9.69039	1.88825	1.27049	0.429996	0.394636	0	0	0	0.038545
69937	0	chr8	+	5073324	5086438	ENSGALT00000073277	14	3085	MSTRG.28092	SCYL3	GO:0030027(lamellipodium);GO:0005737(cytoplasm);GO:0005794(Golgi apparatus)	NA	NA	NA	protein-associating with the carboxyl-terminal domain of ezrin [Source:RefSeq peptide;Acc:NP_001012613]	5.77056	12.7373	12.7207	8.56966	13.7277	9.95402	9.88569	9.75982	16.4053	3.5613	4.60485	6.59532	4.47299	2.76578	3.72809	2.79072	3.40997
69964	0	chr8	-	5221120	5325617	ENSGALT00000021887	9	1821	MSTRG.28085	PBX1	GO:0043565(sequence-specific DNA binding);GO:0003700(transcription factor activity, sequence-specific DNA binding);GO:0006355(regulation of transcription, DNA-templated);GO:0006366(transcription from RNA polymerase II promoter);GO:0005634(nucleus);GO:0003677(DNA binding);GO:0000978(RNA polymerase II core promoter proximal region sequence-specific DNA binding);GO:0001077(transcriptional activator …	NA	NA	NA	PBX homeobox 1 [Source:HGNC Symbol;Acc:HGNC:8632]	13.9325	16.1835	10.4356	19.3739	12.7213	11.1755	8.95151	13.7061	12.8213	8.41763	9.90563	5.58033	6.50023	7.35787	3.80912	4.09849	5.55961
70133	0	chr8	-	6465507	6566403	ENSGALT00000006891	18	4257	MSTRG.28166	RASAL2	GO:0031235(intrinsic component of the cytoplasmic side of the plasma membrane);GO:0046580(negative regulation of Ras protein signal transduction);GO:0005096(GTPase activator activity);GO:0043087(regulation of GTPase activity);GO:0043547(positive regulation of GTPase activity);GO:0005737(cytoplasm);GO:0007165(signal transduction)	NA	NA	NA	RAS protein activator like 2 [Source:HGNC Symbol;Acc:HGNC:9874]	3.42287	3.16376	3.39395	1.91343	1.42359	7.47856	2.65861	2.70189	2.95246	1.33131	0.743973	0.752652	0.202302	0.40503	0.527239	0.589935	0.966742
70444	0	chr8	+	11705617	11723573	ENSGALT00000008401	7	1525	MSTRG.28269	DPH5	GO:0004164(diphthine synthase activity);GO:0017183(peptidyl-diphthamide biosynthetic process from peptidyl-histidine);GO:0032259(methylation);GO:0008168(methyltransferase activity);GO:0008152(metabolic process)	NA	NA	NA	diphthamide biosynthesis 5 [Source:HGNC Symbol;Acc:HGNC:24270]	3.47681	3.15152	2.4319	6.35375	5.47019	2.54897	4.37521	4.36167	3.43459	2.51323	0.285044	1.65625	1.11255	1.10456	0.978097	1.5871	0.485009
70505	0	chr8	-	11996010	12003650	ENSGALT00000089661	11	582	MSTRG.28285	ENSGALG00000045383	NA	NA	NA	NA	NA	0.473936	2.23303	0.499432	2.50664	1.36914	1.30742	2.76745	2.0293	1.54092	0.180973	0.317396	0.457142	0.035828	0.047602	0	0.063992	0.179459
70516	0	chr8	-	12056098	12089965	ENSGALT00000008683	33	4646	MSTRG.28287	AGL	GO:0016234(inclusion body);GO:0005737(cytoplasm);GO:0005634(nucleus);GO:0005980(glycogen catabolic process);GO:0005977(glycogen metabolic process);GO:0031593(polyubiquitin modification-dependent protein binding);GO:0030247(polysaccharide binding);GO:0004135(amylo-alpha-1,6-glucosidase activity);GO:0004134(4-alpha-glucanotransferase activity);GO:0004133(glycogen debranching enzyme activity);GO:000…	00500(Starch and sucrose metabolism)	NA	NA	amylo-alpha-1, 6-glucosidase, 4-alpha-glucanotransferase [Source:HGNC Symbol;Acc:HGNC:321]	150.933	528.581	323.076	332.657	557.854	282.853	464.95	620.824	0	63.5328	69.6509	34.4623	7.21917	2.51254	0.364231	1.27701	10.2266
71535	0	chr8	-	24252004	24275254	ENSGALT00000017192	31	3499	MSTRG.28738	NRDC	GO:0004222(metalloendopeptidase activity);GO:0006508(proteolysis);GO:0046872(metal ion binding);GO:0003824(catalytic activity)	NA	NA	NA	nardilysin convertase [Source:HGNC Symbol;Acc:HGNC:7995]	69.5356	69.175	52.8576	69.3954	71.3599	58.3664	59.6459	66.0542	69.6913	47.7682	48.9556	39.4251	22.8203	24.9438	25.5859	36.0693	33.86
71661	0	chr8	-	25179117	25183692	ENSGALT00000017477	10	1247	MSTRG.28788	YIPF1	GO:0005802(trans-Golgi network);GO:0030133(transport vesicle);GO:0000138(Golgi trans cisterna);GO:0005797(Golgi medial cisterna);GO:0017137(Rab GTPase binding);GO:0005794(Golgi apparatus);GO:0016021(integral component of membrane);GO:0016020(membrane)	NA	NA	NA	Yip1 domain family member 1 [Source:HGNC Symbol;Acc:HGNC:25231]	2.28347	3.08667	3.85615	4.5937	5.35326	4.17429	1.8036	9.2865	5.77618	1.91778	2.19664	4.03628	0.547364	1.68373	0.981186	1.02225	0.387556
71672	0	chr8	-	25207776	25215986	ENSGALT00000017484	8	1830	MSTRG.28794	TMEM59	GO:0006508(proteolysis);GO:0016021(integral component of membrane);GO:0016020(membrane);GO:0004175(endopeptidase activity);GO:0010508(positive regulation of autophagy);GO:0010955(negative regulation of protein processing);GO:0090285(negative regulation of protein glycosylation in Golgi);GO:0000137(Golgi cis cisterna);GO:0000138(Golgi trans cisterna);GO:0005764(lysosome);GO:0005770(late endosome);…	NA	NA	NA	transmembrane protein 59 [Source:HGNC Symbol;Acc:HGNC:1239]	28.8487	27.3924	16.876	28.4762	13.8226	16.7229	15.7519	26.9227	16.9801	9.41645	17.62	14.3209	8.67024	9.54665	5.15874	6.20941	9.84372
71727	0	chr8	-	25365620	25423197	ENSGALT00000017568	67	7794	MSTRG.28804	USP24	GO:0036459(thiol-dependent ubiquitinyl hydrolase activity);GO:0016579(protein deubiquitination);GO:0006511(ubiquitin-dependent protein catabolic process)	NA	NA	NA	ubiquitin specific peptidase 24 [Source:HGNC Symbol;Acc:HGNC:12623]	88.9688	71.635	52.0471	68.888	77.5962	74.8076	78.8081	100.607	91.7345	54.1088	45.443	67.2037	17.69	23.8256	23.6678	19.5695	13.6461
71753	0	chr8	+	25836881	25855498	ENSGALT00000017601	9	3436	MSTRG.28815	PRKAA2	GO:0031588(nucleotide-activated protein kinase complex);GO:0016607(nuclear speck);GO:0005794(Golgi apparatus);GO:0005634(nucleus);GO:1904101(response to acadesine);GO:0071380(cellular response to prostaglandin E stimulus);GO:0043066(negative regulation of apoptotic process);GO:0042752(regulation of circadian rhythm);GO:0042149(cellular response to glucose starvation);GO:0042593(glucose homeostasi…	04371(Apelin signaling pathway);04068(FoxO signaling pathway);04150(mTOR signaling pathway);04140(Autophagy - animal);04530(Tight junction);04910(Insulin signaling pathway);04920(Adipocytokine signaling pathway)	K07198	EC:2.7.11.11	protein kinase AMP-activated catalytic subunit alpha 2 [Source:HGNC Symbol;Acc:HGNC:9377]	11.3799	27.1685	18.9486	19.1925	16.8454	17.7271	10.8912	6.90408	6.7618	5.70938	5.69279	7.66487	3.78571	6.15275	0.611631	3.51936	1.72004
71937	0	chr8	+	27960953	27980037	ENSGALT00000017947	11	2430	MSTRG.28889	PGM1	GO:0006006(glucose metabolic process);GO:0019388(galactose catabolic process);GO:0005978(glycogen biosynthetic process);GO:0004614(phosphoglucomutase activity);GO:0071704(organic substance metabolic process);GO:0016868(intramolecular transferase activity, phosphotransferases);GO:0000287(magnesium ion binding);GO:0005829(cytosol);GO:0005975(carbohydrate metabolic process);GO:0046872(metal ion bind…	00010(Glycolysis / Gluconeogenesis);00030(Pentose phosphate pathway);00052(Galactose metabolism);00500(Starch and sucrose metabolism);00520(Amino sugar and nucleotide sugar metabolism);00230(Purine metabolism)	NA	NA	phosphoglucomutase 1 [Source:HGNC Symbol;Acc:HGNC:8905]	160.865	260.49	428.693	231.043	265.857	205.082	2.74643	218.114	28.9553	64.5071	42.7556	0	5.21368	9.69515	0.471421	0.365395	0
71939	0	chr8	+	27961082	27980037	ENSGALT00000085277	11	2301	MSTRG.28889	PGM1	GO:0006006(glucose metabolic process);GO:0019388(galactose catabolic process);GO:0005978(glycogen biosynthetic process);GO:0004614(phosphoglucomutase activity);GO:0071704(organic substance metabolic process);GO:0016868(intramolecular transferase activity, phosphotransferases);GO:0000287(magnesium ion binding);GO:0005829(cytosol);GO:0005975(carbohydrate metabolic process);GO:0046872(metal ion bind…	00010(Glycolysis / Gluconeogenesis);00030(Pentose phosphate pathway);00052(Galactose metabolism);00500(Starch and sucrose metabolism);00520(Amino sugar and nucleotide sugar metabolism);00230(Purine metabolism)	K01835	EC:5.4.2.2	phosphoglucomutase 1 [Source:HGNC Symbol;Acc:HGNC:8905]	1059.78	1370.08	1433.73	1164.62	1650.43	1184.72	1435.79	1708.74	1541.04	68.1116	63.0725	37.3512	5.4759	10.176	0.492154	0.381234	0
71988	0	chr8	+	28602386	28623532	ENSGALT00000018074	10	3098	MSTRG.28881	PDE4B	GO:0071944(cell periphery);GO:0060076(excitatory synapse);GO:0043197(dendritic spine);GO:0016020(membrane);GO:0014069(postsynaptic density);GO:0008021(synaptic vesicle);GO:0005829(cytosol);GO:0005813(centrosome);GO:0000930(gamma-tubulin complex);GO:0071222(cellular response to lipopolysaccharide);GO:0050900(leukocyte migration);GO:0050852(T cell receptor signaling pathway);GO:0035690(cellular res…	00230(Purine metabolism)	K13293	EC:3.1.4.53	phosphodiesterase 4B [Source:HGNC Symbol;Acc:HGNC:8781]	12.1524	3.82852	13.9429	6.67578	8.29996	9.21953	7.79266	8.38082	8.12304	5.24564	8.03487	5.76574	4.30405	4.26749	2.36292	2.60722	2.94027
72268	0	chr9	+	1162778	1181569	ENSGALT00000002475	19	1872	MSTRG.28985	ATG16L1	GO:0005930(axoneme);GO:0005776(autophagosome);GO:0000421(autophagosome membrane);GO:0039689(negative stranded viral RNA replication);GO:0042802(identical protein binding);GO:0000045(autophagosome assembly);GO:0051020(GTPase binding);GO:0034497(protein localization to pre-autophagosomal structure);GO:0061739(protein lipidation involved in autophagosome assembly);GO:0098792(xenophagy)	04140(Autophagy - animal);04136(Autophagy - other eukaryotes);04621(NOD-like receptor signaling pathway)	NA	NA	autophagy related 16 like 1 [Source:HGNC Symbol;Acc:HGNC:21498]	16.1	15.0354	12.8112	12.3093	12.7214	7.04706	3.22615	5.89738	10.1125	11.5185	5.16067	7.28443	0.985242	2.3929	4.27527	0.905842	1.37574
73268	0	chr9	-	11576135	11588043	ENSGALT00000011008	9	1477	MSTRG.29433	ENSGALG00000006805	GO:0017121(phospholipid scrambling);GO:0017128(phospholipid scramblase activity);GO:0005886(plasma membrane)	NA	NA	NA	NA	8.81131	12.0959	29.8273	6.83666	6.69541	17.8365	5.87753	6.19032	7.97371	4.79855	6.32943	3.90136	3.73491	1.87626	1.6857	1.82737	0.801983
73771	0	chr9	-	16110270	16124762	ENSGALT00000048241	9	3352	MSTRG.29588	SENP5	GO:0016926(protein desumoylation);GO:0016929(SUMO-specific protease activity);GO:0004175(endopeptidase activity);GO:0005730(nucleolus);GO:0007049(cell cycle);GO:0008234(cysteine-type peptidase activity);GO:0005634(nucleus);GO:0006508(proteolysis)	NA	NA	NA	SUMO1/sentrin specific peptidase 5 [Source:HGNC Symbol;Acc:HGNC:28407]	4.56885	8.42821	7.92519	4.65242	5.83764	6.75711	4.54972	6.90632	4.41697	2.76778	4.49144	6.74321	1.18613	1.45181	3.99355	0.754157	2.17051
74004	0	chr9	+	19337258	19352711	ENSGALT00000014937	5	1227	MSTRG.29683	NCEH1	GO:0016020(membrane);GO:0060395(SMAD protein signal transduction);GO:0006805(xenobiotic metabolic process);GO:0006470(protein dephosphorylation);GO:0042301(phosphate ion binding);GO:0017171(serine hydrolase activity);GO:0009056(catabolic process);GO:0052689(carboxylic ester hydrolase activity);GO:0016787(hydrolase activity);GO:0008152(metabolic process);GO:0016021(integral component of membrane)	NA	NA	NA	neutral cholesterol ester hydrolase 1 [Source:HGNC Symbol;Acc:HGNC:29260]	16.583	9.10413	14.5556	13.3054	13.2282	6.30136	11.4029	8.50188	10.9629	17.5602	9.7476	9.23226	1.1231	2.58315	2.54626	1.95194	2.69795
74362	0	chr9	-	23479986	23509506	ENSGALT00000074316	7	3670	MSTRG.29830	MBNL1	GO:0043484(regulation of RNA splicing);GO:0010494(cytoplasmic stress granule);GO:0008380(RNA splicing);GO:0003723(RNA binding);GO:0005737(cytoplasm);GO:0005634(nucleus);GO:0005654(nucleoplasm);GO:0005829(cytosol);GO:0005813(centrosome);GO:0003725(double-stranded RNA binding)	NA	NA	NA	muscleblind-like protein 1 isoform 2 [Source:RefSeq peptide;Acc:NP_001156797]	12.5273	13.7139	4.60316	12.7872	9.83856	2.53146	4.85043	6.11167	7.62268	0.295693	0.535724	0.033802	0.005504	0.040048	0.14547	0.043607	0.138524
88261	0	chrZ	-	7196650	7209336	ENSGALT00000003868	6	879	MSTRG.39792	AQP3	GO:0016323(basolateral plasma membrane);GO:0005911(cell-cell junction);GO:0005886(plasma membrane);GO:0005737(cytoplasm);GO:0005634(nucleus);GO:0070295(renal water absorption);GO:0032526(response to retinoic acid);GO:0015840(urea transport);GO:0015793(glycerol transport);GO:0006833(water transport);GO:0002684(positive regulation of immune system process);GO:0015254(glycerol channel activity);GO:0…	NA	NA	NA	aquaporin 3 (Gill blood group) [Source:HGNC Symbol;Acc:HGNC:636]	18.5814	45.099	48.328	18.1936	17.671	14.0513	12.2216	16.9428	21.6573	2.77787	10.8447	10.6616	3.61241	3.94427	0.379913	0.505476	0.173299
88385	0	chrZ	-	8540992	8562186	ENSGALT00000003093	17	2918	MSTRG.40033	ENSGALG00000001986	GO:0005515(protein binding);GO:0016787(hydrolase activity);GO:0005524(ATP binding);GO:0000166(nucleotide binding)	04141(Protein processing in endoplasmic reticulum)	NA	NA	NA	58.7063	78.6475	98.0963	58.8244	68.2003	76.8576	40.3301	74.9434	44.9036	49.7754	59.3118	17.2037	18.5247	18.1515	50.5323	43.5394	23.8857
88710	0	chrZ	+	12937309	12956457	ENSGALT00000023947	18	2578	MSTRG.40184	C7	GO:0070062(extracellular exosome);GO:0005579(membrane attack complex);GO:0006955(immune response)	NA	NA	NA	complement C7 [Source:HGNC Symbol;Acc:HGNC:1346]	5.37747	3.4202	4.98125	0.778002	0.939201	9.15151	1.11577	0.592212	0.88964	1.53391	2.23494	1.26505	0.109545	0.160361	0.06031	0.025014	0.008889
88844	0	chrZ	-	16203913	16414421	ENSGALT00000074103	7	1062	MSTRG.40253	ARL15	GO:0007264(small GTPase mediated signal transduction);GO:0005525(GTP binding);GO:0005622(intracellular);GO:0000166(nucleotide binding);GO:0070062(extracellular exosome)	NA	NA	NA	ADP ribosylation factor like GTPase 15 [Source:HGNC Symbol;Acc:HGNC:25945]	0.090065	2.36178	1.45798	1.10211	0.95968	0.653268	1.87464	1.74815	0.831283	0.035866	0.036783	0.79477	0.062686	0.083182	0.031473	0.041678	0.037847
88946	0	chrZ	-	18254057	18419639	ENSGALT00000082151	15	2055	MSTRG.40308	PDE4D	GO:0004114(3',5'-cyclic-nucleotide phosphodiesterase activity);GO:0008081(phosphoric diester hydrolase activity);GO:0016787(hydrolase activity);GO:0046872(metal ion binding);GO:0007165(signal transduction);GO:0030552(cAMP binding);GO:0008144(drug binding);GO:0005829(cytosol);GO:0005886(plasma membrane);GO:0071222(cellular response to lipopolysaccharide);GO:0005813(centrosome);GO:0044325(ion chann…	00230(Purine metabolism)	NA	NA	phosphodiesterase 4D [Source:HGNC Symbol;Acc:HGNC:8783]	16.3963	13.7795	3.58587	3.35264	1.69426	2.94908	0.45522	4.4934	1.45772	0	0	0.602752	0.025938	6.9e-05	0.239956	0.008304	0.01914
89215	0	chrZ	+	21917334	21924549	ENSGALT00000023875	4	502	MSTRG.40464	MRPS36	GO:0009353(mitochondrial oxoglutarate dehydrogenase complex);GO:0005763(mitochondrial small ribosomal subunit);GO:0005739(mitochondrion)	NA	NA	NA	mitochondrial ribosomal protein S36 [Source:HGNC Symbol;Acc:HGNC:16631]	6.59868	7.96895	5.61037	11.4873	7.91466	6.82253	8.20699	8.02026	8.78592	5.57917	6.21231	4.75818	3.36179	2.64378	2.86028	3.92687	3.24954
89804	0	chrZ	-	27456862	27469215	ENSGALT00000023329	5	1035	MSTRG.40602	AK3	GO:0005739(mitochondrion);GO:0046039(GTP metabolic process);GO:0046899(nucleoside triphosphate adenylate kinase activity);GO:0046033(AMP metabolic process);GO:0046041(ITP metabolic process);GO:0046051(UTP metabolic process);GO:0005759(mitochondrial matrix);GO:0006172(ADP biosynthetic process);GO:0016776(phosphotransferase activity, phosphate group as acceptor);GO:0046939(nucleotide phosphorylatio…	00230(Purine metabolism)	K00944	EC:2.7.4.10	adenylate kinase 3 [Source:HGNC Symbol;Acc:HGNC:17376]	21.4902	20.2997	15.2348	19.9833	18.4872	11.8316	17.7261	17.0175	14.3601	15.1451	19.7858	19.777	8.74304	9.12662	8.84591	7.85012	6.63061
90211	0	chrZ	+	35677318	35702153	ENSGALT00000024432	14	1353	MSTRG.40852	GDA	GO:0070062(extracellular exosome);GO:0006147(guanine catabolic process);GO:0008892(guanine deaminase activity);GO:0016810(hydrolase activity, acting on carbon-nitrogen (but not peptide) bonds);GO:0008270(zinc ion binding);GO:0016787(hydrolase activity);GO:0046098(guanine metabolic process)	00230(Purine metabolism)	K01487	EC:3.5.4.3	guanine deaminase [Source:HGNC Symbol;Acc:HGNC:4212]	1.90088	2.36121	1.79748	1.45194	0.909667	10.284	0.318152	0.863572	1.20566	1.15313	0.795864	0.994245	0.200938	0.262181	0.35686	0.273323	0.351729
90320	0	chrZ	-	39982224	40011531	ENSGALT00000020549	11	2900	MSTRG.40909	ENSGALG00000012585	NA	04141(Protein processing in endoplasmic reticulum)	K04523	NA	NA	9.97237	5.75805	6.25107	6.90502	4.3892	4.74996	3.40114	2.84353	3.44637	2.33672	1.4595	3.42897	2.0412	2.24179	0.940666	1.77779	2.0513
90395	0	chrZ	+	41408607	41414029	ENSGALT00000020588	8	1400	MSTRG.40935	ENSGALG00000012610	GO:0051603(proteolysis involved in cellular protein catabolic process);GO:0005764(lysosome);GO:0004197(cysteine-type endopeptidase activity);GO:0008234(cysteine-type peptidase activity);GO:0006508(proteolysis);GO:0016787(hydrolase activity);GO:0008233(peptidase activity);GO:0005615(extracellular space)	04145(Phagosome);04142(Lysosome);04140(Autophagy - animal);04210(Apoptosis)	NA	NA	NA	20.7968	16.3314	18.5037	10.6592	6.10572	20.6914	20.974	20.6574	11.1192	11.4441	13.6043	18.0707	4.9886	5.32944	2.78671	6.4094	6.08865
90398	0	chrZ	+	41409060	41414022	ENSGALT00000088432	7	1521	MSTRG.40935	ENSGALG00000012610	GO:0051603(proteolysis involved in cellular protein catabolic process);GO:0005764(lysosome);GO:0004197(cysteine-type endopeptidase activity);GO:0008234(cysteine-type peptidase activity);GO:0006508(proteolysis);GO:0016787(hydrolase activity);GO:0008233(peptidase activity);GO:0005615(extracellular space)	04145(Phagosome);04142(Lysosome);04140(Autophagy - animal);04210(Apoptosis)	K01365	EC:3.4.22.15	NA	7.39034	1.95645	2.80909	1.12787	0.85062	2.15882	2.16463	2.36598	2.01445	1.59945	1.33687	2.45686	0.576959	0.404173	1.51697	1.31944	0.803009
90400	0	chrZ	-	41423206	41442998	ENSGALT00000020591	7	1023	MSTRG.40936	FBP2	GO:0070062(extracellular exosome);GO:0005886(plasma membrane);GO:0005654(nucleoplasm);GO:0030388(fructose 1,6-bisphosphate metabolic process);GO:0006002(fructose 6-phosphate metabolic process);GO:0006000(fructose metabolic process);GO:0005986(sucrose biosynthetic process);GO:0042802(identical protein binding);GO:0042132(fructose 1,6-bisphosphate 1-phosphatase activity);GO:0006094(gluconeogenesis)…	01200(Carbon metabolism);00010(Glycolysis / Gluconeogenesis);00030(Pentose phosphate pathway);00051(Fructose and mannose metabolism);04910(Insulin signaling pathway)	K03841	EC:3.1.3.11	fructose-bisphosphatase 2 [Source:HGNC Symbol;Acc:HGNC:3607]	143.209	143.519	108.691	215.937	219.467	109.405	191.625	220.08	179.188	19.9419	17.4446	13.4401	6.02766	4.53204	0.056999	0.136631	0.180401
90592	0	chrZ	+	44899734	44903752	ENSGALT00000000584	3	596	MSTRG.41039	ENSGALG00000000428	GO:0042803(protein homodimerization activity);GO:0005737(cytoplasm);GO:0005634(nucleus);GO:0003824(catalytic activity);GO:0016310(phosphorylation);GO:0016301(kinase activity)	NA	NA	NA	NA	12.5669	12.1702	7.80447	13.7948	15.0417	8.94417	10.5408	9.31288	11.3114	6.33502	16.3426	5.51276	5.23147	2.7094	3.4073	3.01394	3.92987
91093	0	chrZ	+	57343843	57352236	ENSGALT00000023648	3	574	MSTRG.41252	GLRX	GO:0070062(extracellular exosome);GO:0005739(mitochondrion);GO:0005737(cytoplasm);GO:0005634(nucleus);GO:2000651(positive regulation of sodium ion transmembrane transporter activity);GO:0045838(positive regulation of membrane potential);GO:0047485(protein N-terminus binding);GO:0015035(protein disulfide oxidoreductase activity);GO:0009055(electron carrier activity);GO:0045454(cell redox homeostas…	NA	NA	NA	glutaredoxin [Source:HGNC Symbol;Acc:HGNC:4330]	1.5599	2.05353	6.25654	3.38162	6.69921	6.95771	0.793847	0.728068	0.707647	0.420517	0.255791	0.265341	0.146865	0.512951	0.70436	0.567648	0.157032
91514	0	chrZ	+	66404350	66462465	ENSGALT00000025304	49	7375	MSTRG.41475	KIAA0368	GO:0005634(nucleus);GO:0043248(proteasome assembly);GO:0032947(protein complex scaffold activity)	NA	NA	NA	KIAA0368 [Source:HGNC Symbol;Acc:HGNC:29020]	24.7557	0.789172	22.2554	22.5473	24.9578	12.0128	9.53151	14.9822	14.2587	11.8966	15.2629	5.75917	6.90575	6.63502	4.30999	6.05956	3.42555
91612	0	chrZ	-	68502953	68521959	ENSGALT00000002747	14	4333	MSTRG.41501	PLAA	GO:0070062(extracellular exosome);GO:0010992(ubiquitin recycling);GO:0006954(inflammatory response);GO:0016005(phospholipase A2 activator activity);GO:0043161(proteasome-mediated ubiquitin-dependent protein catabolic process);GO:0043130(ubiquitin binding);GO:0005634(nucleus);GO:0043085(positive regulation of catalytic activity);GO:0005737(cytoplasm);GO:0016236(macroautophagy);GO:0006693(prostagla…	04141(Protein processing in endoplasmic reticulum)	NA	NA	phospholipase A2 activating protein [Source:HGNC Symbol;Acc:HGNC:9043]	3.51206	3.2884	2.57245	2.5534	3.61314	1.01956	4.33281	3.55232	1.70392	3.09426	1.96289	1.99373	1.18705	0.857605	0.292228	0.94627	1.00391
91661	0	chrZ	+	70593750	70601481	ENSGALT00000037566	8	2364	MSTRG.41530	DNAJA1	GO:0070062(extracellular exosome);GO:0016020(membrane);GO:0015630(microtubule cytoskeleton);GO:0005829(cytosol);GO:0000151(ubiquitin ligase complex);GO:1905259(negative regulation of nitrosative stress-induced intrinsic apoptotic signaling pathway);GO:1903748(negative regulation of establishment of protein localization to mitochondrion);GO:1901998(toxin transport);GO:0070585(protein localization …	04141(Protein processing in endoplasmic reticulum)	NA	NA	DnaJ heat shock protein family (Hsp40) member A1 [Source:HGNC Symbol;Acc:HGNC:5229]	19.3307	21.6598	16.7714	21.3406	21.8081	20.3896	17.1501	12.0699	13.5552	13.8598	15.9182	9.75105	3.16541	3.00445	5.75447	8.5753	5.2193
